# Supplementary material for: The Prolyl Isomerase Pin1 Promotes the Herpesvirus-Induced Phosphorylation-Dependent Disassembly of the Nuclear Lamina Required for Nucleocytoplasmic Egress
Source: PLoS Pathog. 2016 Aug 24;12(8):e1005825. doi: 10.1371/journal.ppat.1005825 (PMC4996521; doi:10.1371/journal.ppat.1005825)
Supplement: S1 Dataset — Signal intensities were determined for infected and surrounding uninfected cells from maximum projections of confocal z-series for the indicated viruses. The first index card shows a summary of mean signal intensities and mean percentages of cells with increased lamin phosphorylation from three independent experiments for each virus. Note that the mean values ± standard deviation are also depicted in Table 2. The following index cards show the signal intensities of individual cells for each virus setting. P values were determined by Student’s t-test. (XLSX) [file ppat.1005825.s009.xlsx]

## Sheet: Summary pS22
HSV1	Mean pS22 signal		Cells with increased pS22 signals
Experiment	Uninfected	Infected	Uninfected	Infected
HSV1-pS22-A	1	2.52328	0.119403	0.760274
HSV1-pS22-B	1	2.62275	0.133333	0.783784
HSV1-pS22-C	1	2.28886	0.0948276	0.884211
Mean	1	2.4783	0.115855	0.809423
SD	0	0.171433	0.0194966	0.0658262
p-value	< 0.0001		< 0.0001
HSV1DUS3	Mean pS22 signal		Cells with increased pS22 signals
Experiment	Uninfected	Infected	Uninfected	Infected
HSV1DUS3-pS22-A	1	1.39591	0.181818	0.519481
HSV1DUS3-pS22-B	1	1.48892	0.133333	0.593407
HSV1DUS3-pS22-C	1	1.36819	0.171429	0.265306
Mean	1	1.41768	0.162193	0.459398
SD	0	0.0632397	0.0255277	0.172104
p-value	0.0003		0.042
VZV	Mean pS22 signal		Cells with increased pS22 signals
Experiment	Uninfected	Infected	Uninfected	Infected
VZV-pS22-A	1	1.50449	0.176471	0.59596
VZV-pS22-B	1	1.40973	0.145833	0.479592
VZV-pS22-C	1	1.32118	0.125	0.52
Mean	1	1.4118	0.149101	0.53185
SD	0	0.09167	0.0258904	0.0590821
p-value	0.0014		0.0005
HCMV AD	Mean pS22 signal		Cells with increased pS22 signals
Experiment	Uninfected	Infected	Uninfected	Infected
HCMV AD-pS22-A	1	1.68484	0.144737	0.829114
HCMV AD-pS22-B	1	1.67568	0.16129	0.931298
HCMV AD-pS22-C	1	1.97891	0.149254	0.895833
HCMV AD-pS22-C	1	2.49716	0.108911	0.905983
Mean	1	1.95915	0.141048	0.890557
SD	0	0.385334	0.0225351	0.0435923
p-value	0.0025		< 0.0001
HCMV TB	Mean pS22 signal		Cells with increased pS22 signals
Experiment	Uninfected	Infected	Uninfected	Infected
HCMV TB-pS22-A	1	2.19697	0.106557	0.857143
HCMV TB-pS22-B	1	2.28649	0.100775	0.908257
HCMV TB-pS22-C	1	2.13777	0.0934579	0.777778
Mean	1	2.20708	0.100264	0.847726
SD	0	0.0748735	0.00656469	0.0657473
p-value	< 0.0001		< 0.0001
HCMVDUL97	Mean pS22 signal		Cells with increased pS22 signals
Experiment	Uninfected	Infected	Uninfected	Infected
HCMVDUL97-pS22-A	1	1.02287	0.121951	0.121212
HCMVDUL97-pS22-B	1	1.05688	0.0923077	0.113208
HCMVDUL97-pS22-C	1	1.0152	0.0869565	0.148148
Mean	1	1.03165	0.100405	0.127523
SD	0	0.0221822	0.0188503	0.0183051
p-value	0.067		0.15
HHV6A	Mean pS22 signal		Cells with increased pS22 signals
Experiment	Uninfected	Infected	Uninfected	Infected
HHV6A-pS22-A	1	1.81816	0.153846	0.619718
HHV6A-pS22-B	1	1.79001	0.102564	0.568627
HHV6A-pS22-C	1	1.46457	0.172727	0.611111
Mean	1	1.69092	0.143046	0.599819
SD	0	0.196522	0.0363071	0.0273533
p-value	0.0039		< 0.0001
RhCMV	Mean pS22 signal		Cells with increased pS22 signals
Experiment	Uninfected	Infected	Uninfected	Infected
RhCMV-pS22-A	1	1.50695	0.131915	0.776596
RhCMV-pS22-B	1	1.56024	0.163043	0.875
RhCMV-pS22-C	1	1.54004	0.10989	0.916667
Mean	1	1.53574	0.134949	0.856087
SD	0	0.0268997	0.0267063	0.0719252
p-value	< 0.0001		< 0.0001

## Sheet: HSV1
HSV1-pS22-A											HSV1-pS22-B											HSV1-pS22-C
Uninfected				Infected							Uninfected				Infected
#	pS22	n=		#	pS22	n=					#	pS22	n=		#	pS22	n=					#	pS22	n=		#	pS22	n=
HSV1-pS22-A06-U-19	2.68611	1		HSV1-pS22-A04-I-05	16.2785	1		Uninfected (HSV1-pS22-A)			HSV1-pS22-B01-U-29	2.60564	1		HSV1-pS22-B02-I-06	8.53731	1		Uninfected (HSV1-pS22-B)			HSV1-pS22-C04-U-23	2.21765	1		HSV1-pS22-C05-I-26	5.10247	1		Uninfected (HSV1-pS22-C)
HSV1-pS22-A05-U-07	2.61997	2		HSV1-pS22-A04-I-12	6.95784	2		Mean	1		HSV1-pS22-B01-U-31	1.94242	2		HSV1-pS22-B04-I-08	6.97907	2		Mean	1		HSV1-pS22-C03-U-25	1.9286	2		HSV1-pS22-C03-I-20	5.10219	2		Mean	1
HSV1-pS22-A02-U-09	2.61215	3		HSV1-pS22-A01-I-08	6.78982	3		SD	0.519213		HSV1-pS22-B01-U-03	1.83893	3		HSV1-pS22-B04-I-10	6.63767	3		SD	0.3749		HSV1-pS22-C05-U-16	1.83793	3		HSV1-pS22-C03-I-19	4.63217	3		SD	0.251649
HSV1-pS22-A02-U-08	2.35339	4		HSV1-pS22-A06-I-04	6.63083	4		n=	67		HSV1-pS22-B04-U-03	1.82093	4		HSV1-pS22-B01-I-01	5.86519	4		n=	90		HSV1-pS22-C03-U-24	1.44049	4		HSV1-pS22-C05-I-25	4.47971	4		n=	116
HSV1-pS22-A03-U-04	1.96431	5		HSV1-pS22-A06-I-22	6.59139	5		Increased	0.119403		HSV1-pS22-B02-U-20	1.81685	5		HSV1-pS22-B02-I-07	5.63676	5		Increased	0.133333		HSV1-pS22-C03-U-23	1.40079	5		HSV1-pS22-C03-I-18	4.20008	5		Increased	0.0948276
HSV1-pS22-A06-U-18	1.96303	6		HSV1-pS22-A05-I-07	6.35083	6					HSV1-pS22-B04-U-07	1.75356	6		HSV1-pS22-B03-I-12	5.22538	6					HSV1-pS22-C01-U-29	1.39503	6		HSV1-pS22-C04-I-16	4.0364	6
HSV1-pS22-A04-U-06	1.68339	7		HSV1-pS22-A06-I-15	5.84259	7					HSV1-pS22-B01-U-07	1.66139	7		HSV1-pS22-B01-I-03	5.06227	7					HSV1-pS22-C02-U-23	1.39063	7		HSV1-pS22-C04-I-15	3.99041	7
HSV1-pS22-A01-U-06	1.56977	8		HSV1-pS22-A06-I-03	5.78105	8		Infected (HSV1-pS22-A)			HSV1-pS22-B02-U-21	1.54333	8		HSV1-pS22-B02-I-12	4.97071	8		Infected (HSV1-pS22-B)			HSV1-pS22-C04-U-22	1.35064	8		HSV1-pS22-C03-I-17	3.76922	8		Infected (HSV1-pS22-C)
HSV1-pS22-A03-U-05	1.39497	9		HSV1-pS22-A01-I-16	5.74777	9		mean	2.52328		HSV1-pS22-B01-U-23	1.53089	9		HSV1-pS22-B04-I-14	4.53632	9		mean	2.62275		HSV1-pS22-C01-U-28	1.28553	9		HSV1-pS22-C02-I-16	3.7329	9		mean	2.28886
HSV1-pS22-A01-U-11	1.36103	10		HSV1-pS22-A06-I-23	5.65895	10		SD	1.77878		HSV1-pS22-B01-U-28	1.51825	10		HSV1-pS22-B03-I-14	4.29209	10		SD	1.545		HSV1-pS22-C01-U-27	1.26514	10		HSV1-pS22-C03-I-16	3.52804	10		SD	0.853174
HSV1-pS22-A01-U-13	1.34588	11		HSV1-pS22-A04-I-10	5.30749	11		n=	146		HSV1-pS22-B04-U-06	1.51619	11		HSV1-pS22-B02-I-15	4.17724	11		n=	74		HSV1-pS22-C01-U-26	1.26275	11		HSV1-pS22-C03-I-15	3.49248	11		n=	95
HSV1-pS22-A06-U-17	1.32174	12		HSV1-pS22-A03-I-09	4.97032	12		Increased	0.760274		HSV1-pS22-B02-U-17	1.3759	12		HSV1-pS22-B02-I-09	4.15385	12		Increased	0.783784		HSV1-pS22-C02-U-22	1.24414	12		HSV1-pS22-C03-I-14	3.46351	12		Increased	0.884211
HSV1-pS22-A04-U-07	1.29867	13		HSV1-pS22-A04-I-09	4.93963	13					HSV1-pS22-B03-U-17	1.34321	13		HSV1-pS22-B03-I-04	3.63449	13					HSV1-pS22-C01-U-25	1.23286	13		HSV1-pS22-C02-I-15	3.43725	13
HSV1-pS22-A05-U-08	1.25647	14		HSV1-pS22-A02-I-09	4.55712	14					HSV1-pS22-B03-U-13	1.33786	14		HSV1-pS22-B03-I-13	3.38869	14					HSV1-pS22-C01-U-24	1.22839	14		HSV1-pS22-C03-I-13	3.30303	14
HSV1-pS22-A06-U-16	1.18594	15		HSV1-pS22-A01-I-09	4.44488	15					HSV1-pS22-B03-U-05	1.30703	15		HSV1-pS22-B03-I-05	3.33227	15					HSV1-pS22-C01-U-23	1.21314	15		HSV1-pS22-C03-I-12	3.26931	15
HSV1-pS22-A01-U-07	1.16139	16		HSV1-pS22-A01-I-14	4.22616	16					HSV1-pS22-B03-U-22	1.30189	16		HSV1-pS22-B02-I-19	3.29062	16					HSV1-pS22-C02-U-21	1.21309	16		HSV1-pS22-C01-I-17	3.18017	16
HSV1-pS22-A03-U-06	1.15635	17		HSV1-pS22-A06-I-13	3.89919	17					HSV1-pS22-B02-U-14	1.29885	17		HSV1-pS22-B02-I-21	3.24527	17					HSV1-pS22-C02-U-20	1.20212	17		HSV1-pS22-C04-I-14	3.15301	17
HSV1-pS22-A01-U-12	1.14581	18		HSV1-pS22-A04-I-19	3.77749	18					HSV1-pS22-B03-U-03	1.28584	18		HSV1-pS22-B02-I-16	3.15622	18					HSV1-pS22-C05-U-15	1.19657	18		HSV1-pS22-C03-I-11	3.01403	18
HSV1-pS22-A02-U-06	1.10867	19		HSV1-pS22-A06-I-27	3.62845	19					HSV1-pS22-B03-U-08	1.27032	19		HSV1-pS22-B03-I-15	3.07556	19					HSV1-pS22-C04-U-21	1.1924	19		HSV1-pS22-C05-I-24	2.94987	19
HSV1-pS22-A06-U-15	1.10026	20		HSV1-pS22-A04-I-18	3.60518	20					HSV1-pS22-B04-U-09	1.24275	20		HSV1-pS22-B02-I-05	3.04829	20					HSV1-pS22-C03-U-22	1.18038	20		HSV1-pS22-C01-I-16	2.94739	20
HSV1-pS22-A06-U-14	1.09487	21		HSV1-pS22-A05-I-05	3.56891	21					HSV1-pS22-B01-U-25	1.22336	21		HSV1-pS22-B02-I-08	3.01341	21					HSV1-pS22-C04-U-20	1.17823	21		HSV1-pS22-C02-I-14	2.94556	21
HSV1-pS22-A01-U-09	1.07077	22		HSV1-pS22-A01-I-22	3.56438	22					HSV1-pS22-B03-U-15	1.18958	22		HSV1-pS22-B04-I-13	2.88779	22					HSV1-pS22-C01-U-22	1.17731	22		HSV1-pS22-C01-I-15	2.87819	22
HSV1-pS22-A04-U-01	1.02107	23		HSV1-pS22-A01-I-19	3.50773	23					HSV1-pS22-B03-U-23	1.15204	23		HSV1-pS22-B04-I-01	2.78844	23					HSV1-pS22-C05-U-14	1.17209	23		HSV1-pS22-C03-I-10	2.86688	23
HSV1-pS22-A05-U-06	0.987574	24		HSV1-pS22-A01-I-02	3.4981	24					HSV1-pS22-B01-U-30	1.14799	24		HSV1-pS22-B03-I-16	2.78089	24					HSV1-pS22-C02-U-19	1.16977	24		HSV1-pS22-C04-I-13	2.86343	24
HSV1-pS22-A06-U-13	0.962418	25		HSV1-pS22-A05-I-22	3.4866	25					HSV1-pS22-B03-U-10	1.11953	25		HSV1-pS22-B01-I-02	2.77802	25					HSV1-pS22-C01-U-21	1.16415	25		HSV1-pS22-C03-I-09	2.80925	25
HSV1-pS22-A05-U-09	0.948939	26		HSV1-pS22-A04-I-13	3.46182	26					HSV1-pS22-B03-U-27	1.09929	26		HSV1-pS22-B02-I-17	2.7758	26					HSV1-pS22-C04-U-19	1.14606	26		HSV1-pS22-C04-I-12	2.80399	26
HSV1-pS22-A01-U-01	0.914912	27		HSV1-pS22-A01-I-17	3.43094	27					HSV1-pS22-B03-U-18	1.09436	27		HSV1-pS22-B02-I-14	2.71127	27					HSV1-pS22-C01-U-20	1.14228	27		HSV1-pS22-C04-I-11	2.79303	27
HSV1-pS22-A06-U-12	0.89867	28		HSV1-pS22-A05-I-21	3.39608	28					HSV1-pS22-B03-U-11	1.08985	28		HSV1-pS22-B03-I-08	2.6214	28					HSV1-pS22-C01-U-19	1.13659	28		HSV1-pS22-C01-I-14	2.77536	28
HSV1-pS22-A01-U-08	0.89311	29		HSV1-pS22-A05-I-04	3.34597	29					HSV1-pS22-B02-U-03	1.06678	29		HSV1-pS22-B04-I-12	2.56442	29					HSV1-pS22-C01-U-18	1.13163	29		HSV1-pS22-C02-I-13	2.71257	29
HSV1-pS22-A06-U-11	0.886114	30		HSV1-pS22-A06-I-02	3.25197	30					HSV1-pS22-B03-U-16	1.03952	30		HSV1-pS22-B02-I-13	2.53665	30					HSV1-pS22-C03-U-21	1.12681	30		HSV1-pS22-C05-I-23	2.56221	30
HSV1-pS22-A01-U-10	0.866667	31		HSV1-pS22-A04-I-14	3.2118	31					HSV1-pS22-B02-U-06	1.03149	31		HSV1-pS22-B03-I-11	2.53016	31					HSV1-pS22-C04-U-18	1.11345	31		HSV1-pS22-C01-I-13	2.56101	31
HSV1-pS22-A02-U-12	0.858451	32		HSV1-pS22-A04-I-11	3.13271	32					HSV1-pS22-B01-U-11	1.02852	32		HSV1-pS22-B02-I-20	2.52188	32					HSV1-pS22-C04-U-17	1.10313	32		HSV1-pS22-C02-I-12	2.54092	32
HSV1-pS22-A02-U-11	0.847316	33		HSV1-pS22-A01-I-20	3.09261	33					HSV1-pS22-B02-U-12	1.01641	33		HSV1-pS22-B03-I-07	2.51234	33					HSV1-pS22-C02-U-18	1.10142	33		HSV1-pS22-C01-I-12	2.53933	33
HSV1-pS22-A06-U-10	0.844205	34		HSV1-pS22-A05-I-01	3.053	34					HSV1-pS22-B02-U-19	0.995681	34		HSV1-pS22-B02-I-03	2.49141	34					HSV1-pS22-C05-U-13	1.09712	34		HSV1-pS22-C01-I-11	2.44098	34
HSV1-pS22-A06-U-09	0.840933	35		HSV1-pS22-A06-I-12	3.01325	35					HSV1-pS22-B02-U-15	0.994963	35		HSV1-pS22-B02-I-11	2.48156	35					HSV1-pS22-C01-U-17	1.08515	35		HSV1-pS22-C01-I-10	2.42757	35
HSV1-pS22-A04-U-05	0.829388	36		HSV1-pS22-A06-I-25	2.9648	36					HSV1-pS22-B02-U-05	0.991372	36		HSV1-pS22-B02-I-10	2.44062	36					HSV1-pS22-C01-U-16	1.07786	36		HSV1-pS22-C01-I-09	2.42359	36
HSV1-pS22-A03-U-07	0.775021	37		HSV1-pS22-A04-I-15	2.90594	37					HSV1-pS22-B01-U-16	0.985524	37		HSV1-pS22-B02-I-04	2.42021	37					HSV1-pS22-C02-U-17	1.07188	37		HSV1-pS22-C01-I-08	2.36651	37
HSV1-pS22-A03-U-02	0.766487	38		HSV1-pS22-A05-I-11	2.89334	38					HSV1-pS22-B02-U-16	0.9806	38		HSV1-pS22-B03-I-06	2.40988	38					HSV1-pS22-C01-U-15	1.06836	38		HSV1-pS22-C03-I-08	2.34022	38
HSV1-pS22-A01-U-05	0.765272	39		HSV1-pS22-A02-I-14	2.84547	39					HSV1-pS22-B03-U-01	0.955313	39		HSV1-pS22-B03-I-02	2.3866	39					HSV1-pS22-C03-U-20	1.0629	39		HSV1-pS22-C02-I-11	2.31451	39
HSV1-pS22-A04-U-02	0.764204	40		HSV1-pS22-A06-I-34	2.8365	40					HSV1-pS22-B02-U-09	0.952591	40		HSV1-pS22-B03-I-03	2.36836	40					HSV1-pS22-C02-U-16	1.0616	40		HSV1-pS22-C05-I-22	2.31446	40
HSV1-pS22-A06-U-08	0.762331	41		HSV1-pS22-A06-I-32	2.8342	41					HSV1-pS22-B03-U-09	0.935494	41		HSV1-pS22-B04-I-02	2.2571	41					HSV1-pS22-C04-U-16	1.05637	41		HSV1-pS22-C04-I-10	2.31062	41
HSV1-pS22-A05-U-02	0.759265	42		HSV1-pS22-A05-I-02	2.80257	42					HSV1-pS22-B03-U-06	0.927209	42		HSV1-pS22-B03-I-10	2.11343	42					HSV1-pS22-C02-U-15	1.05488	42		HSV1-pS22-C04-I-09	2.30706	42
HSV1-pS22-A04-U-03	0.720216	43		HSV1-pS22-A06-I-01	2.79495	43					HSV1-pS22-B01-U-26	0.920477	43		HSV1-pS22-B03-I-01	2.07935	43					HSV1-pS22-C01-U-14	1.05434	43		HSV1-pS22-C03-I-07	2.29508	43
HSV1-pS22-A05-U-04	0.719248	44		HSV1-pS22-A06-I-28	2.706	44					HSV1-pS22-B03-U-12	0.918401	44		HSV1-pS22-B01-I-08	2.04004	44					HSV1-pS22-C02-U-14	1.05337	44		HSV1-pS22-C02-I-10	2.25015	44
HSV1-pS22-A06-U-07	0.71432	45		HSV1-pS22-A05-I-17	2.67829	45					HSV1-pS22-B02-U-13	0.913195	45		HSV1-pS22-B01-I-06	2.01961	45					HSV1-pS22-C03-U-19	1.04711	45		HSV1-pS22-C04-I-08	2.22207	45
HSV1-pS22-A01-U-02	0.707658	46		HSV1-pS22-A02-I-27	2.65188	46					HSV1-pS22-B01-U-12	0.896703	46		HSV1-pS22-B03-I-09	1.98036	46					HSV1-pS22-C04-U-15	1.03978	46		HSV1-pS22-C05-I-21	2.21249	46
HSV1-pS22-A02-U-05	0.705786	47		HSV1-pS22-A05-I-14	2.64844	47					HSV1-pS22-B01-U-18	0.889926	47		HSV1-pS22-B02-I-22	1.92365	47					HSV1-pS22-C05-U-12	1.03489	47		HSV1-pS22-C02-I-09	2.17954	47
HSV1-pS22-A06-U-06	0.70371	48		HSV1-pS22-A06-I-19	2.60459	48					HSV1-pS22-B01-U-15	0.884665	48		HSV1-pS22-B04-I-11	1.84684	48					HSV1-pS22-C02-U-13	1.03425	48		HSV1-pS22-C05-I-20	2.14755	48
HSV1-pS22-A04-U-04	0.683066	49		HSV1-pS22-A01-I-15	2.56007	49					HSV1-pS22-B03-U-04	0.880545	49		HSV1-pS22-B01-I-04	1.73979	49					HSV1-pS22-C04-U-14	1.02198	49		HSV1-pS22-C03-I-06	2.10058	49
HSV1-pS22-A01-U-03	0.669219	50		HSV1-pS22-A01-I-11	2.5599	50					HSV1-pS22-B03-U-20	0.873309	50		HSV1-pS22-B04-I-17	1.72785	50					HSV1-pS22-C03-U-18	1.01783	50		HSV1-pS22-C05-I-19	2.09137	50
HSV1-pS22-A02-U-04	0.665543	51		HSV1-pS22-A06-I-24	2.52536	51					HSV1-pS22-B02-U-02	0.868669	51		HSV1-pS22-B04-I-23	1.72666	51					HSV1-pS22-C01-U-13	1.00627	51		HSV1-pS22-C03-I-05	2.08142	51
HSV1-pS22-A02-U-07	0.656895	52		HSV1-pS22-A05-I-03	2.50106	52					HSV1-pS22-B01-U-19	0.862915	52		HSV1-pS22-B03-I-17	1.70693	52					HSV1-pS22-C03-U-17	0.999439	52		HSV1-pS22-C01-I-07	2.01719	52
HSV1-pS22-A05-U-05	0.650357	53		HSV1-pS22-A02-I-11	2.49424	53					HSV1-pS22-B03-U-25	0.856426	53		HSV1-pS22-B04-I-22	1.55286	53					HSV1-pS22-C03-U-16	0.995914	53		HSV1-pS22-C01-I-06	2.01253	53
HSV1-pS22-A06-U-05	0.633684	54		HSV1-pS22-A05-I-10	2.49155	54					HSV1-pS22-B03-U-21	0.851497	54		HSV1-pS22-B04-I-24	1.47414	54					HSV1-pS22-C02-U-12	0.995038	54		HSV1-pS22-C01-I-05	2.00365	54
HSV1-pS22-A06-U-04	0.62776	55		HSV1-pS22-A06-I-30	2.46542	55					HSV1-pS22-B02-U-18	0.848355	55		HSV1-pS22-B01-I-05	1.46989	55					HSV1-pS22-C02-U-11	0.97982	55		HSV1-pS22-C05-I-18	1.99111	55
HSV1-pS22-A06-U-03	0.613879	56		HSV1-pS22-A04-I-08	2.39973	56					HSV1-pS22-B02-U-10	0.843226	56		HSV1-pS22-B04-I-07	1.46587	56					HSV1-pS22-C04-U-13	0.979416	56		HSV1-pS22-C03-I-04	1.98064	56
HSV1-pS22-A06-U-02	0.611933	57		HSV1-pS22-A04-I-04	2.36919	57					HSV1-pS22-B01-U-17	0.835298	57		HSV1-pS22-B04-I-18	1.46198	57					HSV1-pS22-C03-U-15	0.977444	57		HSV1-pS22-C02-I-08	1.91913	57
HSV1-pS22-A02-U-02	0.60919	58		HSV1-pS22-A06-I-33	2.35428	58					HSV1-pS22-B03-U-26	0.833146	58		HSV1-pS22-B04-I-20	1.43508	58					HSV1-pS22-C05-U-11	0.976184	58		HSV1-pS22-C02-I-07	1.86169	58
HSV1-pS22-A02-U-01	0.596756	59		HSV1-pS22-A04-I-03	2.33706	59					HSV1-pS22-B03-U-02	0.819933	59		HSV1-pS22-B04-I-19	1.32725	59					HSV1-pS22-C05-U-10	0.960287	59		HSV1-pS22-C02-I-06	1.849	59
HSV1-pS22-A02-U-10	0.596303	60		HSV1-pS22-A01-I-04	2.33557	60					HSV1-pS22-B03-U-28	0.798331	60		HSV1-pS22-B01-I-07	1.27596	60					HSV1-pS22-C01-U-12	0.958558	60		HSV1-pS22-C04-I-07	1.83276	60
HSV1-pS22-A05-U-03	0.586835	61		HSV1-pS22-A05-I-08	2.32343	61					HSV1-pS22-B04-U-02	0.782461	61		HSV1-pS22-B02-I-18	1.2731	61					HSV1-pS22-C02-U-10	0.953429	61		HSV1-pS22-C05-I-17	1.83233	61
HSV1-pS22-A06-U-01	0.548096	62		HSV1-pS22-A01-I-07	2.31061	62					HSV1-pS22-B02-U-07	0.777668	62		HSV1-pS22-B04-I-16	1.21863	62					HSV1-pS22-C05-U-09	0.9527	62		HSV1-pS22-C02-I-05	1.82536	62
HSV1-pS22-A01-U-04	0.528511	63		HSV1-pS22-A05-I-06	2.30651	63					HSV1-pS22-B01-U-06	0.772476	63		HSV1-pS22-B02-I-01	1.20928	63					HSV1-pS22-C02-U-09	0.949316	63		HSV1-pS22-C04-I-06	1.79845	63
HSV1-pS22-A03-U-03	0.510528	64		HSV1-pS22-A05-I-20	2.27641	64					HSV1-pS22-B01-U-14	0.76843	64		HSV1-pS22-B01-I-10	1.17753	64					HSV1-pS22-C03-U-14	0.947785	64		HSV1-pS22-C03-I-03	1.76076	64
HSV1-pS22-A05-U-01	0.471338	65		HSV1-pS22-A05-I-19	2.26015	65					HSV1-pS22-B03-U-07	0.759636	65		HSV1-pS22-B02-I-02	1.16691	65					HSV1-pS22-C05-U-08	0.946107	65		HSV1-pS22-C02-I-04	1.75619	65
HSV1-pS22-A03-U-01	0.432332	66		HSV1-pS22-A04-I-06	2.25615	66					HSV1-pS22-B01-U-20	0.758414	66		HSV1-pS22-B01-I-11	1.13049	66					HSV1-pS22-C04-U-12	0.941902	66		HSV1-pS22-C01-I-04	1.71826	66
HSV1-pS22-A02-U-03	0.389547	67		HSV1-pS22-A04-I-07	2.24862	67					HSV1-pS22-B02-U-04	0.754789	67		HSV1-pS22-B04-I-09	1.12237	67					HSV1-pS22-C03-U-13	0.938052	67		HSV1-pS22-C04-I-05	1.69268	67
				HSV1-pS22-A01-I-21	2.23286	68					HSV1-pS22-B04-U-05	0.727155	68		HSV1-pS22-B01-I-09	1.09114	68					HSV1-pS22-C03-U-12	0.937975	68		HSV1-pS22-C02-I-03	1.68901	68
				HSV1-pS22-A01-I-05	2.20528	69					HSV1-pS22-B01-U-08	0.721187	69		HSV1-pS22-B04-I-06	1.08849	69					HSV1-pS22-C03-U-11	0.937515	69		HSV1-pS22-C02-I-02	1.60059	69
				HSV1-pS22-A03-I-16	2.17085	70					HSV1-pS22-B01-U-21	0.719669	70		HSV1-pS22-B04-I-04	1.04245	70					HSV1-pS22-C02-U-08	0.931151	70		HSV1-pS22-C01-I-03	1.56669	70
				HSV1-pS22-A06-I-11	2.11184	71					HSV1-pS22-B01-U-27	0.697919	71		HSV1-pS22-B04-I-15	1.03418	71					HSV1-pS22-C04-U-11	0.923608	71		HSV1-pS22-C05-I-16	1.56263	71
				HSV1-pS22-A02-I-10	2.09899	72					HSV1-pS22-B01-U-04	0.697515	72		HSV1-pS22-B04-I-05	1.0294	72					HSV1-pS22-C03-U-10	0.915137	72		HSV1-pS22-C05-I-15	1.54285	72
				HSV1-pS22-A03-I-12	2.09742	73					HSV1-pS22-B02-U-11	0.697439	73		HSV1-pS22-B04-I-03	0.884604	73					HSV1-pS22-C01-U-11	0.91477	73		HSV1-pS22-C03-I-02	1.4585	73
				HSV1-pS22-A03-I-04	2.09722	74					HSV1-pS22-B01-U-10	0.688309	74		HSV1-pS22-B04-I-21	0.723866	74					HSV1-pS22-C05-U-07	0.902934	74		HSV1-pS22-C02-I-01	1.45184	74
				HSV1-pS22-A01-I-13	2.09014	75					HSV1-pS22-B04-U-04	0.683009	75									HSV1-pS22-C05-U-06	0.901308	75		HSV1-pS22-C05-I-14	1.40954	75
				HSV1-pS22-A05-I-15	2.08454	76					HSV1-pS22-B03-U-14	0.674801	76									HSV1-pS22-C03-U-09	0.892299	76		HSV1-pS22-C04-I-04	1.39029	76
				HSV1-pS22-A06-I-21	2.07293	77					HSV1-pS22-B01-U-05	0.658061	77									HSV1-pS22-C02-U-07	0.885773	77		HSV1-pS22-C03-I-01	1.38608	77
				HSV1-pS22-A06-I-05	2.0564	78					HSV1-pS22-B03-U-24	0.645754	78									HSV1-pS22-C04-U-10	0.880328	78		HSV1-pS22-C05-I-13	1.37206	78
				HSV1-pS22-A05-I-18	2.04095	79					HSV1-pS22-B03-U-19	0.639881	79									HSV1-pS22-C03-U-08	0.876665	79		HSV1-pS22-C05-I-12	1.33972	79
				HSV1-pS22-A06-I-10	1.97187	80					HSV1-pS22-B02-U-08	0.636292	80									HSV1-pS22-C04-U-09	0.857264	80		HSV1-pS22-C05-I-11	1.33349	80
				HSV1-pS22-A01-I-10	1.96869	81					HSV1-pS22-B01-U-13	0.630343	81									HSV1-pS22-C03-U-07	0.857045	81		HSV1-pS22-C05-I-10	1.3334	81
				HSV1-pS22-A02-I-05	1.96441	82					HSV1-pS22-B01-U-22	0.628218	82									HSV1-pS22-C01-U-10	0.856529	82		HSV1-pS22-C05-I-09	1.30838	82
				HSV1-pS22-A06-I-20	1.95127	83					HSV1-pS22-B01-U-09	0.628016	83									HSV1-pS22-C05-U-05	0.855515	83		HSV1-pS22-C05-I-08	1.30278	83
				HSV1-pS22-A04-I-16	1.94413	84					HSV1-pS22-B01-U-01	0.625386	84									HSV1-pS22-C02-U-06	0.844918	84		HSV1-pS22-C04-I-03	1.3001	84
				HSV1-pS22-A03-I-02	1.93997	85					HSV1-pS22-B01-U-24	0.618203	85									HSV1-pS22-C04-U-08	0.843953	85		HSV1-pS22-C05-I-07	1.21192	85
				HSV1-pS22-A06-I-06	1.91034	86					HSV1-pS22-B01-U-02	0.614966	86									HSV1-pS22-C03-U-06	0.842867	86		HSV1-pS22-C01-I-02	1.20885	86
				HSV1-pS22-A02-I-23	1.90337	87					HSV1-pS22-B02-U-01	0.595562	87									HSV1-pS22-C05-U-04	0.838626	87		HSV1-pS22-C05-I-06	1.16062	87
				HSV1-pS22-A03-I-08	1.89234	88					HSV1-pS22-B04-U-10	0.527354	88									HSV1-pS22-C04-U-07	0.832421	88		HSV1-pS22-C05-I-05	1.14391	88
				HSV1-pS22-A02-I-16	1.89088	89					HSV1-pS22-B04-U-01	0.507225	89									HSV1-pS22-C02-U-05	0.832237	89		HSV1-pS22-C05-I-04	1.13723	89
				HSV1-pS22-A01-I-01	1.88779	90					HSV1-pS22-B04-U-08	0.439362	90									HSV1-pS22-C02-U-04	0.832169	90		HSV1-pS22-C01-I-01	1.09874	90
				HSV1-pS22-A01-I-03	1.88201	91																HSV1-pS22-C03-U-05	0.826696	91		HSV1-pS22-C05-I-03	1.09423	91
				HSV1-pS22-A01-I-18	1.85679	92																HSV1-pS22-C02-U-03	0.817431	92		HSV1-pS22-C05-I-02	1.07743	92
				HSV1-pS22-A05-I-12	1.84957	93																HSV1-pS22-C05-U-03	0.814871	93		HSV1-pS22-C04-I-02	0.985893	93
				HSV1-pS22-A06-I-16	1.83987	94																HSV1-pS22-C01-U-09	0.811761	94		HSV1-pS22-C05-I-01	0.963177	94
				HSV1-pS22-A05-I-16	1.82468	95																HSV1-pS22-C03-U-04	0.803015	95		HSV1-pS22-C04-I-01	0.89848	95
				HSV1-pS22-A02-I-17	1.79524	96																HSV1-pS22-C01-U-08	0.80233	96
				HSV1-pS22-A04-I-17	1.77273	97																HSV1-pS22-C04-U-06	0.800531	97
				HSV1-pS22-A03-I-17	1.73892	98																HSV1-pS22-C04-U-05	0.798182	98
				HSV1-pS22-A02-I-01	1.73844	99																HSV1-pS22-C04-U-04	0.780315	99
				HSV1-pS22-A06-I-08	1.73501	100																HSV1-pS22-C05-U-02	0.776937	100
				HSV1-pS22-A02-I-03	1.72397	101																HSV1-pS22-C01-U-07	0.762033	101
				HSV1-pS22-A06-I-17	1.71688	102																HSV1-pS22-C05-U-01	0.735931	102
				HSV1-pS22-A02-I-15	1.71351	103																HSV1-pS22-C04-U-03	0.72828	103
				HSV1-pS22-A02-I-06	1.68457	104																HSV1-pS22-C01-U-06	0.720327	104
				HSV1-pS22-A05-I-13	1.6603	105																HSV1-pS22-C02-U-02	0.712964	105
				HSV1-pS22-A06-I-18	1.65932	106																HSV1-pS22-C03-U-03	0.686295	106
				HSV1-pS22-A06-I-29	1.619	107																HSV1-pS22-C01-U-05	0.684317	107
				HSV1-pS22-A03-I-13	1.6072	108																HSV1-pS22-C03-U-02	0.682157	108
				HSV1-pS22-A02-I-20	1.58334	109																HSV1-pS22-C03-U-01	0.678785	109
				HSV1-pS22-A06-I-07	1.5686	110																HSV1-pS22-C02-U-01	0.668614	110
				HSV1-pS22-A02-I-22	1.56232	111																HSV1-pS22-C01-U-04	0.662637	111
				HSV1-pS22-A02-I-21	1.49325	112																HSV1-pS22-C01-U-03	0.641264	112
				HSV1-pS22-A05-I-23	1.4633	113																HSV1-pS22-C01-U-02	0.63961	113
				HSV1-pS22-A03-I-21	1.4557	114																HSV1-pS22-C04-U-02	0.63446	114
				HSV1-pS22-A03-I-15	1.4516	115																HSV1-pS22-C01-U-01	0.619094	115
				HSV1-pS22-A04-I-02	1.44545	116																HSV1-pS22-C04-U-01	0.579648	116
				HSV1-pS22-A02-I-02	1.43859	117
				HSV1-pS22-A01-I-06	1.30595	118
				HSV1-pS22-A01-I-12	1.28617	119
				HSV1-pS22-A03-I-20	1.26643	120
				HSV1-pS22-A06-I-31	1.25039	121
				HSV1-pS22-A02-I-25	1.23409	122
				HSV1-pS22-A03-I-05	1.21847	123
				HSV1-pS22-A03-I-07	1.20047	124
				HSV1-pS22-A06-I-09	1.18514	125
				HSV1-pS22-A02-I-26	1.13462	126
				HSV1-pS22-A03-I-11	1.12558	127
				HSV1-pS22-A02-I-07	1.10443	128
				HSV1-pS22-A03-I-14	1.09595	129
				HSV1-pS22-A02-I-13	1.09381	130
				HSV1-pS22-A03-I-19	1.08417	131
				HSV1-pS22-A03-I-10	1.07597	132
				HSV1-pS22-A05-I-09	1.04833	133
				HSV1-pS22-A02-I-12	0.950129	134
				HSV1-pS22-A04-I-01	0.940156	135
				HSV1-pS22-A02-I-08	0.898751	136
				HSV1-pS22-A06-I-26	0.896901	137
				HSV1-pS22-A03-I-03	0.893243	138
				HSV1-pS22-A03-I-06	0.850373	139
				HSV1-pS22-A06-I-14	0.805832	140
				HSV1-pS22-A03-I-18	0.770986	141
				HSV1-pS22-A02-I-18	0.769768	142
				HSV1-pS22-A02-I-24	0.743882	143
				HSV1-pS22-A03-I-01	0.732152	144
				HSV1-pS22-A02-I-19	0.720482	145
				HSV1-pS22-A02-I-04	0.708499	146

## Sheet: HSV1delUS3
HSV1DUS3-pS22-A											HSV1DUS3-pS22-B											HSV1DUS3-pS22-C
Uninfected				Infected							Uninfected				Infected
#	pS22	n=		#	pS22	n=					#	pS22	n=		#	pS22	n=					#	pS22	n=		#	pS22	n=
DUS3-pS22-A02-U-03	1.72322	1		DUS3-pS22-A04-I-11	3.31476	1		Uninfected (HSV1DUS3-pS22-A)			DUS3-pS22-B01-U-06	2.05206	1		DUS3-pS22-B02-I-22	2.8608	1		Uninfected (HSV1DUS3-pS22-B)			DUS3-pS22-C02-U-04	2.50805	1		DUS3-pS22-C03-I-08	4.52574	1		Uninfected (HSV1DUS3-pS22-C)
DUS3-pS22-A02-U-01	1.64202	2		DUS3-pS22-A04-I-17	2.90466	2		Mean	1		DUS3-pS22-B03-U-06	1.81129	2		DUS3-pS22-B01-I-10	2.8278	2		Mean	1		DUS3-pS22-C01-U-01	2.10222	2		DUS3-pS22-C03-I-16	3.22342	2		Mean	1
DUS3-pS22-A03-U-02	1.6116	3		DUS3-pS22-A04-I-21	2.64246	3		SD	0.353582		DUS3-pS22-B03-U-27	1.71974	3		DUS3-pS22-B01-I-17	2.75112	3		SD	0.298831		DUS3-pS22-C02-U-09	1.7279	3		DUS3-pS22-C02-I-26	3.18926	3		SD	0.488189
DUS3-pS22-A01-U-06	1.46684	4		DUS3-pS22-A04-I-33	2.56124	4		n=	33		DUS3-pS22-B03-U-19	1.6864	4		DUS3-pS22-B02-I-16	2.71082	4		n=	60		DUS3-pS22-C02-U-07	1.68125	4		DUS3-pS22-C01-I-05	2.95561	4		n=	35
DUS3-pS22-A04-U-12	1.4586	5		DUS3-pS22-A04-I-13	2.49997	5		Increased	0.181818		DUS3-pS22-B02-U-18	1.63761	5		DUS3-pS22-B01-I-18	2.70445	5		Increased	0.133333		DUS3-pS22-C03-U-05	1.66416	5		DUS3-pS22-C02-I-19	2.7303	5		Increased	0.171429
DUS3-pS22-A04-U-09	1.39647	6		DUS3-pS22-A03-I-05	2.49266	6					DUS3-pS22-B03-U-22	1.51209	6		DUS3-pS22-B03-I-10	2.52247	6					DUS3-pS22-C04-U-06	1.54253	6		DUS3-pS22-C01-I-10	2.54984	6
DUS3-pS22-A01-U-10	1.28777	7		DUS3-pS22-A04-I-32	2.47973	7					DUS3-pS22-B02-U-20	1.38582	7		DUS3-pS22-B02-I-26	2.14917	7					DUS3-pS22-C04-U-10	1.43342	7		DUS3-pS22-C02-I-09	2.48695	7
DUS3-pS22-A01-U-05	1.26489	8		DUS3-pS22-A04-I-07	2.28565	8		Infected (HSV1DUS3-pS22-A)			DUS3-pS22-B02-U-14	1.34151	8		DUS3-pS22-B01-I-21	2.0736	8		Infected (HSV1DUS3-pS22-B)			DUS3-pS22-C04-U-11	1.3591	8		DUS3-pS22-C03-I-07	2.45478	8		Infected (HSV1DUS3-pS22-C)
DUS3-pS22-A01-U-04	1.23499	9		DUS3-pS22-A04-I-27	2.18676	9		mean	1.39591		DUS3-pS22-B02-U-19	1.22098	9		DUS3-pS22-B02-I-07	2.02479	9		mean	1.48892		DUS3-pS22-C04-U-08	1.21633	9		DUS3-pS22-C02-I-17	2.44894	9		mean	1.36819
DUS3-pS22-A04-U-01	1.18472	10		DUS3-pS22-A04-I-18	2.13574	10		SD	0.654057		DUS3-pS22-B02-U-12	1.21878	10		DUS3-pS22-B02-I-33	2.01076	10		SD	0.472928		DUS3-pS22-C03-U-07	1.20491	10		DUS3-pS22-C02-I-16	2.19195	10		SD	0.649238
DUS3-pS22-A01-U-07	1.18397	11		DUS3-pS22-A04-I-03	2.1289	11		n=	77		DUS3-pS22-B02-U-13	1.2108	11		DUS3-pS22-B02-I-23	1.98186	11		n=	91		DUS3-pS22-C01-U-04	1.10804	11		DUS3-pS22-C01-I-23	2.14964	11		n=	98
DUS3-pS22-A02-U-06	1.18291	12		DUS3-pS22-A04-I-25	2.11152	12		Increased	0.519481		DUS3-pS22-B03-U-11	1.19136	12		DUS3-pS22-B01-I-03	1.97282	12		Increased	0.593407		DUS3-pS22-C01-U-02	0.953641	12		DUS3-pS22-C03-I-15	2.13657	12		Increased	0.265306
DUS3-pS22-A04-U-13	1.13399	13		DUS3-pS22-A04-I-22	2.09528	13					DUS3-pS22-B02-U-21	1.09908	13		DUS3-pS22-B02-I-24	1.96012	13					DUS3-pS22-C03-U-06	0.93965	13		DUS3-pS22-C02-I-08	2.0028	13
DUS3-pS22-A01-U-02	0.987539	14		DUS3-pS22-A04-I-31	2.01035	14					DUS3-pS22-B03-U-30	1.09587	14		DUS3-pS22-B02-I-29	1.9172	14					DUS3-pS22-C03-U-03	0.919501	14		DUS3-pS22-C04-I-01	1.93312	14
DUS3-pS22-A04-U-07	0.932215	15		DUS3-pS22-A04-I-34	1.95848	15					DUS3-pS22-B03-U-14	1.07647	15		DUS3-pS22-B02-I-27	1.89738	15					DUS3-pS22-C01-U-07	0.908182	15		DUS3-pS22-C03-I-18	1.8445	15
DUS3-pS22-A04-U-08	0.924805	16		DUS3-pS22-A04-I-04	1.9391	16					DUS3-pS22-B03-U-02	1.06131	16		DUS3-pS22-B01-I-01	1.88691	16					DUS3-pS22-C04-U-09	0.904444	16		DUS3-pS22-C03-I-17	1.8052	16
DUS3-pS22-A01-U-09	0.903051	17		DUS3-pS22-A04-I-14	1.90433	17					DUS3-pS22-B03-U-32	1.05525	17		DUS3-pS22-B03-I-20	1.87526	17					DUS3-pS22-C04-U-04	0.885418	17		DUS3-pS22-C03-I-14	1.78822	17
DUS3-pS22-A04-U-04	0.894596	18		DUS3-pS22-A04-I-02	1.88125	18					DUS3-pS22-B02-U-08	1.05092	18		DUS3-pS22-B01-I-25	1.84075	18					DUS3-pS22-C04-U-07	0.885093	18		DUS3-pS22-C03-I-24	1.72411	18
DUS3-pS22-A04-U-06	0.880061	19		DUS3-pS22-A04-I-37	1.87156	19					DUS3-pS22-B03-U-29	1.02797	19		DUS3-pS22-B01-I-24	1.80049	19					DUS3-pS22-C01-U-05	0.846015	19		DUS3-pS22-C04-I-02	1.6414	19
DUS3-pS22-A04-U-10	0.844152	20		DUS3-pS22-A01-I-09	1.79719	20					DUS3-pS22-B02-U-02	1.01185	20		DUS3-pS22-B02-I-11	1.79061	20					DUS3-pS22-C03-U-04	0.830915	20		DUS3-pS22-C01-I-24	1.6175	20
DUS3-pS22-A04-U-11	0.843582	21		DUS3-pS22-A02-I-08	1.78936	21					DUS3-pS22-B02-U-17	0.990931	21		DUS3-pS22-B02-I-10	1.7752	21					DUS3-pS22-C01-U-03	0.792284	21		DUS3-pS22-C03-I-20	1.60105	21
DUS3-pS22-A04-U-05	0.839877	22		DUS3-pS22-A04-I-30	1.68916	22					DUS3-pS22-B01-U-05	0.980639	22		DUS3-pS22-B03-I-08	1.76158	22					DUS3-pS22-C04-U-01	0.741832	22		DUS3-pS22-C01-I-14	1.60079	22
DUS3-pS22-A02-U-04	0.834589	23		DUS3-pS22-A04-I-26	1.66693	23					DUS3-pS22-B02-U-04	0.969192	23		DUS3-pS22-B03-I-01	1.75551	23					DUS3-pS22-C04-U-05	0.740694	23		DUS3-pS22-C03-I-22	1.5884	23
DUS3-pS22-A04-U-02	0.833607	24		DUS3-pS22-A03-I-16	1.63904	24					DUS3-pS22-B03-U-28	0.968246	24		DUS3-pS22-B01-I-29	1.74612	24					DUS3-pS22-C03-U-02	0.724678	24		DUS3-pS22-C02-I-24	1.55375	24
DUS3-pS22-A04-U-03	0.833322	25		DUS3-pS22-A04-I-15	1.60936	25					DUS3-pS22-B03-U-24	0.950966	25		DUS3-pS22-B02-I-17	1.7364	25					DUS3-pS22-C03-U-01	0.716185	25		DUS3-pS22-C02-I-03	1.54511	25
DUS3-pS22-A01-U-03	0.744974	26		DUS3-pS22-A04-I-19	1.56433	26					DUS3-pS22-B02-U-11	0.948829	26		DUS3-pS22-B02-I-03	1.71356	26					DUS3-pS22-C02-U-06	0.704672	26		DUS3-pS22-C02-I-02	1.53338	26
DUS3-pS22-A03-U-03	0.744635	27		DUS3-pS22-A04-I-05	1.55464	27					DUS3-pS22-B03-U-03	0.931262	27		DUS3-pS22-B02-I-36	1.67201	27					DUS3-pS22-C04-U-02	0.700041	27		DUS3-pS22-C03-I-06	1.48765	27
DUS3-pS22-A01-U-08	0.668174	28		DUS3-pS22-A04-I-09	1.54239	28					DUS3-pS22-B02-U-07	0.92874	28		DUS3-pS22-B01-I-19	1.66842	28					DUS3-pS22-C02-U-02	0.694215	28		DUS3-pS22-C02-I-14	1.45745	28
DUS3-pS22-A03-U-01	0.643765	29		DUS3-pS22-A02-I-03	1.54165	29					DUS3-pS22-B03-U-16	0.920652	29		DUS3-pS22-B03-I-15	1.65063	29					DUS3-pS22-C02-U-10	0.608006	29		DUS3-pS22-C03-I-11	1.43387	29
DUS3-pS22-A02-U-02	0.599202	30		DUS3-pS22-A01-I-07	1.52328	30					DUS3-pS22-B01-U-04	0.911399	30		DUS3-pS22-B02-I-20	1.62413	30					DUS3-pS22-C04-U-03	0.591092	30		DUS3-pS22-C03-I-05	1.43254	30
DUS3-pS22-A02-U-07	0.5956	31		DUS3-pS22-A03-I-08	1.51622	31					DUS3-pS22-B03-U-31	0.908223	31		DUS3-pS22-B03-I-17	1.61213	31					DUS3-pS22-C02-U-08	0.545441	31		DUS3-pS22-C01-I-09	1.43042	31
DUS3-pS22-A02-U-05	0.422464	32		DUS3-pS22-A03-I-11	1.48055	32					DUS3-pS22-B03-U-04	0.905495	32		DUS3-pS22-B02-I-32	1.59826	32					DUS3-pS22-C02-U-01	0.541076	32		DUS3-pS22-C04-I-17	1.42773	32
DUS3-pS22-A01-U-01	0.257808	33		DUS3-pS22-A04-I-29	1.46088	33					DUS3-pS22-B02-U-10	0.897094	33		DUS3-pS22-B01-I-27	1.59226	33					DUS3-pS22-C02-U-03	0.521798	33		DUS3-pS22-C03-I-09	1.40473	33
				DUS3-pS22-A04-I-24	1.43352	34					DUS3-pS22-B03-U-13	0.892459	34		DUS3-pS22-B03-I-18	1.54634	34					DUS3-pS22-C02-U-05	0.467599	34		DUS3-pS22-C02-I-25	1.39989	34
				DUS3-pS22-A04-I-16	1.42326	35					DUS3-pS22-B02-U-09	0.882785	35		DUS3-pS22-B02-I-21	1.53882	35					DUS3-pS22-C01-U-06	0.289622	35		DUS3-pS22-C02-I-07	1.38306	35
				DUS3-pS22-A02-I-13	1.40832	36					DUS3-pS22-B03-U-18	0.874271	36		DUS3-pS22-B01-I-26	1.51814	36									DUS3-pS22-C01-I-01	1.35973	36
				DUS3-pS22-A03-I-01	1.40766	37					DUS3-pS22-B03-U-17	0.873058	37		DUS3-pS22-B02-I-25	1.48598	37									DUS3-pS22-C02-I-10	1.35151	37
				DUS3-pS22-A03-I-06	1.39751	38					DUS3-pS22-B03-U-23	0.863357	38		DUS3-pS22-B02-I-08	1.46342	38									DUS3-pS22-C02-I-06	1.34378	38
				DUS3-pS22-A03-I-14	1.36329	39					DUS3-pS22-B03-U-12	0.846987	39		DUS3-pS22-B03-I-22	1.46268	39									DUS3-pS22-C02-I-21	1.34141	39
				DUS3-pS22-A03-I-04	1.35638	40					DUS3-pS22-B03-U-09	0.845169	40		DUS3-pS22-B02-I-38	1.46122	40									DUS3-pS22-C03-I-03	1.34045	40
				DUS3-pS22-A04-I-35	1.33035	41					DUS3-pS22-B03-U-01	0.842743	41		DUS3-pS22-B01-I-02	1.46121	41									DUS3-pS22-C01-I-13	1.33008	41
				DUS3-pS22-A03-I-03	1.31545	42					DUS3-pS22-B03-U-26	0.842137	42		DUS3-pS22-B02-I-12	1.45186	42									DUS3-pS22-C04-I-16	1.32414	42
				DUS3-pS22-A02-I-07	1.30763	43					DUS3-pS22-B03-U-05	0.841834	43		DUS3-pS22-B03-I-21	1.43873	43									DUS3-pS22-C04-I-13	1.32382	43
				DUS3-pS22-A04-I-08	1.26794	44					DUS3-pS22-B03-U-08	0.837893	44		DUS3-pS22-B02-I-14	1.42572	44									DUS3-pS22-C02-I-04	1.30322	44
				DUS3-pS22-A04-I-28	1.24428	45					DUS3-pS22-B03-U-20	0.808488	45		DUS3-pS22-B01-I-16	1.42146	45									DUS3-pS22-C01-I-18	1.30297	45
				DUS3-pS22-A04-I-36	1.23003	46					DUS3-pS22-B03-U-07	0.787874	46		DUS3-pS22-B02-I-18	1.40783	46									DUS3-pS22-C03-I-21	1.28817	46
				DUS3-pS22-A04-I-23	1.2155	47					DUS3-pS22-B03-U-25	0.77393	47		DUS3-pS22-B02-I-09	1.3938	47									DUS3-pS22-C03-I-10	1.28717	47
				DUS3-pS22-A02-I-11	1.17949	48					DUS3-pS22-B02-U-06	0.771611	48		DUS3-pS22-B02-I-34	1.36078	48									DUS3-pS22-C02-I-20	1.24675	48
				DUS3-pS22-A04-I-12	1.16506	49					DUS3-pS22-B03-U-15	0.769989	49		DUS3-pS22-B01-I-12	1.36017	49									DUS3-pS22-C02-I-18	1.23802	49
				DUS3-pS22-A02-I-10	1.14678	50					DUS3-pS22-B02-U-01	0.760329	50		DUS3-pS22-B03-I-19	1.359	50									DUS3-pS22-C01-I-19	1.23376	50
				DUS3-pS22-A02-I-04	1.0779	51					DUS3-pS22-B02-U-05	0.75455	51		DUS3-pS22-B03-I-11	1.35536	51									DUS3-pS22-C02-I-23	1.22583	51
				DUS3-pS22-A01-I-05	1.04512	52					DUS3-pS22-B03-U-21	0.7518	52		DUS3-pS22-B02-I-28	1.35059	52									DUS3-pS22-C01-I-07	1.19617	52
				DUS3-pS22-A04-I-20	1.03909	53					DUS3-pS22-B02-U-03	0.751798	53		DUS3-pS22-B03-I-07	1.34869	53									DUS3-pS22-C04-I-19	1.18576	53
				DUS3-pS22-A04-I-10	0.987504	54					DUS3-pS22-B02-U-16	0.735012	54		DUS3-pS22-B01-I-28	1.34735	54									DUS3-pS22-C01-I-17	1.17479	54
				DUS3-pS22-A02-I-02	0.984561	55					DUS3-pS22-B02-U-15	0.730884	55		DUS3-pS22-B03-I-14	1.29716	55									DUS3-pS22-C03-I-12	1.16994	55
				DUS3-pS22-A01-I-06	0.97881	56					DUS3-pS22-B03-U-10	0.725426	56		DUS3-pS22-B03-I-04	1.28412	56									DUS3-pS22-C02-I-22	1.16818	56
				DUS3-pS22-A01-I-02	0.954838	57					DUS3-pS22-B02-U-22	0.700889	57		DUS3-pS22-B02-I-31	1.28345	57									DUS3-pS22-C01-I-08	1.16062	57
				DUS3-pS22-A04-I-01	0.94162	58					DUS3-pS22-B01-U-02	0.698038	58		DUS3-pS22-B01-I-13	1.28068	58									DUS3-pS22-C04-I-15	1.15861	58
				DUS3-pS22-A01-I-01	0.851715	59					DUS3-pS22-B01-U-01	0.687524	59		DUS3-pS22-B02-I-35	1.27272	59									DUS3-pS22-C04-I-12	1.14641	59
				DUS3-pS22-A03-I-12	0.84964	60					DUS3-pS22-B01-U-03	0.670342	60		DUS3-pS22-B01-I-23	1.26016	60									DUS3-pS22-C01-I-22	1.13547	60
				DUS3-pS22-A02-I-12	0.822773	61									DUS3-pS22-B02-I-06	1.25951	61									DUS3-pS22-C02-I-01	1.13335	61
				DUS3-pS22-A04-I-06	0.815083	62									DUS3-pS22-B01-I-14	1.25324	62									DUS3-pS22-C04-I-08	1.13308	62
				DUS3-pS22-A01-I-03	0.808612	63									DUS3-pS22-B03-I-03	1.25229	63									DUS3-pS22-C03-I-13	1.12931	63
				DUS3-pS22-A02-I-05	0.799573	64									DUS3-pS22-B01-I-04	1.24272	64									DUS3-pS22-C04-I-09	1.12007	64
				DUS3-pS22-A03-I-09	0.708869	65									DUS3-pS22-B03-I-12	1.21349	65									DUS3-pS22-C04-I-03	1.08494	65
				DUS3-pS22-A03-I-02	0.656049	66									DUS3-pS22-B02-I-13	1.20722	66									DUS3-pS22-C03-I-04	1.07786	66
				DUS3-pS22-A01-I-04	0.650309	67									DUS3-pS22-B03-I-02	1.20379	67									DUS3-pS22-C04-I-10	1.05275	67
				DUS3-pS22-A03-I-10	0.645576	68									DUS3-pS22-B01-I-08	1.19297	68									DUS3-pS22-C02-I-05	1.04014	68
				DUS3-pS22-A03-I-13	0.610926	69									DUS3-pS22-B03-I-09	1.14377	69									DUS3-pS22-C04-I-14	1.01209	69
				DUS3-pS22-A02-I-01	0.598518	70									DUS3-pS22-B02-I-19	1.12467	70									DUS3-pS22-C02-I-13	1.00367	70
				DUS3-pS22-A02-I-09	0.519875	71									DUS3-pS22-B03-I-05	1.12012	71									DUS3-pS22-C01-I-12	1.0036	71
				DUS3-pS22-A02-I-06	0.494658	72									DUS3-pS22-B02-I-30	1.11862	72									DUS3-pS22-C02-I-15	0.993762	72
				DUS3-pS22-A01-I-08	0.352202	73									DUS3-pS22-B01-I-09	1.1163	73									DUS3-pS22-C01-I-20	0.958309	73
				DUS3-pS22-A03-I-07	0.346677	74									DUS3-pS22-B01-I-30	1.08296	74									DUS3-pS22-C02-I-11	0.953477	74
				DUS3-pS22-A01-I-10	0.342839	75									DUS3-pS22-B02-I-02	1.07734	75									DUS3-pS22-C04-I-11	0.933876	75
				DUS3-pS22-A03-I-17	0.329413	76									DUS3-pS22-B01-I-22	1.06655	76									DUS3-pS22-C01-I-04	0.901548	76
				DUS3-pS22-A03-I-15	0.300679	77									DUS3-pS22-B03-I-16	1.04433	77									DUS3-pS22-C04-I-21	0.898915	77
															DUS3-pS22-B02-I-37	1.03799	78									DUS3-pS22-C02-I-12	0.898005	78
															DUS3-pS22-B01-I-20	1.03449	79									DUS3-pS22-C04-I-20	0.891272	79
Note: Marker line indicates values over threshold (mean + SD uninfected)															DUS3-pS22-B01-I-15	1.00808	80									DUS3-pS22-C03-I-25	0.872377	80
															DUS3-pS22-B03-I-06	0.996438	81									DUS3-pS22-C04-I-18	0.859726	81
															DUS3-pS22-B02-I-39	0.949929	82									DUS3-pS22-C04-I-05	0.856961	82
															DUS3-pS22-B02-I-05	0.938922	83									DUS3-pS22-C01-I-16	0.850602	83
															DUS3-pS22-B01-I-11	0.93294	84									DUS3-pS22-C04-I-04	0.827366	84
															DUS3-pS22-B01-I-05	0.931658	85									DUS3-pS22-C03-I-01	0.802274	85
															DUS3-pS22-B02-I-01	0.92021	86									DUS3-pS22-C01-I-15	0.796707	86
															DUS3-pS22-B01-I-06	0.836518	87									DUS3-pS22-C04-I-06	0.793218	87
															DUS3-pS22-B03-I-13	0.804547	88									DUS3-pS22-C04-I-07	0.788502	88
															DUS3-pS22-B02-I-15	0.796102	89									DUS3-pS22-C03-I-19	0.777297	89
															DUS3-pS22-B01-I-07	0.741121	90									DUS3-pS22-C03-I-23	0.753152	90
															DUS3-pS22-B02-I-04	0.740516	91									DUS3-pS22-C01-I-21	0.727005	91
																										DUS3-pS22-C01-I-03	0.68212	92
																										DUS3-pS22-C01-I-06	0.633058	93
																										DUS3-pS22-C01-I-11	0.606847	94
																										DUS3-pS22-C04-I-22	0.589791	95
																										DUS3-pS22-C03-I-02	0.570983	96
																										DUS3-pS22-C01-I-02	0.551233	97
																										DUS3-pS22-C03-I-26	0.507374	98

## Sheet: VZV
VZV-pS22-A											VZV-pS22-B											VZV-pS22-C
Uninfected				Infected							Uninfected				Infected
#	pS22	n=		#	pS22	n=					#	pS22	n=		#	pS22	n=					#	pS22	n=		#	pS22	n=
VZV-pS22-A02-U-12	2.00994	1		VZV-pS22-A03-I-34	3.51946	1		Uninfected (VZV-pS22-A)			VZV-pS22-B01-U-06	1.72198	1		VZV-pS22-B03-I-25	2.9222	1		Uninfected (VZV-pS22-B)			VZV-pS22-C04-U-09	1.70488	1		VZV-pS22-C01-I-13	2.53436	1		Uninfected (VZV-pS22-C)
VZV-pS22-A02-U-11	1.52364	2		VZV-pS22-A03-I-33	3.4592	2		Mean	1		VZV-pS22-B05-U-07	1.67735	2		VZV-pS22-B03-I-24	2.7076	2		Mean	1		VZV-pS22-C03-U-11	1.46999	2		VZV-pS22-C02-I-10	2.32939	2		Mean	1
VZV-pS22-A04-U-12	1.44443	3		VZV-pS22-A01-I-15	2.97306	3		SD	0.288226		VZV-pS22-B04-U-12	1.63012	3		VZV-pS22-B01-I-21	2.66908	3		SD	0.305113		VZV-pS22-C03-U-10	1.41872	3		VZV-pS22-C04-I-16	2.32576	3		SD	0.210655
VZV-pS22-A01-U-15	1.38423	4		VZV-pS22-A05-I-21	2.55489	4		n=	51		VZV-pS22-B03-U-13	1.61311	4		VZV-pS22-B05-I-11	2.56019	4		n=	48		VZV-pS22-C01-U-18	1.36942	4		VZV-pS22-C04-I-15	2.05407	4		n=	56
VZV-pS22-A05-U-07	1.34701	5		VZV-pS22-A03-I-32	2.41444	5		Increased	0.176471		VZV-pS22-B01-U-05	1.53269	5		VZV-pS22-B05-I-10	2.52227	5		Increased	0.145833		VZV-pS22-C02-U-18	1.35369	5		VZV-pS22-C01-I-12	2.0478	5		Increased	0.125
VZV-pS22-A04-U-11	1.33533	6		VZV-pS22-A01-I-14	2.40739	6					VZV-pS22-B05-U-12	1.44317	6		VZV-pS22-B05-I-09	2.51939	6					VZV-pS22-C01-U-17	1.31293	6		VZV-pS22-C04-I-14	1.995	6
VZV-pS22-A02-U-10	1.31743	7		VZV-pS22-A01-I-13	2.39508	7					VZV-pS22-B04-U-11	1.33155	7		VZV-pS22-B04-I-17	2.48485	7					VZV-pS22-C01-U-16	1.30814	7		VZV-pS22-C04-I-13	1.95487	7
VZV-pS22-A04-U-10	1.30854	8		VZV-pS22-A03-I-31	2.3656	8		Infected (VZV-pS22-A)			VZV-pS22-B03-U-12	1.29653	8		VZV-pS22-B05-I-21	2.41633	8		Infected (VZV-pS22-B)			VZV-pS22-C02-U-17	1.16754	8		VZV-pS22-C03-I-11	1.93151	8		Infected (VZV-pS22-C)
VZV-pS22-A03-U-01	1.29916	9		VZV-pS22-A03-I-30	2.28679	9		mean	1.50449		VZV-pS22-B03-U-11	1.26967	9		VZV-pS22-B02-I-14	2.26335	9		mean	1.40973		VZV-pS22-C02-U-16	1.16727	9		VZV-pS22-C04-I-12	1.91147	9		mean	1.32118
VZV-pS22-A04-U-09	1.26798	10		VZV-pS22-A02-I-12	2.28313	10		SD	0.591039		VZV-pS22-B02-U-05	1.26772	10		VZV-pS22-B05-I-08	2.24019	10		SD	0.566406		VZV-pS22-C01-U-15	1.14786	10		VZV-pS22-C04-I-11	1.88882	10		SD	0.503191
VZV-pS22-A01-U-14	1.24531	11		VZV-pS22-A04-I-17	2.26959	11		n=	99		VZV-pS22-B04-U-10	1.19773	11		VZV-pS22-B05-I-07	2.22149	11		n=	98		VZV-pS22-C01-U-14	1.13623	11		VZV-pS22-C02-I-09	1.84449	11		n=	50
VZV-pS22-A01-U-13	1.23388	12		VZV-pS22-A04-I-16	2.17027	12		Increased	0.59596		VZV-pS22-B04-U-09	1.17156	12		VZV-pS22-B02-I-13	2.16984	12		Increased	0.479592		VZV-pS22-C03-U-09	1.12601	12		VZV-pS22-C04-I-10	1.7773	12		Increased	0.52
VZV-pS22-A03-U-02	1.22532	13		VZV-pS22-A01-I-12	2.12559	13					VZV-pS22-B02-U-04	1.16344	13		VZV-pS22-B03-I-23	2.08017	13					VZV-pS22-C03-U-08	1.1236	13		VZV-pS22-C04-I-09	1.68369	13
VZV-pS22-A01-U-12	1.21259	14		VZV-pS22-A05-I-20	2.12411	14					VZV-pS22-B03-U-10	1.12441	14		VZV-pS22-B03-I-22	2.0724	14					VZV-pS22-C02-U-15	1.11541	14		VZV-pS22-C02-I-08	1.59329	14
VZV-pS22-A02-U-09	1.20864	15		VZV-pS22-A01-I-11	2.1236	15					VZV-pS22-B03-U-09	1.11247	15		VZV-pS22-B01-I-20	2.06559	15					VZV-pS22-C02-U-14	1.10311	15		VZV-pS22-C04-I-08	1.53076	15
VZV-pS22-A05-U-06	1.15304	16		VZV-pS22-A01-I-10	2.11058	16					VZV-pS22-B05-U-11	1.08654	16		VZV-pS22-B03-I-21	2.04982	16					VZV-pS22-C04-U-08	1.1001	16		VZV-pS22-C04-I-07	1.44921	16
VZV-pS22-A02-U-08	1.12214	17		VZV-pS22-A01-I-09	2.08254	17					VZV-pS22-B05-U-06	1.06663	17		VZV-pS22-B04-I-16	2.03824	17					VZV-pS22-C01-U-13	1.09906	17		VZV-pS22-C04-I-06	1.43698	17
VZV-pS22-A01-U-11	1.08614	18		VZV-pS22-A02-I-11	2.07624	18					VZV-pS22-B01-U-04	1.04609	18		VZV-pS22-B02-I-12	2.01452	18					VZV-pS22-C02-U-13	1.09525	18		VZV-pS22-C04-I-05	1.42389	18
VZV-pS22-A01-U-10	1.08352	19		VZV-pS22-A04-I-15	2.04778	19					VZV-pS22-B05-U-05	1.01515	19		VZV-pS22-B02-I-11	1.97946	19					VZV-pS22-C01-U-12	1.07148	19		VZV-pS22-C03-I-10	1.3601	19
VZV-pS22-A04-U-08	1.04409	20		VZV-pS22-A04-I-14	2.01351	20					VZV-pS22-B05-U-04	1.00283	20		VZV-pS22-B01-I-19	1.89493	20					VZV-pS22-C04-U-07	1.06428	20		VZV-pS22-C04-I-04	1.35939	20
VZV-pS22-A01-U-09	1.03349	21		VZV-pS22-A01-I-08	1.99604	21					VZV-pS22-B04-U-08	0.964701	21		VZV-pS22-B03-I-20	1.88976	21					VZV-pS22-C02-U-12	1.05522	21		VZV-pS22-C01-I-11	1.31922	21
VZV-pS22-A04-U-07	1.03114	22		VZV-pS22-A03-I-29	1.99353	22					VZV-pS22-B05-U-03	0.954448	22		VZV-pS22-B03-I-19	1.85693	22					VZV-pS22-C01-U-11	1.03929	22		VZV-pS22-C04-I-03	1.29343	22
VZV-pS22-A04-U-06	1.02626	23		VZV-pS22-A05-I-19	1.93756	23					VZV-pS22-B02-U-03	0.942041	23		VZV-pS22-B02-I-10	1.85104	23					VZV-pS22-C02-U-11	1.02463	23		VZV-pS22-C02-I-07	1.2919	23
VZV-pS22-A05-U-05	1.02237	24		VZV-pS22-A05-I-18	1.93178	24					VZV-pS22-B04-U-07	0.926161	24		VZV-pS22-B02-I-09	1.79356	24					VZV-pS22-C04-U-06	1.02449	24		VZV-pS22-C01-I-10	1.28647	24
VZV-pS22-A01-U-08	0.958905	25		VZV-pS22-A04-I-13	1.92366	25					VZV-pS22-B04-U-06	0.917596	25		VZV-pS22-B05-I-20	1.78746	25					VZV-pS22-C02-U-10	1.02102	25		VZV-pS22-C02-I-06	1.2864	25
VZV-pS22-A05-U-04	0.94339	26		VZV-pS22-A04-I-12	1.8176	26					VZV-pS22-B03-U-08	0.898181	26		VZV-pS22-B01-I-18	1.77285	26					VZV-pS22-C02-U-09	1.01066	26		VZV-pS22-C02-I-05	1.23372	26
VZV-pS22-A01-U-07	0.917922	27		VZV-pS22-A05-I-17	1.81087	27					VZV-pS22-B04-U-05	0.897196	27		VZV-pS22-B01-I-17	1.76385	27					VZV-pS22-C01-U-10	0.9934	27		VZV-pS22-C03-I-09	1.20877	27
VZV-pS22-A01-U-06	0.913235	28		VZV-pS22-A04-I-11	1.79998	28					VZV-pS22-B03-U-07	0.893829	28		VZV-pS22-B05-I-06	1.70821	28					VZV-pS22-C02-U-08	0.946575	28		VZV-pS22-C01-I-09	1.19685	28
VZV-pS22-A05-U-03	0.90626	29		VZV-pS22-A01-I-07	1.79414	29					VZV-pS22-B03-U-06	0.86995	29		VZV-pS22-B02-I-08	1.70641	29					VZV-pS22-C02-U-07	0.932325	29		VZV-pS22-C01-I-08	1.1626	29
VZV-pS22-A03-U-03	0.859374	30		VZV-pS22-A02-I-10	1.77885	30					VZV-pS22-B02-U-02	0.84472	30		VZV-pS22-B03-I-17	1.69102	30					VZV-pS22-C03-U-07	0.927341	30		VZV-pS22-C02-I-04	1.14912	30
VZV-pS22-A01-U-05	0.84072	31		VZV-pS22-A05-I-16	1.74051	31					VZV-pS22-B03-U-05	0.843833	31		VZV-pS22-B03-I-16	1.65116	31					VZV-pS22-C04-U-05	0.923397	31		VZV-pS22-C04-I-02	1.13928	31
VZV-pS22-A02-U-07	0.83052	32		VZV-pS22-A05-I-15	1.73219	32					VZV-pS22-B05-U-10	0.83288	32		VZV-pS22-B03-I-15	1.60005	32					VZV-pS22-C02-U-06	0.920787	32		VZV-pS22-C04-I-01	1.12938	32
VZV-pS22-A05-U-02	0.820825	33		VZV-pS22-A02-I-09	1.72931	33					VZV-pS22-B03-U-04	0.822442	33		VZV-pS22-B01-I-16	1.59412	33					VZV-pS22-C04-U-04	0.911427	33		VZV-pS22-C03-I-08	1.11242	33
VZV-pS22-A01-U-04	0.819752	34		VZV-pS22-A05-I-14	1.70886	34					VZV-pS22-B04-U-04	0.81952	34		VZV-pS22-B01-I-15	1.57685	34					VZV-pS22-C03-U-06	0.885571	34		VZV-pS22-C01-I-07	1.06303	34
VZV-pS22-A03-U-05	0.810419	35		VZV-pS22-A05-I-13	1.69288	35					VZV-pS22-B05-U-09	0.819108	35		VZV-pS22-B05-I-05	1.56392	35					VZV-pS22-C02-U-05	0.885198	35		VZV-pS22-C01-I-06	0.994057	35
VZV-pS22-A01-U-03	0.807202	36		VZV-pS22-A05-I-12	1.63685	36					VZV-pS22-B05-U-08	0.818307	36		VZV-pS22-B02-I-07	1.55631	36					VZV-pS22-C01-U-09	0.885107	36		VZV-pS22-C02-I-03	0.982163	36
VZV-pS22-A05-U-01	0.807098	37		VZV-pS22-A05-I-11	1.60249	37					VZV-pS22-B03-U-03	0.804222	37		VZV-pS22-B03-I-18	1.55469	37					VZV-pS22-C01-U-08	0.885014	37		VZV-pS22-C01-I-05	0.964215	37
VZV-pS22-A03-U-04	0.80573	38		VZV-pS22-A05-I-10	1.60234	38					VZV-pS22-B02-U-01	0.782082	38		VZV-pS22-B02-I-06	1.52216	38					VZV-pS22-C03-U-05	0.883682	38		VZV-pS22-C01-I-04	0.952485	38
VZV-pS22-A01-U-02	0.801087	39		VZV-pS22-A03-I-28	1.5958	39					VZV-pS22-B04-U-03	0.781515	39		VZV-pS22-B03-I-14	1.49633	39					VZV-pS22-C03-U-04	0.883419	39		VZV-pS22-C01-I-03	0.936157	39
VZV-pS22-A04-U-05	0.788084	40		VZV-pS22-A03-I-27	1.59524	40					VZV-pS22-B01-U-03	0.75407	40		VZV-pS22-B05-I-19	1.48865	40					VZV-pS22-C02-U-04	0.881027	40		VZV-pS22-C02-I-02	0.925652	40
VZV-pS22-A04-U-04	0.778462	41		VZV-pS22-A04-I-10	1.58734	41					VZV-pS22-B05-U-02	0.738725	41		VZV-pS22-B05-I-04	1.48824	41					VZV-pS22-C01-U-07	0.869999	41		VZV-pS22-C03-I-07	0.917213	41
VZV-pS22-A02-U-06	0.747149	42		VZV-pS22-A05-I-09	1.54091	42					VZV-pS22-B03-U-02	0.727922	42		VZV-pS22-B05-I-03	1.42947	42					VZV-pS22-C01-U-06	0.868498	42		VZV-pS22-C01-I-02	0.880791	42
VZV-pS22-A04-U-03	0.731687	43		VZV-pS22-A03-I-26	1.50196	43					VZV-pS22-B03-U-01	0.723445	43		VZV-pS22-B04-I-15	1.41464	43					VZV-pS22-C01-U-05	0.859677	43		VZV-pS22-C01-I-01	0.859958	43
VZV-pS22-A02-U-05	0.727258	44		VZV-pS22-A03-I-25	1.50044	44					VZV-pS22-B04-U-02	0.723228	44		VZV-pS22-B02-I-05	1.40323	44					VZV-pS22-C01-U-04	0.849823	44		VZV-pS22-C02-I-01	0.765851	44
VZV-pS22-A01-U-01	0.662012	45		VZV-pS22-A03-I-24	1.4775	45					VZV-pS22-B04-U-01	0.639129	45		VZV-pS22-B05-I-18	1.39176	45					VZV-pS22-C03-U-03	0.837713	45		VZV-pS22-C03-I-06	0.741579	45
VZV-pS22-A02-U-04	0.643887	46		VZV-pS22-A01-I-06	1.47342	46					VZV-pS22-B05-U-01	0.544874	46		VZV-pS22-B04-I-14	1.36141	46					VZV-pS22-C01-U-03	0.824955	46		VZV-pS22-C03-I-05	0.729615	46
VZV-pS22-A02-U-03	0.642597	47		VZV-pS22-A04-I-09	1.47307	47					VZV-pS22-B01-U-02	0.522237	47		VZV-pS22-B05-I-17	1.33347	47					VZV-pS22-C02-U-03	0.818747	47		VZV-pS22-C03-I-04	0.608974	47
VZV-pS22-A04-U-02	0.630216	48		VZV-pS22-A03-I-23	1.46791	48					VZV-pS22-B01-U-01	0.422939	48		VZV-pS22-B01-I-14	1.29488	48					VZV-pS22-C02-U-02	0.810615	48		VZV-pS22-C03-I-03	0.546319	48
VZV-pS22-A02-U-02	0.613866	49		VZV-pS22-A03-I-22	1.46743	49									VZV-pS22-B04-I-13	1.28201	49					VZV-pS22-C04-U-03	0.775884	49		VZV-pS22-C03-I-02	0.50161	49
VZV-pS22-A04-U-01	0.613785	50		VZV-pS22-A03-I-21	1.39741	50									VZV-pS22-B03-I-13	1.26015	50					VZV-pS22-C04-U-02	0.765637	50		VZV-pS22-C03-I-01	0.447771	50
VZV-pS22-A02-U-01	0.612945	51		VZV-pS22-A03-I-20	1.38494	51									VZV-pS22-B03-I-12	1.25729	51					VZV-pS22-C03-U-02	0.764196	51
				VZV-pS22-A03-I-19	1.38126	52									VZV-pS22-B01-I-13	1.23412	52					VZV-pS22-C01-U-02	0.759079	52
				VZV-pS22-A05-I-08	1.38062	53									VZV-pS22-B05-I-02	1.222	53					VZV-pS22-C04-U-01	0.7299	53
				VZV-pS22-A01-I-05	1.37359	54									VZV-pS22-B03-I-11	1.19573	54					VZV-pS22-C01-U-01	0.720041	54
				VZV-pS22-A03-I-18	1.3688	55									VZV-pS22-B03-I-10	1.16949	55					VZV-pS22-C02-U-01	0.69092	55
				VZV-pS22-A04-I-08	1.36316	56									VZV-pS22-B04-I-12	1.15627	56					VZV-pS22-C03-U-01	0.679763	56
				VZV-pS22-A03-I-17	1.36176	57									VZV-pS22-B03-I-09	1.14754	57
				VZV-pS22-A03-I-16	1.35729	58									VZV-pS22-B04-I-11	1.13439	58
				VZV-pS22-A02-I-08	1.32172	59									VZV-pS22-B01-I-12	1.12291	59
				VZV-pS22-A05-I-07	1.27681	60									VZV-pS22-B05-I-01	1.12078	60
				VZV-pS22-A03-I-15	1.26017	61									VZV-pS22-B04-I-10	1.10191	61
				VZV-pS22-A05-I-06	1.2504	62									VZV-pS22-B01-I-11	1.07724	62
				VZV-pS22-A05-I-05	1.2306	63									VZV-pS22-B05-I-16	1.06876	63
				VZV-pS22-A05-I-04	1.22805	64									VZV-pS22-B03-I-08	1.05513	64
				VZV-pS22-A02-I-07	1.2133	65									VZV-pS22-B02-I-04	1.05454	65
				VZV-pS22-A05-I-03	1.21297	66									VZV-pS22-B02-I-03	1.04452	66
				VZV-pS22-A03-I-14	1.20102	67									VZV-pS22-B01-I-10	1.03625	67
				VZV-pS22-A03-I-13	1.16585	68									VZV-pS22-B01-I-09	1.03553	68
				VZV-pS22-A05-I-02	1.15146	69									VZV-pS22-B04-I-09	1.02317	69
				VZV-pS22-A05-I-01	1.11374	70									VZV-pS22-B03-I-07	1.01527	70
				VZV-pS22-A03-I-12	1.0888	71									VZV-pS22-B03-I-06	0.998857	71
				VZV-pS22-A01-I-04	1.04262	72									VZV-pS22-B01-I-08	0.989389	72
				VZV-pS22-A02-I-06	1.02839	73									VZV-pS22-B03-I-05	0.986607	73
				VZV-pS22-A02-I-05	1.02348	74									VZV-pS22-B01-I-07	0.975085	74
				VZV-pS22-A04-I-07	1.02248	75									VZV-pS22-B03-I-04	0.972988	75
				VZV-pS22-A04-I-06	0.99295	76									VZV-pS22-B05-I-15	0.965714	76
				VZV-pS22-A04-I-05	0.938625	77									VZV-pS22-B02-I-02	0.917524	77
				VZV-pS22-A03-I-11	0.914475	78									VZV-pS22-B04-I-08	0.909329	78
				VZV-pS22-A03-I-10	0.914235	79									VZV-pS22-B02-I-01	0.898388	79
				VZV-pS22-A01-I-03	0.91395	80									VZV-pS22-B04-I-07	0.896898	80
				VZV-pS22-A02-I-04	0.892527	81									VZV-pS22-B03-I-03	0.88618	81
				VZV-pS22-A04-I-04	0.889333	82									VZV-pS22-B05-I-14	0.862906	82
				VZV-pS22-A03-I-09	0.877708	83									VZV-pS22-B04-I-06	0.850329	83
				VZV-pS22-A03-I-08	0.86316	84									VZV-pS22-B04-I-05	0.848425	84
				VZV-pS22-A01-I-02	0.845565	85									VZV-pS22-B03-I-02	0.844703	85
				VZV-pS22-A03-I-07	0.843977	86									VZV-pS22-B01-I-06	0.839948	86
				VZV-pS22-A03-I-06	0.837823	87									VZV-pS22-B04-I-04	0.825527	87
				VZV-pS22-A03-I-05	0.82911	88									VZV-pS22-B04-I-03	0.807387	88
				VZV-pS22-A04-I-03	0.823536	89									VZV-pS22-B05-I-13	0.785238	89
				VZV-pS22-A02-I-03	0.817873	90									VZV-pS22-B03-I-01	0.722761	90
				VZV-pS22-A02-I-02	0.809217	91									VZV-pS22-B05-I-12	0.71726	91
				VZV-pS22-A04-I-02	0.805773	92									VZV-pS22-B04-I-02	0.704731	92
				VZV-pS22-A03-I-04	0.800735	93									VZV-pS22-B01-I-05	0.667204	93
				VZV-pS22-A02-I-01	0.788159	94									VZV-pS22-B01-I-04	0.655033	94
				VZV-pS22-A04-I-01	0.781497	95									VZV-pS22-B01-I-03	0.623979	95
				VZV-pS22-A01-I-01	0.775591	96									VZV-pS22-B01-I-02	0.606346	96
				VZV-pS22-A03-I-03	0.762369	97									VZV-pS22-B01-I-01	0.578778	97
				VZV-pS22-A03-I-02	0.707218	98									VZV-pS22-B04-I-01	0.56639	98
				VZV-pS22-A03-I-01	0.604828	99

## Sheet: HCMV AD
HCMV AD-pS22-A											HCMV AD-pS22-B											HCMV AD-pS22-C											HCMV AD-pS22-D
Uninfected				Infected							Uninfected				Infected
#	pS22	n=		#	pS22	n=					#	pS22	n=		#	pS22	n=					#	pS22	n=		#	pS22	n=					#	pS22	n=		#	pS22	n=
HCMV-pS22-A02-U-27	1.84368	1		HCMV-pS22-A01-I-34	3.41873	1		Uninfected (HCMV-pS22-A)			HCMV-pS22-B04-U-20	1.35288	1		HCMV-pS22-B04-I-19	3.30845	1		Uninfected (HCMV-pS22-B)			HCMV-pS22-C03-U-16	1.82325	1		HCMV-pS22-C04-I-23	3.61572	1		Uninfected (HCMV-pS22-C)			HCMV-pS22-D03-U-25	2.64506	1		HCMV-pS22-D02-I-26	5.61438	1		Uninfected (HCMV-pS22-D)
HCMV-pS22-A04-U-18	1.75365	2		HCMV-pS22-A03-I-37	3.353	2		Mean	1		HCMV-pS22-B03-U-17	1.34561	2		HCMV-pS22-B01-I-39	3.16164	2		Mean	1		HCMV-pS22-C05-U-10	1.60679	2		HCMV-pS22-C01-I-31	3.57441	2		Mean	1		HCMV-pS22-D04-U-17	2.33947	2		HCMV-pS22-D02-I-25	4.48197	2		Mean	1
HCMV-pS22-A04-U-17	1.74672	3		HCMV-pS22-A03-I-36	3.17454	3		SD	0.276271		HCMV-pS22-B04-U-19	1.332	3		HCMV-pS22-B01-I-38	2.94729	3		SD	0.143835		HCMV-pS22-C05-U-09	1.4954	3		HCMV-pS22-C01-I-30	3.52592	3		SD	0.248051		HCMV-pS22-D02-U-18	1.8308	3		HCMV-pS22-D02-I-24	4.48153	3		SD	0.310817
HCMV-pS22-A04-U-16	1.62563	4		HCMV-pS22-A03-I-35	3.07207	4		n=	76		HCMV-pS22-B02-U-05	1.30688	4		HCMV-pS22-B02-I-23	2.88718	4		n=	62		HCMV-pS22-C01-U-10	1.48642	4		HCMV-pS22-C04-I-22	3.33407	4		n=	67		HCMV-pS22-D02-U-17	1.63841	4		HCMV-pS22-D03-I-23	4.41085	4		n=	101
HCMV-pS22-A05-U-07	1.5932	5		HCMV-pS22-A01-I-33	3.01794	5		Increased	0.144737		HCMV-pS22-B04-U-18	1.26924	5		HCMV-pS22-B03-I-24	2.69671	5		Increased	0.16129		HCMV-pS22-C04-U-22	1.42517	5		HCMV-pS22-C05-I-24	3.274	5		Increased	0.149254		HCMV-pS22-D05-U-18	1.59806	5		HCMV-pS22-D03-I-22	4.10786	5		Increased	0.108911
HCMV-pS22-A02-U-26	1.38335	6		HCMV-pS22-A03-I-34	2.82058	6					HCMV-pS22-B05-U-08	1.23276	6		HCMV-pS22-B03-I-23	2.61562	6					HCMV-pS22-C04-U-21	1.36553	6		HCMV-pS22-C04-I-21	3.1818	6					HCMV-pS22-D01-U-23	1.55845	6		HCMV-pS22-D01-I-13	4.10623	6
HCMV-pS22-A02-U-25	1.37207	7		HCMV-pS22-A04-I-25	2.64503	7					HCMV-pS22-B01-U-11	1.19764	7		HCMV-pS22-B03-I-22	2.57296	7					HCMV-pS22-C03-U-15	1.35344	7		HCMV-pS22-C02-I-33	3.11184	7					HCMV-pS22-D05-U-17	1.49311	7		HCMV-pS22-D04-I-29	3.92323	7
HCMV-pS22-A02-U-24	1.33874	8		HCMV-pS22-A01-I-32	2.64163	8		Infected (HCMV-pS22-A)			HCMV-pS22-B05-U-07	1.19138	8		HCMV-pS22-B01-I-37	2.42482	8		Infected (HCMV-pS22-B)			HCMV-pS22-C05-U-08	1.35342	8		HCMV-pS22-C04-I-20	3.077	8		Infected (HCMV-pS22-C)			HCMV-pS22-D03-U-24	1.48791	8		HCMV-pS22-D01-I-12	3.92223	8		Infected (HCMV-pS22-D)
HCMV-pS22-A02-U-23	1.31725	9		HCMV-pS22-A03-I-33	2.52447	9		mean	1.68484		HCMV-pS22-B01-U-10	1.17861	9		HCMV-pS22-B02-I-22	2.41453	9		mean	1.67568		HCMV-pS22-C01-U-09	1.30536	9		HCMV-pS22-C02-I-32	3.00913	9		mean	1.97891		HCMV-pS22-D01-U-22	1.43759	9		HCMV-pS22-D04-I-28	3.75269	9		mean	2.49716
HCMV-pS22-A04-U-15	1.31622	10		HCMV-pS22-A01-I-31	2.50338	10		SD	0.488717		HCMV-pS22-B04-U-17	1.17251	10		HCMV-pS22-B01-I-36	2.37738	10		SD	0.427618		HCMV-pS22-C02-U-09	1.25006	10		HCMV-pS22-C04-I-19	3.00352	10		SD	0.597323		HCMV-pS22-D01-U-21	1.32955	10		HCMV-pS22-D02-I-23	3.71717	10		SD	0.88291
HCMV-pS22-A01-U-09	1.28188	11		HCMV-pS22-A02-I-26	2.36076	11		n=	158		HCMV-pS22-B03-U-16	1.14116	11		HCMV-pS22-B03-I-21	2.33556	11		n=	131		HCMV-pS22-C03-U-14	1.22074	11		HCMV-pS22-C02-I-31	3.00313	11		n=	144		HCMV-pS22-D01-U-20	1.32561	11		HCMV-pS22-D05-I-26	3.59276	11		n=	117
HCMV-pS22-A02-U-22	1.27621	12		HCMV-pS22-A03-I-32	2.33354	12		Increased	0.829114		HCMV-pS22-B05-U-06	1.13415	12		HCMV-pS22-B04-I-18	2.19615	12		Increased	0.931298		HCMV-pS22-C03-U-13	1.21912	12		HCMV-pS22-C04-I-18	2.90641	12		Increased	0.895833		HCMV-pS22-D04-U-16	1.26188	12		HCMV-pS22-D05-I-25	3.54567	12		Increased	0.905983
HCMV-pS22-A02-U-21	1.2645	13		HCMV-pS22-A03-I-31	2.33277	13					HCMV-pS22-B04-U-16	1.08931	13		HCMV-pS22-B04-I-17	2.14379	13					HCMV-pS22-C03-U-12	1.20487	13		HCMV-pS22-C02-I-30	2.86941	13					HCMV-pS22-D02-U-16	1.26134	13		HCMV-pS22-D02-I-22	3.53397	13
HCMV-pS22-A03-U-08	1.24613	14		HCMV-pS22-A02-I-25	2.30708	14					HCMV-pS22-B01-U-09	1.08396	14		HCMV-pS22-B01-I-35	2.13551	14					HCMV-pS22-C01-U-08	1.19337	14		HCMV-pS22-C05-I-23	2.82031	14					HCMV-pS22-D05-U-16	1.24642	14		HCMV-pS22-D03-I-21	3.51722	14
HCMV-pS22-A02-U-20	1.23259	15		HCMV-pS22-A01-I-30	2.29965	15					HCMV-pS22-B03-U-15	1.0763	15		HCMV-pS22-B03-I-20	2.13278	15					HCMV-pS22-C03-U-11	1.18946	15		HCMV-pS22-C02-I-29	2.81352	15					HCMV-pS22-D03-U-23	1.24402	15		HCMV-pS22-D05-I-24	3.47284	15
HCMV-pS22-A03-U-06	1.22344	16		HCMV-pS22-A05-I-36	2.29915	16					HCMV-pS22-B03-U-14	1.07502	16		HCMV-pS22-B01-I-34	2.12265	16					HCMV-pS22-C02-U-08	1.16211	16		HCMV-pS22-C01-I-29	2.77531	16					HCMV-pS22-D01-U-19	1.23845	16		HCMV-pS22-D01-I-11	3.47249	16
HCMV-pS22-A04-U-14	1.21011	17		HCMV-pS22-A03-I-30	2.25985	17					HCMV-pS22-B03-U-13	1.05895	17		HCMV-pS22-B01-I-33	2.09438	17					HCMV-pS22-C03-U-10	1.15297	17		HCMV-pS22-C02-I-28	2.76032	17					HCMV-pS22-D05-U-15	1.15139	17		HCMV-pS22-D02-I-21	3.35632	17
HCMV-pS22-A03-U-10	1.20766	18		HCMV-pS22-A02-I-24	2.24684	18					HCMV-pS22-B04-U-15	1.04968	18		HCMV-pS22-B04-I-16	2.09172	18					HCMV-pS22-C02-U-07	1.14067	18		HCMV-pS22-C02-I-27	2.75713	18					HCMV-pS22-D04-U-15	1.1473	18		HCMV-pS22-D03-I-20	3.34111	18
HCMV-pS22-A03-U-07	1.19655	19		HCMV-pS22-A01-I-29	2.24173	19					HCMV-pS22-B04-U-14	1.044	19		HCMV-pS22-B03-I-19	1.9842	19					HCMV-pS22-C04-U-20	1.12796	19		HCMV-pS22-C05-I-22	2.71022	19					HCMV-pS22-D05-U-14	1.12908	19		HCMV-pS22-D05-I-23	3.32033	19
HCMV-pS22-A01-U-02	1.16366	20		HCMV-pS22-A04-I-24	2.22029	20					HCMV-pS22-B02-U-04	1.04097	20		HCMV-pS22-B01-I-32	1.98228	20					HCMV-pS22-C04-U-19	1.11239	20		HCMV-pS22-C05-I-21	2.68942	20					HCMV-pS22-D02-U-15	1.1247	20		HCMV-pS22-D02-I-20	3.30282	20
HCMV-pS22-A03-U-11	1.12677	21		HCMV-pS22-A01-I-28	2.21139	21					HCMV-pS22-B03-U-12	1.03245	21		HCMV-pS22-B01-I-31	1.94957	21					HCMV-pS22-C04-U-18	1.10201	21		HCMV-pS22-C01-I-28	2.68478	21					HCMV-pS22-D03-U-22	1.12089	21		HCMV-pS22-D01-I-10	3.28405	21
HCMV-pS22-A03-U-13	1.10922	22		HCMV-pS22-A01-I-27	2.2105	22					HCMV-pS22-B04-U-13	1.02793	22		HCMV-pS22-B03-I-18	1.93708	22					HCMV-pS22-C02-U-06	1.09777	22		HCMV-pS22-C03-I-33	2.63073	22					HCMV-pS22-D03-U-21	1.11486	22		HCMV-pS22-D01-I-09	3.27698	22
HCMV-pS22-A01-U-10	1.08311	23		HCMV-pS22-A02-I-23	2.19337	23					HCMV-pS22-B03-U-11	1.02433	23		HCMV-pS22-B04-I-15	1.93652	23					HCMV-pS22-C04-U-17	1.07815	23		HCMV-pS22-C02-I-26	2.62029	23					HCMV-pS22-D02-U-14	1.08941	23		HCMV-pS22-D03-I-19	3.24337	23
HCMV-pS22-A02-U-19	1.04708	24		HCMV-pS22-A01-I-26	2.17142	24					HCMV-pS22-B01-U-08	0.997191	24		HCMV-pS22-B01-I-30	1.92393	24					HCMV-pS22-C02-U-05	1.06075	24		HCMV-pS22-C04-I-17	2.59977	24					HCMV-pS22-D03-U-20	1.08682	24		HCMV-pS22-D03-I-18	3.21432	24
HCMV-pS22-A01-U-08	1.04247	25		HCMV-pS22-A02-I-22	2.15954	25					HCMV-pS22-B05-U-05	0.995635	25		HCMV-pS22-B04-I-14	1.89564	25					HCMV-pS22-C04-U-16	1.04911	25		HCMV-pS22-C02-I-25	2.59136	25					HCMV-pS22-D05-U-13	1.08342	25		HCMV-pS22-D04-I-27	3.18428	25
HCMV-pS22-A01-U-07	1.03312	26		HCMV-pS22-A03-I-29	2.14114	26					HCMV-pS22-B04-U-12	0.982985	26		HCMV-pS22-B01-I-29	1.87454	26					HCMV-pS22-C04-U-15	1.03426	26		HCMV-pS22-C03-I-32	2.58682	26					HCMV-pS22-D03-U-19	1.08335	26		HCMV-pS22-D03-I-17	3.13613	26
HCMV-pS22-A02-U-18	1.02673	27		HCMV-pS22-A03-I-28	2.12111	27					HCMV-pS22-B03-U-10	0.978807	27		HCMV-pS22-B01-I-28	1.86694	27					HCMV-pS22-C04-U-14	1.00491	27		HCMV-pS22-C04-I-16	2.55999	27					HCMV-pS22-D01-U-18	1.0505	27		HCMV-pS22-D02-I-19	3.12768	27
HCMV-pS22-A04-U-13	1.01551	28		HCMV-pS22-A05-I-35	2.12031	28					HCMV-pS22-B04-U-11	0.978694	28		HCMV-pS22-B03-I-17	1.86625	28					HCMV-pS22-C04-U-13	1.00205	28		HCMV-pS22-C01-I-27	2.53463	28					HCMV-pS22-D01-U-17	1.04458	28		HCMV-pS22-D02-I-18	3.12222	28
HCMV-pS22-A04-U-12	0.996536	29		HCMV-pS22-A02-I-21	2.1095	29					HCMV-pS22-B03-U-09	0.978568	29		HCMV-pS22-B04-I-13	1.86612	29					HCMV-pS22-C01-U-07	0.999202	29		HCMV-pS22-C04-I-15	2.50929	29					HCMV-pS22-D03-U-18	1.04297	29		HCMV-pS22-D05-I-22	3.12025	29
HCMV-pS22-A03-U-04	0.993041	30		HCMV-pS22-A02-I-20	2.08587	30					HCMV-pS22-B01-U-07	0.974334	30		HCMV-pS22-B02-I-21	1.86432	30					HCMV-pS22-C01-U-06	0.988801	30		HCMV-pS22-C01-I-26	2.50775	30					HCMV-pS22-D04-U-14	1.03531	30		HCMV-pS22-D05-I-21	3.09461	30
HCMV-pS22-A05-U-06	0.99217	31		HCMV-pS22-A05-I-34	2.085	31					HCMV-pS22-B01-U-06	0.972229	31		HCMV-pS22-B05-I-26	1.86202	31					HCMV-pS22-C04-U-12	0.96793	31		HCMV-pS22-C05-I-20	2.48905	31					HCMV-pS22-D01-U-16	1.03455	31		HCMV-pS22-D04-I-26	3.04948	31
HCMV-pS22-A05-U-05	0.978775	32		HCMV-pS22-A01-I-25	2.06336	32					HCMV-pS22-B02-U-03	0.968599	32		HCMV-pS22-B02-I-20	1.86193	32					HCMV-pS22-C04-U-11	0.947829	32		HCMV-pS22-C02-I-24	2.46739	32					HCMV-pS22-D04-U-13	1.02961	32		HCMV-pS22-D01-I-08	3.048	32
HCMV-pS22-A02-U-17	0.976553	33		HCMV-pS22-A05-I-33	2.04554	33					HCMV-pS22-B04-U-10	0.967131	33		HCMV-pS22-B04-I-12	1.85542	33					HCMV-pS22-C04-U-10	0.944608	33		HCMV-pS22-C01-I-25	2.46102	33					HCMV-pS22-D04-U-12	1.00704	33		HCMV-pS22-D03-I-16	3.03218	33
HCMV-pS22-A05-U-04	0.975468	34		HCMV-pS22-A05-I-32	2.03607	34					HCMV-pS22-B03-U-08	0.956683	34		HCMV-pS22-B02-I-19	1.85328	34					HCMV-pS22-C04-U-09	0.943356	34		HCMV-pS22-C04-I-14	2.39298	34					HCMV-pS22-D02-U-13	0.995251	34		HCMV-pS22-D03-I-15	3.03054	34
HCMV-pS22-A03-U-12	0.964263	35		HCMV-pS22-A03-I-27	2.02248	35					HCMV-pS22-B03-U-07	0.956603	35		HCMV-pS22-B03-I-16	1.84874	35					HCMV-pS22-C05-U-07	0.927714	35		HCMV-pS22-C01-I-24	2.38191	35					HCMV-pS22-D01-U-15	0.991635	35		HCMV-pS22-D03-I-14	2.99966	35
HCMV-pS22-A01-U-05	0.95896	36		HCMV-pS22-A01-I-24	2.02034	36					HCMV-pS22-B01-U-05	0.950951	36		HCMV-pS22-B01-I-27	1.82852	36					HCMV-pS22-C04-U-08	0.924209	36		HCMV-pS22-C02-I-23	2.37516	36					HCMV-pS22-D05-U-12	0.991342	36		HCMV-pS22-D01-I-07	2.97918	36
HCMV-pS22-A02-U-16	0.949072	37		HCMV-pS22-A01-I-23	1.98808	37					HCMV-pS22-B05-U-04	0.950414	37		HCMV-pS22-B04-I-11	1.82597	37					HCMV-pS22-C02-U-04	0.922375	37		HCMV-pS22-C04-I-13	2.35714	37					HCMV-pS22-D03-U-17	0.989992	37		HCMV-pS22-D05-I-20	2.93256	37
HCMV-pS22-A01-U-06	0.945313	38		HCMV-pS22-A03-I-26	1.96729	38					HCMV-pS22-B03-U-06	0.949441	38		HCMV-pS22-B03-I-15	1.82519	38					HCMV-pS22-C04-U-07	0.905421	38		HCMV-pS22-C01-I-23	2.33987	38					HCMV-pS22-D05-U-11	0.989817	38		HCMV-pS22-D04-I-25	2.92038	38
HCMV-pS22-A01-U-01	0.942569	39		HCMV-pS22-A03-I-25	1.96321	39					HCMV-pS22-B02-U-02	0.939735	39		HCMV-pS22-B02-I-18	1.82297	39					HCMV-pS22-C04-U-06	0.887408	39		HCMV-pS22-C04-I-12	2.33865	39					HCMV-pS22-D05-U-10	0.981714	39		HCMV-pS22-D01-I-06	2.90757	39
HCMV-pS22-A02-U-15	0.941077	40		HCMV-pS22-A01-I-22	1.96212	40					HCMV-pS22-B01-U-04	0.934862	40		HCMV-pS22-B01-I-26	1.82123	40					HCMV-pS22-C04-U-05	0.878819	40		HCMV-pS22-C01-I-22	2.31987	40					HCMV-pS22-D05-U-09	0.97447	40		HCMV-pS22-D02-I-17	2.90269	40
HCMV-pS22-A02-U-14	0.914309	41		HCMV-pS22-A02-I-19	1.94875	41					HCMV-pS22-B04-U-09	0.934622	41		HCMV-pS22-B02-I-17	1.82116	41					HCMV-pS22-C01-U-05	0.876151	41		HCMV-pS22-C02-I-22	2.28305	41					HCMV-pS22-D02-U-12	0.964385	41		HCMV-pS22-D05-I-19	2.87994	41
HCMV-pS22-A04-U-11	0.909285	42		HCMV-pS22-A03-I-24	1.9443	42					HCMV-pS22-B03-U-05	0.932171	42		HCMV-pS22-B01-I-25	1.81266	42					HCMV-pS22-C04-U-04	0.855796	42		HCMV-pS22-C01-I-21	2.2719	42					HCMV-pS22-D01-U-14	0.958172	42		HCMV-pS22-D05-I-18	2.86631	42
HCMV-pS22-A05-U-03	0.906701	43		HCMV-pS22-A02-I-18	1.92605	43					HCMV-pS22-B01-U-03	0.917945	43		HCMV-pS22-B01-I-24	1.80732	43					HCMV-pS22-C03-U-09	0.855736	43		HCMV-pS22-C03-I-31	2.26987	43					HCMV-pS22-D02-U-11	0.953547	43		HCMV-pS22-D04-I-24	2.838	43
HCMV-pS22-A04-U-10	0.90081	44		HCMV-pS22-A01-I-21	1.91866	44					HCMV-pS22-B02-U-01	0.916932	44		HCMV-pS22-B01-I-23	1.80176	44					HCMV-pS22-C01-U-04	0.848757	44		HCMV-pS22-C03-I-30	2.2393	44					HCMV-pS22-D01-U-13	0.953486	44		HCMV-pS22-D05-I-17	2.82113	44
HCMV-pS22-A02-U-13	0.899034	45		HCMV-pS22-A01-I-20	1.90857	45					HCMV-pS22-B03-U-04	0.910922	45		HCMV-pS22-B03-I-14	1.78555	45					HCMV-pS22-C02-U-03	0.840561	45		HCMV-pS22-C01-I-20	2.21828	45					HCMV-pS22-D01-U-12	0.940495	45		HCMV-pS22-D05-I-16	2.8198	45
HCMV-pS22-A02-U-12	0.891967	46		HCMV-pS22-A05-I-31	1.90083	46					HCMV-pS22-B04-U-08	0.909676	46		HCMV-pS22-B01-I-22	1.76198	46					HCMV-pS22-C01-U-03	0.834475	46		HCMV-pS22-C04-I-11	2.21083	46					HCMV-pS22-D03-U-16	0.93482	46		HCMV-pS22-D03-I-13	2.77706	46
HCMV-pS22-A04-U-09	0.878265	47		HCMV-pS22-A03-I-23	1.87694	47					HCMV-pS22-B03-U-03	0.902645	47		HCMV-pS22-B01-I-21	1.75935	47					HCMV-pS22-C04-U-03	0.833787	47		HCMV-pS22-C01-I-19	2.20964	47					HCMV-pS22-D01-U-11	0.93326	47		HCMV-pS22-D04-I-23	2.66168	47
HCMV-pS22-A01-U-11	0.878193	48		HCMV-pS22-A03-I-22	1.8637	48					HCMV-pS22-B04-U-07	0.901676	48		HCMV-pS22-B01-I-20	1.75845	48					HCMV-pS22-C03-U-08	0.831682	48		HCMV-pS22-C05-I-19	2.19158	48					HCMV-pS22-D02-U-10	0.927103	48		HCMV-pS22-D04-I-22	2.66159	48
HCMV-pS22-A04-U-08	0.859557	49		HCMV-pS22-A01-I-19	1.83107	49					HCMV-pS22-B01-U-02	0.896291	49		HCMV-pS22-B01-I-19	1.74491	49					HCMV-pS22-C03-U-07	0.829863	49		HCMV-pS22-C04-I-10	2.17396	49					HCMV-pS22-D03-U-15	0.926599	49		HCMV-pS22-D03-I-12	2.64013	49
HCMV-pS22-A01-U-04	0.841111	50		HCMV-pS22-A01-I-18	1.8089	50					HCMV-pS22-B01-U-01	0.895991	50		HCMV-pS22-B02-I-16	1.73717	50					HCMV-pS22-C03-U-06	0.82865	50		HCMV-pS22-C01-I-18	2.17294	50					HCMV-pS22-D04-U-11	0.923408	50		HCMV-pS22-D01-I-05	2.61117	50
HCMV-pS22-A04-U-07	0.840316	51		HCMV-pS22-A02-I-17	1.78972	51					HCMV-pS22-B05-U-03	0.88705	51		HCMV-pS22-B02-I-15	1.72151	51					HCMV-pS22-C01-U-02	0.825466	51		HCMV-pS22-C01-I-17	2.13142	51					HCMV-pS22-D02-U-09	0.917566	51		HCMV-pS22-D04-I-21	2.50557	51
HCMV-pS22-A01-U-03	0.829615	52		HCMV-pS22-A03-I-21	1.78741	52					HCMV-pS22-B04-U-06	0.88633	52		HCMV-pS22-B02-I-14	1.71776	52					HCMV-pS22-C04-U-02	0.818517	52		HCMV-pS22-C02-I-21	2.09969	52					HCMV-pS22-D02-U-08	0.916959	52		HCMV-pS22-D01-I-04	2.49286	52
HCMV-pS22-A03-U-01	0.816651	53		HCMV-pS22-A02-I-16	1.78686	53					HCMV-pS22-B04-U-05	0.87433	53		HCMV-pS22-B03-I-13	1.70748	53					HCMV-pS22-C05-U-06	0.812831	53		HCMV-pS22-C01-I-16	2.08447	53					HCMV-pS22-D03-U-14	0.911071	53		HCMV-pS22-D03-I-11	2.48649	53
HCMV-pS22-A02-U-11	0.815376	54		HCMV-pS22-A03-I-20	1.77554	54					HCMV-pS22-B03-U-02	0.868583	54		HCMV-pS22-B02-I-13	1.70253	54					HCMV-pS22-C02-U-02	0.805201	54		HCMV-pS22-C04-I-09	2.07102	54					HCMV-pS22-D05-U-08	0.907554	54		HCMV-pS22-D04-I-20	2.48233	54
HCMV-pS22-A05-U-02	0.80991	55		HCMV-pS22-A05-I-30	1.77288	55					HCMV-pS22-B04-U-04	0.848585	55		HCMV-pS22-B01-I-18	1.69657	55					HCMV-pS22-C03-U-05	0.799391	55		HCMV-pS22-C01-I-15	2.06249	55					HCMV-pS22-D02-U-07	0.903347	55		HCMV-pS22-D05-I-15	2.47673	55
HCMV-pS22-A02-U-10	0.808881	56		HCMV-pS22-A02-I-15	1.76887	56					HCMV-pS22-B05-U-02	0.846378	56		HCMV-pS22-B03-I-12	1.69459	56					HCMV-pS22-C05-U-05	0.79464	56		HCMV-pS22-C01-I-14	2.05583	56					HCMV-pS22-D01-U-10	0.89026	56		HCMV-pS22-D05-I-14	2.47464	56
HCMV-pS22-A03-U-09	0.807906	57		HCMV-pS22-A01-I-17	1.75883	57					HCMV-pS22-B04-U-03	0.841385	57		HCMV-pS22-B01-I-17	1.68958	57					HCMV-pS22-C04-U-01	0.790782	57		HCMV-pS22-C02-I-20	2.05422	57					HCMV-pS22-D04-U-10	0.887757	57		HCMV-pS22-D03-I-10	2.45699	57
HCMV-pS22-A02-U-09	0.807739	58		HCMV-pS22-A04-I-23	1.75871	58					HCMV-pS22-B04-U-02	0.839712	58		HCMV-pS22-B02-I-12	1.68305	58					HCMV-pS22-C05-U-04	0.780462	58		HCMV-pS22-C01-I-13	2.03788	58					HCMV-pS22-D01-U-09	0.882203	58		HCMV-pS22-D04-I-19	2.45339	58
HCMV-pS22-A02-U-08	0.805312	59		HCMV-pS22-A03-I-19	1.75686	59					HCMV-pS22-B01-U-12	0.826877	59		HCMV-pS22-B01-I-16	1.67401	59					HCMV-pS22-C05-U-03	0.779002	59		HCMV-pS22-C02-I-19	2.0343	59					HCMV-pS22-D04-U-09	0.881969	59		HCMV-pS22-D02-I-16	2.45167	59
HCMV-pS22-A03-U-05	0.804656	60		HCMV-pS22-A04-I-22	1.74283	60					HCMV-pS22-B03-U-01	0.81176	60		HCMV-pS22-B03-I-11	1.66856	60					HCMV-pS22-C05-U-02	0.76717	60		HCMV-pS22-C03-I-29	2.00891	60					HCMV-pS22-D04-U-08	0.880543	60		HCMV-pS22-D04-I-18	2.3737	60
HCMV-pS22-A02-U-07	0.78197	61		HCMV-pS22-A05-I-29	1.73735	61					HCMV-pS22-B05-U-01	0.762239	61		HCMV-pS22-B02-I-11	1.66479	61					HCMV-pS22-C03-U-04	0.748049	61		HCMV-pS22-C02-I-18	2.00623	61					HCMV-pS22-D01-U-08	0.872254	61		HCMV-pS22-D05-I-13	2.34195	61
HCMV-pS22-A02-U-06	0.773904	62		HCMV-pS22-A02-I-14	1.71755	62					HCMV-pS22-B04-U-01	0.697312	62		HCMV-pS22-B05-I-25	1.65548	62					HCMV-pS22-C02-U-01	0.720507	62		HCMV-pS22-C02-I-17	2.00445	62					HCMV-pS22-D05-U-07	0.864469	62		HCMV-pS22-D03-I-09	2.32499	62
HCMV-pS22-A04-U-06	0.769214	63		HCMV-pS22-A01-I-16	1.71411	63									HCMV-pS22-B04-I-10	1.6547	63					HCMV-pS22-C05-U-01	0.682572	63		HCMV-pS22-C01-I-12	1.98295	63					HCMV-pS22-D04-U-07	0.860913	63		HCMV-pS22-D04-I-17	2.27178	63
HCMV-pS22-A03-U-03	0.758387	64		HCMV-pS22-A02-I-13	1.70984	64									HCMV-pS22-B03-I-10	1.63816	64					HCMV-pS22-C03-U-03	0.677656	64		HCMV-pS22-C03-I-28	1.95651	64					HCMV-pS22-D03-U-13	0.85873	64		HCMV-pS22-D05-I-12	2.26207	64
HCMV-pS22-A03-U-02	0.745327	65		HCMV-pS22-A04-I-21	1.70861	65									HCMV-pS22-B04-I-09	1.63724	65					HCMV-pS22-C03-U-02	0.648346	65		HCMV-pS22-C03-I-27	1.9559	65					HCMV-pS22-D03-U-12	0.854802	65		HCMV-pS22-D01-I-03	2.24694	65
HCMV-pS22-A05-U-01	0.743777	66		HCMV-pS22-A03-I-18	1.70622	66									HCMV-pS22-B02-I-10	1.62215	66					HCMV-pS22-C01-U-01	0.641988	66		HCMV-pS22-C02-I-16	1.95494	66					HCMV-pS22-D01-U-07	0.850055	66		HCMV-pS22-D04-I-16	2.24628	66
HCMV-pS22-A02-U-05	0.737286	67		HCMV-pS22-A03-I-17	1.70374	67									HCMV-pS22-B02-I-09	1.61695	67					HCMV-pS22-C03-U-01	0.616763	67		HCMV-pS22-C02-I-15	1.93373	67					HCMV-pS22-D04-U-05	0.844975	67		HCMV-pS22-D02-I-15	2.24384	67
HCMV-pS22-A02-U-04	0.724795	68		HCMV-pS22-A03-I-16	1.69488	68									HCMV-pS22-B01-I-15	1.61552	68									HCMV-pS22-C05-I-18	1.9309	68					HCMV-pS22-D04-U-06	0.844975	68		HCMV-pS22-D02-I-14	2.2396	68
HCMV-pS22-A04-U-05	0.723803	69		HCMV-pS22-A05-I-28	1.67727	69									HCMV-pS22-B01-I-14	1.61078	69									HCMV-pS22-C02-I-14	1.93018	69					HCMV-pS22-D03-U-11	0.840005	69		HCMV-pS22-D05-I-11	2.22671	69
HCMV-pS22-A02-U-03	0.719941	70		HCMV-pS22-A05-I-27	1.66847	70									HCMV-pS22-B02-I-08	1.60772	70									HCMV-pS22-C03-I-26	1.92609	70					HCMV-pS22-D03-U-10	0.83361	70		HCMV-pS22-D02-I-13	2.20153	70
HCMV-pS22-A04-U-04	0.718207	71		HCMV-pS22-A01-I-15	1.6642	71									HCMV-pS22-B04-I-08	1.60742	71									HCMV-pS22-C03-I-25	1.92215	71					HCMV-pS22-D04-U-04	0.831973	71		HCMV-pS22-D04-I-15	2.17758	71
HCMV-pS22-A02-U-02	0.677755	72		HCMV-pS22-A05-I-26	1.6609	72									HCMV-pS22-B02-I-07	1.60721	72									HCMV-pS22-C03-I-24	1.92119	72					HCMV-pS22-D05-U-06	0.827389	72		HCMV-pS22-D02-I-12	2.17578	72
HCMV-pS22-A02-U-01	0.67283	73		HCMV-pS22-A01-I-14	1.65916	73									HCMV-pS22-B03-I-09	1.60609	73									HCMV-pS22-C03-I-23	1.91209	73					HCMV-pS22-D01-U-06	0.824896	73		HCMV-pS22-D03-I-08	2.17108	73
HCMV-pS22-A04-U-03	0.615233	74		HCMV-pS22-A03-I-15	1.64843	74									HCMV-pS22-B01-I-13	1.59169	74									HCMV-pS22-C03-I-22	1.89683	74					HCMV-pS22-D03-U-09	0.823197	74		HCMV-pS22-D04-I-14	2.16088	74
HCMV-pS22-A04-U-02	0.58821	75		HCMV-pS22-A05-I-25	1.63176	75									HCMV-pS22-B02-I-06	1.58657	75									HCMV-pS22-C01-I-11	1.89073	75					HCMV-pS22-D03-U-08	0.82274	75		HCMV-pS22-D04-I-13	2.15275	75
HCMV-pS22-A04-U-01	0.532726	76		HCMV-pS22-A03-I-14	1.62627	76									HCMV-pS22-B04-I-07	1.57855	76									HCMV-pS22-C02-I-13	1.88495	76					HCMV-pS22-D03-U-07	0.814063	76		HCMV-pS22-D03-I-07	2.13719	76
				HCMV-pS22-A04-I-20	1.6236	77									HCMV-pS22-B05-I-24	1.57809	77									HCMV-pS22-C03-I-21	1.8657	77					HCMV-pS22-D01-U-05	0.811741	77		HCMV-pS22-D02-I-11	2.08327	77
				HCMV-pS22-A05-I-24	1.61562	78									HCMV-pS22-B03-I-08	1.56877	78									HCMV-pS22-C05-I-17	1.86111	78					HCMV-pS22-D05-U-05	0.803082	78		HCMV-pS22-D05-I-10	2.07572	78
				HCMV-pS22-A05-I-23	1.59712	79									HCMV-pS22-B03-I-07	1.56176	79									HCMV-pS22-C03-I-20	1.83791	79					HCMV-pS22-D03-U-06	0.791227	79		HCMV-pS22-D04-I-12	2.0728	79
				HCMV-pS22-A01-I-13	1.59508	80									HCMV-pS22-B02-I-05	1.56146	80									HCMV-pS22-C04-I-08	1.82563	80					HCMV-pS22-D01-U-04	0.783376	80		HCMV-pS22-D02-I-10	2.03125	80
				HCMV-pS22-A01-I-12	1.59448	81									HCMV-pS22-B01-I-12	1.55996	81									HCMV-pS22-C05-I-16	1.80909	81					HCMV-pS22-D03-U-05	0.777525	81		HCMV-pS22-D01-I-02	2.03046	81
				HCMV-pS22-A05-I-22	1.58771	82									HCMV-pS22-B01-I-11	1.55808	82									HCMV-pS22-C05-I-15	1.78829	82					HCMV-pS22-D02-U-06	0.776155	82		HCMV-pS22-D04-I-11	2.01903	82
				HCMV-pS22-A01-I-11	1.56623	83									HCMV-pS22-B05-I-23	1.55051	83									HCMV-pS22-C05-I-14	1.78078	83					HCMV-pS22-D01-U-03	0.77129	83		HCMV-pS22-D03-I-06	1.98711	83
				HCMV-pS22-A02-I-12	1.5558	84									HCMV-pS22-B04-I-06	1.54786	84									HCMV-pS22-C02-I-12	1.77789	84					HCMV-pS22-D03-U-04	0.766289	84		HCMV-pS22-D04-I-10	1.97415	84
				HCMV-pS22-A05-I-21	1.55436	85									HCMV-pS22-B01-I-10	1.53011	85									HCMV-pS22-C03-I-19	1.76746	85					HCMV-pS22-D01-U-02	0.763479	85		HCMV-pS22-D05-I-09	1.95971	85
				HCMV-pS22-A05-I-20	1.55386	86									HCMV-pS22-B01-I-09	1.52635	86									HCMV-pS22-C03-I-18	1.75281	86					HCMV-pS22-D05-U-04	0.761427	86		HCMV-pS22-D04-I-09	1.94916	86
				HCMV-pS22-A01-I-10	1.55302	87									HCMV-pS22-B05-I-22	1.49729	87									HCMV-pS22-C03-I-17	1.74412	87					HCMV-pS22-D02-U-05	0.758641	87		HCMV-pS22-D03-I-05	1.94783	87
				HCMV-pS22-A04-I-19	1.54658	88									HCMV-pS22-B04-I-05	1.49615	88									HCMV-pS22-C05-I-13	1.73559	88					HCMV-pS22-D02-U-04	0.75656	88		HCMV-pS22-D05-I-08	1.90585	88
				HCMV-pS22-A04-I-18	1.54003	89									HCMV-pS22-B04-I-04	1.4811	89									HCMV-pS22-C05-I-12	1.72324	89					HCMV-pS22-D01-U-01	0.754106	89		HCMV-pS22-D02-I-09	1.89816	89
				HCMV-pS22-A05-I-19	1.53917	90									HCMV-pS22-B01-I-08	1.46763	90									HCMV-pS22-C02-I-11	1.68743	90					HCMV-pS22-D03-U-03	0.752222	90		HCMV-pS22-D02-I-08	1.89608	90
				HCMV-pS22-A05-I-18	1.52914	91									HCMV-pS22-B01-I-07	1.46485	91									HCMV-pS22-C03-I-16	1.68555	91					HCMV-pS22-D02-U-03	0.750058	91		HCMV-pS22-D05-I-07	1.87869	91
				HCMV-pS22-A04-I-17	1.52239	92									HCMV-pS22-B05-I-21	1.45212	92									HCMV-pS22-C05-I-11	1.68081	92					HCMV-pS22-D03-U-02	0.74665	92		HCMV-pS22-D04-I-08	1.84682	92
				HCMV-pS22-A05-I-17	1.51894	93									HCMV-pS22-B05-I-20	1.44494	93									HCMV-pS22-C02-I-10	1.67579	93					HCMV-pS22-D05-U-03	0.745603	93		HCMV-pS22-D02-I-07	1.78615	93
				HCMV-pS22-A03-I-13	1.51205	94									HCMV-pS22-B01-I-06	1.44086	94									HCMV-pS22-C01-I-10	1.63892	94					HCMV-pS22-D04-U-03	0.7423	94		HCMV-pS22-D04-I-07	1.78432	94
				HCMV-pS22-A05-I-16	1.50482	95									HCMV-pS22-B02-I-04	1.43829	95									HCMV-pS22-C03-I-15	1.63178	95					HCMV-pS22-D04-U-02	0.742132	95		HCMV-pS22-D05-I-06	1.74829	95
				HCMV-pS22-A03-I-12	1.50082	96									HCMV-pS22-B04-I-03	1.39586	96									HCMV-pS22-C02-I-09	1.62413	96					HCMV-pS22-D04-U-01	0.738441	96		HCMV-pS22-D02-I-06	1.72632	96
				HCMV-pS22-A02-I-11	1.49563	97									HCMV-pS22-B01-I-05	1.39357	97									HCMV-pS22-C01-I-09	1.61497	97					HCMV-pS22-D02-U-02	0.738353	97		HCMV-pS22-D05-I-05	1.70482	97
				HCMV-pS22-A01-I-09	1.49555	98									HCMV-pS22-B05-I-19	1.37593	98									HCMV-pS22-C05-I-10	1.59407	98					HCMV-pS22-D05-U-02	0.73283	98		HCMV-pS22-D04-I-06	1.66076	98
				HCMV-pS22-A03-I-11	1.49272	99									HCMV-pS22-B05-I-18	1.35905	99									HCMV-pS22-C05-I-09	1.59241	99					HCMV-pS22-D03-U-01	0.730574	99		HCMV-pS22-D02-I-05	1.63806	99
				HCMV-pS22-A04-I-16	1.48465	100									HCMV-pS22-B02-I-03	1.35393	100									HCMV-pS22-C04-I-07	1.58669	100					HCMV-pS22-D05-U-01	0.718818	100		HCMV-pS22-D04-I-05	1.54483	100
				HCMV-pS22-A05-I-15	1.44535	101									HCMV-pS22-B05-I-17	1.35357	101									HCMV-pS22-C04-I-06	1.58252	101					HCMV-pS22-D02-U-01	0.69743	101		HCMV-pS22-D04-I-04	1.54315	101
				HCMV-pS22-A05-I-14	1.44406	102									HCMV-pS22-B05-I-16	1.35297	102									HCMV-pS22-C05-I-08	1.58177	102									HCMV-pS22-D04-I-03	1.5252	102
				HCMV-pS22-A02-I-10	1.41961	103									HCMV-pS22-B05-I-15	1.34891	103									HCMV-pS22-C05-I-07	1.57739	103									HCMV-pS22-D01-I-01	1.50936	103
				HCMV-pS22-A05-I-13	1.4147	104									HCMV-pS22-B02-I-02	1.33582	104									HCMV-pS22-C03-I-14	1.57149	104									HCMV-pS22-D02-I-04	1.50454	104
				HCMV-pS22-A05-I-12	1.40988	105									HCMV-pS22-B04-I-02	1.33077	105									HCMV-pS22-C02-I-08	1.5675	105									HCMV-pS22-D05-I-04	1.48034	105
				HCMV-pS22-A01-I-08	1.40848	106									HCMV-pS22-B03-I-06	1.32022	106									HCMV-pS22-C03-I-13	1.56063	106									HCMV-pS22-D02-I-03	1.435	106
				HCMV-pS22-A01-I-07	1.40395	107									HCMV-pS22-B05-I-14	1.3089	107									HCMV-pS22-C04-I-05	1.55812	107									HCMV-pS22-D03-I-04	1.29947	107
				HCMV-pS22-A03-I-10	1.40089	108									HCMV-pS22-B05-I-13	1.30451	108									HCMV-pS22-C03-I-12	1.54921	108									HCMV-pS22-D03-I-03	1.20301	108
				HCMV-pS22-A02-I-09	1.39491	109									HCMV-pS22-B01-I-04	1.30072	109									HCMV-pS22-C02-I-07	1.53962	109									HCMV-pS22-D04-I-02	1.18412	109
				HCMV-pS22-A04-I-15	1.39468	110									HCMV-pS22-B05-I-12	1.29908	110									HCMV-pS22-C02-I-06	1.53049	110									HCMV-pS22-D03-I-02	1.16163	110
				HCMV-pS22-A05-I-11	1.39076	111									HCMV-pS22-B03-I-05	1.28131	111									HCMV-pS22-C02-I-05	1.5129	111									HCMV-pS22-D03-I-01	1.13176	111
				HCMV-pS22-A03-I-09	1.38612	112									HCMV-pS22-B01-I-03	1.2544	112									HCMV-pS22-C04-I-04	1.49204	112									HCMV-pS22-D05-I-03	1.04949	112
				HCMV-pS22-A05-I-10	1.38594	113									HCMV-pS22-B03-I-04	1.25067	113									HCMV-pS22-C04-I-03	1.47504	113									HCMV-pS22-D04-I-01	0.979359	113
				HCMV-pS22-A03-I-08	1.38429	114									HCMV-pS22-B01-I-02	1.23282	114									HCMV-pS22-C01-I-08	1.45024	114									HCMV-pS22-D02-I-02	0.940368	114
				HCMV-pS22-A01-I-06	1.38066	115									HCMV-pS22-B04-I-01	1.23091	115									HCMV-pS22-C05-I-06	1.445	115									HCMV-pS22-D05-I-02	0.928716	115
				HCMV-pS22-A02-I-08	1.37735	116									HCMV-pS22-B02-I-01	1.22426	116									HCMV-pS22-C02-I-04	1.44469	116									HCMV-pS22-D05-I-01	0.89745	116
				HCMV-pS22-A03-I-07	1.3668	117									HCMV-pS22-B03-I-03	1.21915	117									HCMV-pS22-C01-I-07	1.44021	117									HCMV-pS22-D02-I-01	0.853233	117
				HCMV-pS22-A03-I-06	1.35935	118									HCMV-pS22-B03-I-02	1.2178	118									HCMV-pS22-C03-I-11	1.43258	118
				HCMV-pS22-A02-I-07	1.3488	119									HCMV-pS22-B05-I-11	1.18288	119									HCMV-pS22-C03-I-10	1.41221	119
				HCMV-pS22-A01-I-05	1.34662	120									HCMV-pS22-B05-I-10	1.16331	120									HCMV-pS22-C03-I-09	1.40948	120
				HCMV-pS22-A01-I-04	1.33824	121									HCMV-pS22-B05-I-09	1.15103	121									HCMV-pS22-C05-I-05	1.39517	121
				HCMV-pS22-A05-I-09	1.33696	122									HCMV-pS22-B05-I-08	1.1472	122									HCMV-pS22-C05-I-04	1.36921	122
				HCMV-pS22-A05-I-08	1.33343	123									HCMV-pS22-B05-I-07	1.1387	123									HCMV-pS22-C03-I-08	1.36375	123
				HCMV-pS22-A04-I-14	1.33264	124									HCMV-pS22-B05-I-06	1.12434	124									HCMV-pS22-C05-I-03	1.35915	124
				HCMV-pS22-A02-I-06	1.32589	125									HCMV-pS22-B05-I-05	1.1182	125									HCMV-pS22-C03-I-07	1.32464	125
				HCMV-pS22-A01-I-03	1.32193	126									HCMV-pS22-B03-I-01	1.10471	126									HCMV-pS22-C01-I-06	1.28112	126
				HCMV-pS22-A04-I-13	1.31894	127									HCMV-pS22-B05-I-04	1.0607	127									HCMV-pS22-C05-I-02	1.26246	127
				HCMV-pS22-A02-I-05	1.31711	128									HCMV-pS22-B05-I-03	1.05176	128									HCMV-pS22-C04-I-02	1.25441	128
				HCMV-pS22-A05-I-07	1.30888	129									HCMV-pS22-B01-I-01	1.04689	129									HCMV-pS22-C03-I-06	1.2498	129
				HCMV-pS22-A04-I-12	1.30615	130									HCMV-pS22-B05-I-02	0.952881	130									HCMV-pS22-C01-I-05	1.24611	130
				HCMV-pS22-A04-I-11	1.29618	131									HCMV-pS22-B05-I-01	0.84128	131									HCMV-pS22-C03-I-05	1.24186	131
				HCMV-pS22-A05-I-06	1.26937	132																				HCMV-pS22-C02-I-03	1.22266	132
				HCMV-pS22-A02-I-04	1.25558	133																				HCMV-pS22-C02-I-02	1.19043	133
				HCMV-pS22-A02-I-03	1.23566	134																				HCMV-pS22-C03-I-04	1.18653	134
				HCMV-pS22-A01-I-02	1.23337	135																				HCMV-pS22-C03-I-03	1.18324	135
				HCMV-pS22-A04-I-10	1.22268	136																				HCMV-pS22-C04-I-01	1.17031	136
				HCMV-pS22-A03-I-05	1.22049	137																				HCMV-pS22-C03-I-02	1.165	137
				HCMV-pS22-A05-I-05	1.19774	138																				HCMV-pS22-C03-I-01	1.15752	138
				HCMV-pS22-A02-I-02	1.19462	139																				HCMV-pS22-C01-I-04	1.1517	139
				HCMV-pS22-A03-I-04	1.18533	140																				HCMV-pS22-C02-I-01	1.11701	140
				HCMV-pS22-A04-I-09	1.15851	141																				HCMV-pS22-C01-I-03	1.09156	141
				HCMV-pS22-A05-I-04	1.15717	142																				HCMV-pS22-C05-I-01	1.08299	142
				HCMV-pS22-A02-I-01	1.15222	143																				HCMV-pS22-C01-I-02	1.02725	143
				HCMV-pS22-A05-I-03	1.13856	144																				HCMV-pS22-C01-I-01	1.00147	144
				HCMV-pS22-A03-I-03	1.12866	145
				HCMV-pS22-A05-I-02	1.12752	146
				HCMV-pS22-A01-I-01	1.1222	147
				HCMV-pS22-A04-I-08	1.07995	148
				HCMV-pS22-A04-I-07	1.03422	149
				HCMV-pS22-A04-I-06	1.02137	150
				HCMV-pS22-A05-I-01	1.01801	151
				HCMV-pS22-A04-I-05	0.976388	152
				HCMV-pS22-A04-I-04	0.961038	153
				HCMV-pS22-A03-I-02	0.935603	154
				HCMV-pS22-A04-I-03	0.934762	155
				HCMV-pS22-A03-I-01	0.881652	156
				HCMV-pS22-A04-I-02	0.813879	157
				HCMV-pS22-A04-I-01	0.763565	158

## Sheet: HCMV TB
HCMV TB-pS22-A											HCMV TB-pS22-B											HCMV TB-pS22-C
Uninfected				Infected							Uninfected				Infected
#	pS22	n=		#	pS22	n=					#	pS22	n=		#	pS22	n=					#	pS22	n=		#	pS22	n=
HCMVTB-pS22-A03-U-14	2.80808	1		HCMVTB-pS22-A04-I-10	3.85476	1		Uninfected (HCMV-pS22-A)			HCMVTB-pS22-B05-U-11	2.81874	1		HCMVTB-pS22-B04-I-07	3.58638	1		Uninfected (HCMV-pS22-B)			HCMVTB-pS22-C03-U-15	2.70377	1		HCMVTB-pS22-C04-I-19	4.25642	1		Uninfected (HCMV-pS22-C)
HCMVTB-pS22-A05-U-31	2.18116	2		HCMVTB-pS22-A05-I-10	3.50949	2		Mean	1		HCMVTB-pS22-B05-U-21	1.97243	2		HCMVTB-pS22-B04-I-06	3.5859	2		Mean	1		HCMVTB-pS22-C05-U-06	1.66409	2		HCMVTB-pS22-C04-I-18	3.94337	2		Mean	1
HCMVTB-pS22-A03-U-16	1.95869	3		HCMVTB-pS22-A02-I-19	3.46887	3		SD	0.339401		HCMVTB-pS22-B01-U-19	1.87905	3		HCMVTB-pS22-B03-I-22	3.52556	3		SD	0.277276		HCMVTB-pS22-C03-U-16	1.51537	3		HCMVTB-pS22-C02-I-21	3.71148	3		SD	0.258706
HCMVTB-pS22-A05-U-37	1.78055	4		HCMVTB-pS22-A05-I-12	3.31777	4		n=	122		HCMVTB-pS22-B03-U-12	1.60716	4		HCMVTB-pS22-B03-I-04	3.38028	4		n=	129		HCMVTB-pS22-C05-U-09	1.43554	4		HCMVTB-pS22-C04-I-16	3.53077	4		n=	107
HCMVTB-pS22-A01-U-09	1.75945	5		HCMVTB-pS22-A04-I-06	3.27724	5		Increased	0.106557		HCMVTB-pS22-B01-U-07	1.56433	5		HCMVTB-pS22-B03-I-14	3.3191	5		Increased	0.100775		HCMVTB-pS22-C04-U-09	1.42381	5		HCMVTB-pS22-C02-I-02	3.51707	5		Increased	0.0934579
HCMVTB-pS22-A05-U-06	1.73061	6		HCMVTB-pS22-A05-I-07	3.21936	6					HCMVTB-pS22-B02-U-17	1.49505	6		HCMVTB-pS22-B05-I-10	3.2735	6					HCMVTB-pS22-C02-U-08	1.40768	6		HCMVTB-pS22-C04-I-14	3.47528	6
HCMVTB-pS22-A04-U-02	1.69255	7		HCMVTB-pS22-A02-I-18	3.15259	7					HCMVTB-pS22-B04-U-20	1.47825	7		HCMVTB-pS22-B04-I-18	3.24809	7					HCMVTB-pS22-C02-U-09	1.37271	7		HCMVTB-pS22-C02-I-06	3.4532	7
HCMVTB-pS22-A03-U-20	1.64229	8		HCMVTB-pS22-A05-I-04	3.14634	8		Infected (HCMV-pS22-A)			HCMVTB-pS22-B02-U-08	1.42922	8		HCMVTB-pS22-B04-I-01	3.21771	8		Infected (HCMV-pS22-B)			HCMVTB-pS22-C05-U-22	1.36144	8		HCMVTB-pS22-C02-I-15	3.36411	8		Infected (HCMV-pS22-C)
HCMVTB-pS22-A05-U-23	1.61146	9		HCMVTB-pS22-A05-I-03	3.10866	9		mean	2.19697		HCMVTB-pS22-B02-U-30	1.39693	9		HCMVTB-pS22-B03-I-07	3.18659	9		mean	2.28649		HCMVTB-pS22-C01-U-07	1.34423	9		HCMVTB-pS22-C03-I-15	3.34184	9		mean	2.13777
HCMVTB-pS22-A02-U-09	1.59197	10		HCMVTB-pS22-A03-I-13	3.10165	10		SD	0.710047		HCMVTB-pS22-B04-U-06	1.38282	10		HCMVTB-pS22-B05-I-08	3.17567	10		SD	0.658329		HCMVTB-pS22-C04-U-14	1.32794	10		HCMVTB-pS22-C02-I-11	3.33555	10		SD	0.863445
HCMVTB-pS22-A03-U-04	1.50548	11		HCMVTB-pS22-A03-I-07	3.03837	11		n=	105		HCMVTB-pS22-B03-U-26	1.34359	11		HCMVTB-pS22-B03-I-06	3.14702	11		n=	109		HCMVTB-pS22-C02-U-02	1.24747	11		HCMVTB-pS22-C02-I-10	3.30142	11		n=	117
HCMVTB-pS22-A01-U-22	1.38653	12		HCMVTB-pS22-A02-I-23	3.0018	12		Increased	0.857143		HCMVTB-pS22-B03-U-16	1.31372	12		HCMVTB-pS22-B03-I-03	3.1231	12		Increased	0.908257		HCMVTB-pS22-C03-U-03	1.22309	12		HCMVTB-pS22-C01-I-14	3.26403	12		Increased	0.777778
HCMVTB-pS22-A01-U-07	1.34933	13		HCMVTB-pS22-A04-I-01	2.99474	13					HCMVTB-pS22-B04-U-15	1.3078	13		HCMVTB-pS22-B02-I-13	3.07902	13					HCMVTB-pS22-C01-U-06	1.21286	13		HCMVTB-pS22-C04-I-20	3.26055	13
HCMVTB-pS22-A05-U-21	1.2734	14		HCMVTB-pS22-A05-I-11	2.97309	14					HCMVTB-pS22-B03-U-09	1.26954	14		HCMVTB-pS22-B01-I-10	3.07092	14					HCMVTB-pS22-C02-U-14	1.20581	14		HCMVTB-pS22-C03-I-13	3.22931	14
HCMVTB-pS22-A03-U-12	1.26633	15		HCMVTB-pS22-A02-I-06	2.97265	15					HCMVTB-pS22-B02-U-24	1.26056	15		HCMVTB-pS22-B02-I-17	3.05646	15					HCMVTB-pS22-C03-U-13	1.20522	15		HCMVTB-pS22-C02-I-01	3.1908	15
HCMVTB-pS22-A04-U-07	1.25764	16		HCMVTB-pS22-A02-I-29	2.9718	16					HCMVTB-pS22-B03-U-24	1.24861	16		HCMVTB-pS22-B03-I-13	2.96974	16					HCMVTB-pS22-C02-U-07	1.20164	16		HCMVTB-pS22-C03-I-09	3.17929	16
HCMVTB-pS22-A05-U-33	1.25067	17		HCMVTB-pS22-A04-I-09	2.96556	17					HCMVTB-pS22-B03-U-10	1.21926	17		HCMVTB-pS22-B05-I-06	2.94025	17					HCMVTB-pS22-C03-U-19	1.19582	17		HCMVTB-pS22-C02-I-07	3.17624	17
HCMVTB-pS22-A01-U-04	1.24405	18		HCMVTB-pS22-A04-I-07	2.96389	18					HCMVTB-pS22-B03-U-31	1.21405	18		HCMVTB-pS22-B04-I-15	2.93045	18					HCMVTB-pS22-C05-U-08	1.18014	18		HCMVTB-pS22-C05-I-15	3.15133	18
HCMVTB-pS22-A04-U-24	1.2252	19		HCMVTB-pS22-A02-I-13	2.96267	19					HCMVTB-pS22-B03-U-13	1.17456	19		HCMVTB-pS22-B03-I-18	2.91499	19					HCMVTB-pS22-C04-U-11	1.17325	19		HCMVTB-pS22-C01-I-21	3.10942	19
HCMVTB-pS22-A05-U-01	1.21091	20		HCMVTB-pS22-A02-I-08	2.95963	20					HCMVTB-pS22-B02-U-06	1.16577	20		HCMVTB-pS22-B01-I-18	2.90262	20					HCMVTB-pS22-C04-U-22	1.16823	20		HCMVTB-pS22-C01-I-24	3.09199	20
HCMVTB-pS22-A05-U-25	1.18952	21		HCMVTB-pS22-A04-I-15	2.94253	21					HCMVTB-pS22-B02-U-16	1.15163	21		HCMVTB-pS22-B05-I-05	2.89157	21					HCMVTB-pS22-C03-U-07	1.1594	21		HCMVTB-pS22-C03-I-03	3.0798	21
HCMVTB-pS22-A04-U-23	1.18142	22		HCMVTB-pS22-A01-I-13	2.9169	22					HCMVTB-pS22-B04-U-11	1.13595	22		HCMVTB-pS22-B04-I-21	2.87548	22					HCMVTB-pS22-C03-U-05	1.15123	22		HCMVTB-pS22-C03-I-16	3.01317	22
HCMVTB-pS22-A05-U-36	1.17806	23		HCMVTB-pS22-A02-I-30	2.87069	23					HCMVTB-pS22-B01-U-17	1.13481	23		HCMVTB-pS22-B03-I-10	2.85513	23					HCMVTB-pS22-C01-U-16	1.14206	23		HCMVTB-pS22-C02-I-22	2.97786	23
HCMVTB-pS22-A01-U-08	1.16991	24		HCMVTB-pS22-A04-I-19	2.85317	24					HCMVTB-pS22-B03-U-05	1.12756	24		HCMVTB-pS22-B04-I-22	2.82337	24					HCMVTB-pS22-C05-U-07	1.13324	24		HCMVTB-pS22-C01-I-26	2.94741	24
HCMVTB-pS22-A01-U-15	1.16772	25		HCMVTB-pS22-A05-I-05	2.76776	25					HCMVTB-pS22-B02-U-23	1.12443	25		HCMVTB-pS22-B04-I-12	2.82084	25					HCMVTB-pS22-C05-U-20	1.1229	25		HCMVTB-pS22-C02-I-23	2.90911	25
HCMVTB-pS22-A04-U-06	1.13378	26		HCMVTB-pS22-A04-I-17	2.7458	26					HCMVTB-pS22-B04-U-10	1.12252	26		HCMVTB-pS22-B02-I-01	2.81842	26					HCMVTB-pS22-C04-U-20	1.12011	26		HCMVTB-pS22-C04-I-17	2.89868	26
HCMVTB-pS22-A04-U-16	1.12677	27		HCMVTB-pS22-A02-I-27	2.71099	27					HCMVTB-pS22-B01-U-08	1.12212	27		HCMVTB-pS22-B03-I-09	2.80772	27					HCMVTB-pS22-C04-U-12	1.1148	27		HCMVTB-pS22-C03-I-14	2.87807	27
HCMVTB-pS22-A05-U-22	1.12309	28		HCMVTB-pS22-A03-I-14	2.66658	28					HCMVTB-pS22-B01-U-06	1.11979	28		HCMVTB-pS22-B05-I-04	2.80637	28					HCMVTB-pS22-C04-U-25	1.11323	28		HCMVTB-pS22-C04-I-06	2.87158	28
HCMVTB-pS22-A01-U-18	1.10359	29		HCMVTB-pS22-A02-I-17	2.6517	29					HCMVTB-pS22-B03-U-14	1.11273	29		HCMVTB-pS22-B01-I-08	2.78981	29					HCMVTB-pS22-C01-U-08	1.09479	29		HCMVTB-pS22-C05-I-02	2.8492	29
HCMVTB-pS22-A04-U-08	1.09598	30		HCMVTB-pS22-A04-I-05	2.64711	30					HCMVTB-pS22-B03-U-11	1.10498	30		HCMVTB-pS22-B02-I-03	2.74904	30					HCMVTB-pS22-C01-U-10	1.09101	30		HCMVTB-pS22-C01-I-16	2.77509	30
HCMVTB-pS22-A01-U-17	1.09593	31		HCMVTB-pS22-A02-I-14	2.63769	31					HCMVTB-pS22-B01-U-16	1.09716	31		HCMVTB-pS22-B03-I-01	2.74852	31					HCMVTB-pS22-C04-U-13	1.08591	31		HCMVTB-pS22-C05-I-22	2.72515	31
HCMVTB-pS22-A04-U-09	1.09314	32		HCMVTB-pS22-A01-I-04	2.63681	32					HCMVTB-pS22-B02-U-15	1.08727	32		HCMVTB-pS22-B02-I-12	2.67658	32					HCMVTB-pS22-C04-U-16	1.05186	32		HCMVTB-pS22-C03-I-08	2.72231	32
HCMVTB-pS22-A05-U-19	1.08909	33		HCMVTB-pS22-A02-I-20	2.61094	33					HCMVTB-pS22-B04-U-01	1.08193	33		HCMVTB-pS22-B02-I-16	2.67179	33					HCMVTB-pS22-C05-U-23	1.05012	33		HCMVTB-pS22-C03-I-10	2.70276	33
HCMVTB-pS22-A05-U-15	1.08437	34		HCMVTB-pS22-A01-I-12	2.60542	34					HCMVTB-pS22-B02-U-31	1.08063	34		HCMVTB-pS22-B03-I-21	2.66013	34					HCMVTB-pS22-C01-U-03	1.04838	34		HCMVTB-pS22-C02-I-05	2.67758	34
HCMVTB-pS22-A01-U-03	1.07506	35		HCMVTB-pS22-A01-I-09	2.59145	35					HCMVTB-pS22-B05-U-02	1.075	35		HCMVTB-pS22-B05-I-14	2.60526	35					HCMVTB-pS22-C04-U-06	1.0428	35		HCMVTB-pS22-C01-I-07	2.65491	35
HCMVTB-pS22-A02-U-04	1.0661	36		HCMVTB-pS22-A04-I-18	2.50969	36					HCMVTB-pS22-B02-U-05	1.0746	36		HCMVTB-pS22-B05-I-07	2.59035	36					HCMVTB-pS22-C02-U-11	1.03293	36		HCMVTB-pS22-C04-I-15	2.64084	36
HCMVTB-pS22-A03-U-06	1.05736	37		HCMVTB-pS22-A02-I-03	2.49978	37					HCMVTB-pS22-B04-U-09	1.06669	37		HCMVTB-pS22-B04-I-09	2.58563	37					HCMVTB-pS22-C05-U-10	1.01661	37		HCMVTB-pS22-C04-I-11	2.63038	37
HCMVTB-pS22-A02-U-06	1.05166	38		HCMVTB-pS22-A02-I-25	2.49419	38					HCMVTB-pS22-B02-U-07	1.05969	38		HCMVTB-pS22-B01-I-20	2.57295	38					HCMVTB-pS22-C05-U-03	1.00849	38		HCMVTB-pS22-C01-I-04	2.61591	38
HCMVTB-pS22-A05-U-24	1.04812	39		HCMVTB-pS22-A02-I-34	2.48082	39					HCMVTB-pS22-B05-U-18	1.05542	39		HCMVTB-pS22-B04-I-20	2.5703	39					HCMVTB-pS22-C01-U-17	1.00677	39		HCMVTB-pS22-C05-I-17	2.61285	39
HCMVTB-pS22-A04-U-21	1.04779	40		HCMVTB-pS22-A05-I-06	2.47385	40					HCMVTB-pS22-B03-U-06	1.04226	40		HCMVTB-pS22-B02-I-25	2.56409	40					HCMVTB-pS22-C01-U-11	1.00605	40		HCMVTB-pS22-C01-I-27	2.60458	40
HCMVTB-pS22-A05-U-14	1.04697	41		HCMVTB-pS22-A01-I-11	2.46706	41					HCMVTB-pS22-B01-U-20	1.0379	41		HCMVTB-pS22-B03-I-15	2.55475	41					HCMVTB-pS22-C02-U-13	1.0027	41		HCMVTB-pS22-C04-I-12	2.59004	41
HCMVTB-pS22-A04-U-11	1.03629	42		HCMVTB-pS22-A02-I-26	2.45994	42					HCMVTB-pS22-B03-U-01	1.03226	42		HCMVTB-pS22-B02-I-23	2.52762	42					HCMVTB-pS22-C01-U-18	0.999657	42		HCMVTB-pS22-C04-I-13	2.55084	42
HCMVTB-pS22-A05-U-27	1.02891	43		HCMVTB-pS22-A04-I-14	2.45604	43					HCMVTB-pS22-B04-U-14	1.02911	43		HCMVTB-pS22-B02-I-10	2.52414	43					HCMVTB-pS22-C05-U-15	0.999122	43		HCMVTB-pS22-C01-I-29	2.52521	43
HCMVTB-pS22-A01-U-25	1.02153	44		HCMVTB-pS22-A01-I-01	2.42212	44					HCMVTB-pS22-B02-U-28	1.02006	44		HCMVTB-pS22-B02-I-14	2.51835	44					HCMVTB-pS22-C01-U-13	0.997987	44		HCMVTB-pS22-C02-I-03	2.49355	44
HCMVTB-pS22-A02-U-12	1.0206	45		HCMVTB-pS22-A04-I-04	2.41339	45					HCMVTB-pS22-B04-U-22	1.01885	45		HCMVTB-pS22-B02-I-06	2.51	45					HCMVTB-pS22-C01-U-02	0.994937	45		HCMVTB-pS22-C01-I-09	2.46211	45
HCMVTB-pS22-A02-U-05	1.01629	46		HCMVTB-pS22-A02-I-07	2.37864	46					HCMVTB-pS22-B03-U-30	1.00457	46		HCMVTB-pS22-B04-I-10	2.50729	46					HCMVTB-pS22-C04-U-24	0.98256	46		HCMVTB-pS22-C05-I-26	2.42325	46
HCMVTB-pS22-A02-U-07	1.00461	47		HCMVTB-pS22-A04-I-16	2.36995	47					HCMVTB-pS22-B03-U-33	1.00017	47		HCMVTB-pS22-B02-I-21	2.50537	47					HCMVTB-pS22-C04-U-08	0.980764	47		HCMVTB-pS22-C04-I-07	2.41928	47
HCMVTB-pS22-A02-U-10	1.00348	48		HCMVTB-pS22-A03-I-04	2.33372	48					HCMVTB-pS22-B03-U-21	0.989368	48		HCMVTB-pS22-B03-I-11	2.48722	48					HCMVTB-pS22-C01-U-01	0.97395	48		HCMVTB-pS22-C01-I-06	2.38811	48
HCMVTB-pS22-A05-U-08	1.00055	49		HCMVTB-pS22-A02-I-01	2.33138	49					HCMVTB-pS22-B02-U-11	0.989307	49		HCMVTB-pS22-B03-I-20	2.48417	49					HCMVTB-pS22-C05-U-04	0.972409	49		HCMVTB-pS22-C04-I-09	2.37979	49
HCMVTB-pS22-A04-U-14	0.995184	50		HCMVTB-pS22-A01-I-16	2.3298	50					HCMVTB-pS22-B04-U-19	0.987577	50		HCMVTB-pS22-B02-I-19	2.47338	50					HCMVTB-pS22-C04-U-02	0.970286	50		HCMVTB-pS22-C01-I-15	2.3619	50
HCMVTB-pS22-A02-U-01	0.993643	51		HCMVTB-pS22-A02-I-15	2.31935	51					HCMVTB-pS22-B04-U-17	0.985094	51		HCMVTB-pS22-B02-I-24	2.41791	51					HCMVTB-pS22-C05-U-24	0.962002	51		HCMVTB-pS22-C03-I-12	2.3616	51
HCMVTB-pS22-A03-U-02	0.991635	52		HCMVTB-pS22-A02-I-02	2.31652	52					HCMVTB-pS22-B04-U-03	0.981873	52		HCMVTB-pS22-B03-I-23	2.36263	52					HCMVTB-pS22-C02-U-06	0.960417	52		HCMVTB-pS22-C01-I-17	2.36073	52
HCMVTB-pS22-A04-U-12	0.987861	53		HCMVTB-pS22-A03-I-09	2.30937	53					HCMVTB-pS22-B02-U-18	0.974782	53		HCMVTB-pS22-B02-I-04	2.35726	53					HCMVTB-pS22-C05-U-13	0.959435	53		HCMVTB-pS22-C03-I-07	2.32311	53
HCMVTB-pS22-A04-U-20	0.980301	54		HCMVTB-pS22-A04-I-03	2.30044	54					HCMVTB-pS22-B04-U-07	0.974358	54		HCMVTB-pS22-B02-I-11	2.34351	54					HCMVTB-pS22-C04-U-03	0.95689	54		HCMVTB-pS22-C02-I-20	2.31021	54
HCMVTB-pS22-A05-U-09	0.977759	55		HCMVTB-pS22-A04-I-13	2.26425	55					HCMVTB-pS22-B04-U-02	0.968721	55		HCMVTB-pS22-B02-I-09	2.34189	55					HCMVTB-pS22-C05-U-26	0.956382	55		HCMVTB-pS22-C05-I-21	2.30937	55
HCMVTB-pS22-A02-U-03	0.972769	56		HCMVTB-pS22-A02-I-24	2.25906	56					HCMVTB-pS22-B04-U-08	0.965903	56		HCMVTB-pS22-B01-I-13	2.32133	56					HCMVTB-pS22-C01-U-15	0.955578	56		HCMVTB-pS22-C05-I-10	2.30666	56
HCMVTB-pS22-A01-U-01	0.955382	57		HCMVTB-pS22-A01-I-08	2.25624	57					HCMVTB-pS22-B05-U-06	0.964642	57		HCMVTB-pS22-B04-I-13	2.30286	57					HCMVTB-pS22-C05-U-01	0.95541	57		HCMVTB-pS22-C03-I-11	2.29436	57
HCMVTB-pS22-A04-U-05	0.949197	58		HCMVTB-pS22-A01-I-15	2.21147	58					HCMVTB-pS22-B02-U-01	0.959021	58		HCMVTB-pS22-B05-I-09	2.3026	58					HCMVTB-pS22-C04-U-10	0.951651	58		HCMVTB-pS22-C03-I-02	2.2783	58
HCMVTB-pS22-A01-U-11	0.944778	59		HCMVTB-pS22-A03-I-11	2.15293	59					HCMVTB-pS22-B03-U-07	0.95659	59		HCMVTB-pS22-B03-I-08	2.3012	59					HCMVTB-pS22-C02-U-03	0.934783	59		HCMVTB-pS22-C02-I-17	2.25553	59
HCMVTB-pS22-A04-U-03	0.93707	60		HCMVTB-pS22-A02-I-12	2.12915	60					HCMVTB-pS22-B03-U-25	0.952419	60		HCMVTB-pS22-B04-I-14	2.27357	60					HCMVTB-pS22-C01-U-12	0.932413	60		HCMVTB-pS22-C04-I-01	2.23799	60
HCMVTB-pS22-A04-U-15	0.935101	61		HCMVTB-pS22-A03-I-08	2.1105	61					HCMVTB-pS22-B01-U-14	0.950395	61		HCMVTB-pS22-B01-I-09	2.26283	61					HCMVTB-pS22-C04-U-04	0.932193	61		HCMVTB-pS22-C05-I-06	2.23229	61
HCMVTB-pS22-A05-U-17	0.923153	62		HCMVTB-pS22-A02-I-04	2.10694	62					HCMVTB-pS22-B01-U-15	0.944017	62		HCMVTB-pS22-B05-I-11	2.23267	62					HCMVTB-pS22-C04-U-07	0.925009	62		HCMVTB-pS22-C04-I-03	2.2037	62
HCMVTB-pS22-A04-U-04	0.917856	63		HCMVTB-pS22-A01-I-03	2.08119	63					HCMVTB-pS22-B02-U-09	0.943646	63		HCMVTB-pS22-B01-I-05	2.2247	63					HCMVTB-pS22-C02-U-10	0.919668	63		HCMVTB-pS22-C01-I-10	2.16968	63
HCMVTB-pS22-A04-U-18	0.912344	64		HCMVTB-pS22-A05-I-08	2.0715	64					HCMVTB-pS22-B04-U-16	0.942751	64		HCMVTB-pS22-B04-I-08	2.20347	64					HCMVTB-pS22-C05-U-18	0.913919	64		HCMVTB-pS22-C04-I-08	2.09826	64
HCMVTB-pS22-A03-U-03	0.910352	65		HCMVTB-pS22-A03-I-19	2.06967	65					HCMVTB-pS22-B05-U-14	0.940965	65		HCMVTB-pS22-B02-I-05	2.17107	65					HCMVTB-pS22-C04-U-05	0.912061	65		HCMVTB-pS22-C02-I-19	2.09692	65
HCMVTB-pS22-A01-U-16	0.901436	66		HCMVTB-pS22-A04-I-02	2.06026	66					HCMVTB-pS22-B05-U-15	0.938048	66		HCMVTB-pS22-B03-I-16	2.15031	66					HCMVTB-pS22-C02-U-04	0.910891	66		HCMVTB-pS22-C05-I-19	2.06691	66
HCMVTB-pS22-A01-U-19	0.887634	67		HCMVTB-pS22-A01-I-05	2.0009	67					HCMVTB-pS22-B05-U-05	0.937094	67		HCMVTB-pS22-B05-I-13	2.13567	67					HCMVTB-pS22-C03-U-11	0.901319	67		HCMVTB-pS22-C05-I-08	2.01176	67
HCMVTB-pS22-A05-U-34	0.88588	68		HCMVTB-pS22-A05-I-09	1.93178	68					HCMVTB-pS22-B04-U-05	0.931142	68		HCMVTB-pS22-B01-I-12	2.13362	68					HCMVTB-pS22-C04-U-23	0.899039	68		HCMVTB-pS22-C05-I-25	2.00994	68
HCMVTB-pS22-A03-U-01	0.88141	69		HCMVTB-pS22-A05-I-13	1.91716	69					HCMVTB-pS22-B02-U-13	0.924641	69		HCMVTB-pS22-B02-I-15	2.12796	69					HCMVTB-pS22-C05-U-02	0.893798	69		HCMVTB-pS22-C04-I-02	1.95454	69
HCMVTB-pS22-A01-U-02	0.881069	70		HCMVTB-pS22-A04-I-12	1.84472	70					HCMVTB-pS22-B04-U-24	0.922889	70		HCMVTB-pS22-B01-I-17	2.12347	70					HCMVTB-pS22-C03-U-09	0.889259	70		HCMVTB-pS22-C03-I-04	1.93008	70
HCMVTB-pS22-A01-U-26	0.880059	71		HCMVTB-pS22-A02-I-31	1.8324	71					HCMVTB-pS22-B02-U-10	0.922632	71		HCMVTB-pS22-B01-I-19	2.06703	71					HCMVTB-pS22-C05-U-16	0.884084	71		HCMVTB-pS22-C04-I-10	1.86339	71
HCMVTB-pS22-A05-U-05	0.874789	72		HCMVTB-pS22-A01-I-17	1.83031	72					HCMVTB-pS22-B02-U-12	0.921396	72		HCMVTB-pS22-B03-I-02	2.02177	72					HCMVTB-pS22-C04-U-21	0.882575	72		HCMVTB-pS22-C03-I-06	1.8227	72
HCMVTB-pS22-A03-U-05	0.874188	73		HCMVTB-pS22-A01-I-14	1.80742	73					HCMVTB-pS22-B02-U-27	0.915524	73		HCMVTB-pS22-B01-I-21	2.01731	73					HCMVTB-pS22-C05-U-19	0.879921	73		HCMVTB-pS22-C05-I-24	1.80622	73
HCMVTB-pS22-A01-U-14	0.871307	74		HCMVTB-pS22-A01-I-02	1.70424	74					HCMVTB-pS22-B03-U-28	0.910776	74		HCMVTB-pS22-B03-I-19	2.01591	74					HCMVTB-pS22-C04-U-19	0.875091	74		HCMVTB-pS22-C02-I-09	1.79977	74
HCMVTB-pS22-A01-U-10	0.857336	75		HCMVTB-pS22-A02-I-28	1.69421	75					HCMVTB-pS22-B02-U-03	0.905326	75		HCMVTB-pS22-B02-I-08	1.93944	75					HCMVTB-pS22-C04-U-01	0.873594	75		HCMVTB-pS22-C05-I-01	1.77747	75
HCMVTB-pS22-A05-U-30	0.856729	76		HCMVTB-pS22-A03-I-22	1.69407	76					HCMVTB-pS22-B03-U-15	0.903475	76		HCMVTB-pS22-B04-I-05	1.92514	76					HCMVTB-pS22-C03-U-17	0.870273	76		HCMVTB-pS22-C05-I-14	1.66853	76
HCMVTB-pS22-A02-U-13	0.853544	77		HCMVTB-pS22-A03-I-12	1.65023	77					HCMVTB-pS22-B01-U-18	0.895188	77		HCMVTB-pS22-B01-I-03	1.88029	77					HCMVTB-pS22-C05-U-14	0.862645	77		HCMVTB-pS22-C03-I-01	1.65912	77
HCMVTB-pS22-A02-U-02	0.849157	78		HCMVTB-pS22-A04-I-08	1.61108	78					HCMVTB-pS22-B05-U-16	0.894621	78		HCMVTB-pS22-B02-I-07	1.87261	78					HCMVTB-pS22-C05-U-17	0.849392	78		HCMVTB-pS22-C05-I-16	1.59539	78
HCMVTB-pS22-A05-U-28	0.84382	79		HCMVTB-pS22-A02-I-10	1.59296	79					HCMVTB-pS22-B04-U-12	0.88947	79		HCMVTB-pS22-B02-I-22	1.8628	79					HCMVTB-pS22-C04-U-18	0.847775	79		HCMVTB-pS22-C04-I-05	1.55532	79
HCMVTB-pS22-A02-U-08	0.839109	80		HCMVTB-pS22-A04-I-11	1.56285	80					HCMVTB-pS22-B02-U-25	0.884852	80		HCMVTB-pS22-B05-I-12	1.79481	80					HCMVTB-pS22-C04-U-17	0.843584	80		HCMVTB-pS22-C05-I-04	1.5239	80
HCMVTB-pS22-A05-U-20	0.838668	81		HCMVTB-pS22-A01-I-06	1.55687	81					HCMVTB-pS22-B01-U-10	0.882706	81		HCMVTB-pS22-B03-I-24	1.79395	81					HCMVTB-pS22-C01-U-04	0.842004	81		HCMVTB-pS22-C02-I-04	1.51564	81
HCMVTB-pS22-A05-U-03	0.833274	82		HCMVTB-pS22-A01-I-07	1.55098	82					HCMVTB-pS22-B03-U-02	0.877998	82		HCMVTB-pS22-B01-I-15	1.79387	82					HCMVTB-pS22-C01-U-09	0.836993	82		HCMVTB-pS22-C05-I-11	1.49444	82
HCMVTB-pS22-A01-U-12	0.83293	83		HCMVTB-pS22-A02-I-32	1.51236	83					HCMVTB-pS22-B03-U-23	0.877104	83		HCMVTB-pS22-B01-I-02	1.79072	83					HCMVTB-pS22-C03-U-02	0.834403	83		HCMVTB-pS22-C05-I-23	1.41719	83
HCMVTB-pS22-A01-U-13	0.830068	84		HCMVTB-pS22-A03-I-10	1.51088	84					HCMVTB-pS22-B03-U-18	0.874571	84		HCMVTB-pS22-B01-I-14	1.78825	84					HCMVTB-pS22-C03-U-21	0.819932	84		HCMVTB-pS22-C05-I-13	1.37798	84
HCMVTB-pS22-A01-U-23	0.829479	85		HCMVTB-pS22-A03-I-20	1.50658	85					HCMVTB-pS22-B01-U-11	0.874476	85		HCMVTB-pS22-B01-I-06	1.75972	85					HCMVTB-pS22-C03-U-22	0.817953	85		HCMVTB-pS22-C02-I-12	1.367	85
HCMVTB-pS22-A01-U-05	0.818959	86		HCMVTB-pS22-A02-I-09	1.47147	86					HCMVTB-pS22-B05-U-03	0.874254	86		HCMVTB-pS22-B05-I-15	1.74877	86					HCMVTB-pS22-C03-U-01	0.816963	86		HCMVTB-pS22-C01-I-12	1.34423	86
HCMVTB-pS22-A04-U-10	0.818086	87		HCMVTB-pS22-A02-I-22	1.4634	87					HCMVTB-pS22-B02-U-20	0.869323	87		HCMVTB-pS22-B01-I-11	1.74813	87					HCMVTB-pS22-C03-U-06	0.813624	87		HCMVTB-pS22-C05-I-12	1.34006	87
HCMVTB-pS22-A01-U-24	0.811469	88		HCMVTB-pS22-A02-I-33	1.41656	88					HCMVTB-pS22-B02-U-19	0.8677	88		HCMVTB-pS22-B02-I-02	1.69893	88					HCMVTB-pS22-C05-U-21	0.813174	88		HCMVTB-pS22-C05-I-18	1.33429	88
HCMVTB-pS22-A04-U-17	0.806983	89		HCMVTB-pS22-A05-I-02	1.40774	89					HCMVTB-pS22-B02-U-26	0.866001	89		HCMVTB-pS22-B04-I-03	1.69155	89					HCMVTB-pS22-C01-U-05	0.813102	89		HCMVTB-pS22-C05-I-07	1.28814	89
HCMVTB-pS22-A04-U-01	0.804935	90		HCMVTB-pS22-A03-I-18	1.37997	90					HCMVTB-pS22-B02-U-14	0.861829	90		HCMVTB-pS22-B03-I-17	1.65303	90					HCMVTB-pS22-C05-U-11	0.809636	90		HCMVTB-pS22-C02-I-08	1.27909	90
HCMVTB-pS22-A01-U-06	0.796236	91		HCMVTB-pS22-A03-I-21	1.29584	91					HCMVTB-pS22-B05-U-04	0.860733	91		HCMVTB-pS22-B01-I-16	1.64951	91					HCMVTB-pS22-C03-U-08	0.807316	91		HCMVTB-pS22-C02-I-16	1.26544	91
HCMVTB-pS22-A05-U-18	0.796062	92		HCMVTB-pS22-A01-I-10	1.28226	92					HCMVTB-pS22-B05-U-07	0.857983	92		HCMVTB-pS22-B05-I-02	1.62064	92					HCMVTB-pS22-C05-U-12	0.806444	92		HCMVTB-pS22-C01-I-11	1.21286	92
HCMVTB-pS22-A04-U-25	0.794856	93		HCMVTB-pS22-A02-I-16	1.27625	93					HCMVTB-pS22-B05-U-20	0.85501	93		HCMVTB-pS22-B02-I-26	1.55307	93					HCMVTB-pS22-C05-U-25	0.80235	93		HCMVTB-pS22-C05-I-05	1.20225	93
HCMVTB-pS22-A01-U-20	0.789503	94		HCMVTB-pS22-A02-I-05	1.25268	94					HCMVTB-pS22-B01-U-01	0.852119	94		HCMVTB-pS22-B02-I-20	1.55253	94					HCMVTB-pS22-C04-U-15	0.791496	94		HCMVTB-pS22-C03-I-05	1.19734	94
HCMVTB-pS22-A05-U-35	0.785819	95		HCMVTB-pS22-A05-I-01	1.21667	95					HCMVTB-pS22-B01-U-03	0.849581	95		HCMVTB-pS22-B01-I-01	1.50563	95					HCMVTB-pS22-C02-U-12	0.768166	95		HCMVTB-pS22-C04-I-04	1.17602	95
HCMVTB-pS22-A03-U-19	0.776727	96		HCMVTB-pS22-A03-I-17	1.18239	96					HCMVTB-pS22-B01-U-05	0.84917	96		HCMVTB-pS22-B04-I-11	1.50232	96					HCMVTB-pS22-C04-U-26	0.753478	96		HCMVTB-pS22-C01-I-30	1.14206	96
HCMVTB-pS22-A05-U-29	0.77285	97		HCMVTB-pS22-A03-I-15	1.14328	97					HCMVTB-pS22-B01-U-12	0.847867	97		HCMVTB-pS22-B03-I-05	1.39627	97					HCMVTB-pS22-C03-U-10	0.747327	97		HCMVTB-pS22-C02-I-13	1.10628	97
HCMVTB-pS22-A04-U-13	0.768319	98		HCMVTB-pS22-A02-I-11	1.12207	98					HCMVTB-pS22-B03-U-22	0.843581	98		HCMVTB-pS22-B04-I-19	1.33535	98					HCMVTB-pS22-C03-U-18	0.73706	98		HCMVTB-pS22-C01-I-13	1.09479	98
HCMVTB-pS22-A03-U-13	0.767154	99		HCMVTB-pS22-A03-I-05	1.10146	99					HCMVTB-pS22-B01-U-02	0.84286	99		HCMVTB-pS22-B01-I-04	1.28699	99					HCMVTB-pS22-C02-U-05	0.731876	99		HCMVTB-pS22-C01-I-19	1.09101	99
HCMVTB-pS22-A04-U-22	0.759814	100		HCMVTB-pS22-A03-I-03	1.03966	100					HCMVTB-pS22-B03-U-20	0.841943	100		HCMVTB-pS22-B03-I-12	1.26435	100					HCMVTB-pS22-C03-U-12	0.716714	100		HCMVTB-pS22-C01-I-03	1.04838	100
HCMVTB-pS22-A05-U-32	0.755638	101		HCMVTB-pS22-A03-I-16	0.971406	101					HCMVTB-pS22-B03-U-19	0.840825	101		HCMVTB-pS22-B04-I-17	1.23842	101					HCMVTB-pS22-C03-U-20	0.714858	101		HCMVTB-pS22-C05-I-20	1.04415	101
HCMVTB-pS22-A04-U-19	0.741545	102		HCMVTB-pS22-A03-I-06	0.808511	102					HCMVTB-pS22-B03-U-08	0.834195	102		HCMVTB-pS22-B05-I-01	1.17962	102					HCMVTB-pS22-C05-U-05	0.707295	102		HCMVTB-pS22-C01-I-31	1.00677	102
HCMVTB-pS22-A05-U-11	0.741274	103		HCMVTB-pS22-A03-I-02	0.794183	103					HCMVTB-pS22-B05-U-13	0.832455	103		HCMVTB-pS22-B05-I-03	1.13759	103					HCMVTB-pS22-C01-U-14	0.707225	103		HCMVTB-pS22-C01-I-20	1.00605	103
HCMVTB-pS22-A01-U-21	0.73926	104		HCMVTB-pS22-A02-I-21	0.752715	104					HCMVTB-pS22-B04-U-13	0.822165	104		HCMVTB-pS22-B04-I-04	1.12943	104					HCMVTB-pS22-C03-U-14	0.69581	104		HCMVTB-pS22-C01-I-32	0.999657	104
HCMVTB-pS22-A02-U-11	0.737077	105		HCMVTB-pS22-A03-I-01	0.735703	105					HCMVTB-pS22-B04-U-21	0.821359	105		HCMVTB-pS22-B04-I-02	1.03706	105					HCMVTB-pS22-C03-U-04	0.66328	105		HCMVTB-pS22-C01-I-23	0.997987	105
HCMVTB-pS22-A05-U-10	0.725213	106									HCMVTB-pS22-B01-U-09	0.813851	106		HCMVTB-pS22-B02-I-18	0.975632	106					HCMVTB-pS22-C02-U-15	0.657344	106		HCMVTB-pS22-C01-I-02	0.994937	106
HCMVTB-pS22-A03-U-08	0.724889	107									HCMVTB-pS22-B03-U-04	0.802162	107		HCMVTB-pS22-B04-I-16	0.95906	107					HCMVTB-pS22-C02-U-01	0.64592	107		HCMVTB-pS22-C01-I-01	0.97395	107
HCMVTB-pS22-A03-U-07	0.720746	108									HCMVTB-pS22-B02-U-29	0.802107	108		HCMVTB-pS22-B01-I-07	0.933867	108									HCMVTB-pS22-C05-I-03	0.959198	108
HCMVTB-pS22-A05-U-16	0.710486	109									HCMVTB-pS22-B02-U-21	0.798785	109		HCMVTB-pS22-B03-I-25	0.806811	109									HCMVTB-pS22-C01-I-28	0.955578	109
HCMVTB-pS22-A05-U-04	0.681031	110									HCMVTB-pS22-B03-U-17	0.794117	110													HCMVTB-pS22-C02-I-14	0.935062	110
HCMVTB-pS22-A03-U-09	0.679769	111									HCMVTB-pS22-B05-U-12	0.787289	111													HCMVTB-pS22-C01-I-22	0.932413	111
HCMVTB-pS22-A03-U-21	0.672939	112									HCMVTB-pS22-B02-U-22	0.780011	112													HCMVTB-pS22-C02-I-18	0.902811	112
HCMVTB-pS22-A03-U-10	0.671484	113									HCMVTB-pS22-B05-U-17	0.776124	113													HCMVTB-pS22-C01-I-05	0.842004	113
HCMVTB-pS22-A05-U-26	0.66594	114									HCMVTB-pS22-B03-U-29	0.771023	114													HCMVTB-pS22-C01-I-18	0.836993	114
HCMVTB-pS22-A05-U-07	0.660122	115									HCMVTB-pS22-B05-U-09	0.768325	115													HCMVTB-pS22-C01-I-08	0.813102	115
HCMVTB-pS22-A05-U-13	0.659395	116									HCMVTB-pS22-B04-U-04	0.76063	116													HCMVTB-pS22-C05-I-09	0.768476	116
HCMVTB-pS22-A05-U-12	0.651334	117									HCMVTB-pS22-B04-U-18	0.760361	117													HCMVTB-pS22-C01-I-25	0.707225	117
HCMVTB-pS22-A03-U-18	0.611249	118									HCMVTB-pS22-B01-U-13	0.740743	118
HCMVTB-pS22-A05-U-02	0.533334	119									HCMVTB-pS22-B03-U-27	0.740704	119
HCMVTB-pS22-A03-U-11	0.526831	120									HCMVTB-pS22-B05-U-10	0.731912	120
HCMVTB-pS22-A03-U-15	0.50052	121									HCMVTB-pS22-B05-U-08	0.730285	121
HCMVTB-pS22-A03-U-17	0.451873	122									HCMVTB-pS22-B02-U-04	0.717972	122
											HCMVTB-pS22-B02-U-02	0.717045	123
											HCMVTB-pS22-B03-U-03	0.704872	124
											HCMVTB-pS22-B01-U-04	0.701858	125
											HCMVTB-pS22-B03-U-32	0.701519	126
											HCMVTB-pS22-B05-U-01	0.694657	127
											HCMVTB-pS22-B04-U-23	0.661785	128
											HCMVTB-pS22-B05-U-19	0.634005	129

## Sheet: HCMVdelUL97
HCMVDUL97-pS22-A											HCMVDUL97-pS22-B											HCMVDUL97-pS22-C
Uninfected				Infected							Uninfected				Infected
#	pS22	n=		#	pS22	n=					#	pS22	n=		#	pS22	n=					#	pS22	n=		#	pS22	n=
HCMVDUL97-pS22-A03-U-08	2.16311	1		HCMVDUL97-pS22-A01-I-18	2.92051	1		Uninfected (HCMVDUL97-pS22-A)			HCMVDUL97-pS22-B01-U-08	3.76858	1		HCMVDUL97-pS22-B03-I-16	2.48574	1		Uninfected (HCMVDUL97-pS22-B)			HCMVDUL97-pS22-C01-U-12	2.40102	1		HCMVDUL97-pS22-C03-I-04	2.22904	1		Uninfected (HCMVDUL97-pS22-C)
HCMVDUL97-pS22-A02-U-12	2.0561	2		HCMVDUL97-pS22-A01-I-17	2.10604	2		Mean	1		HCMVDUL97-pS22-B02-U-18	2.77503	2		HCMVDUL97-pS22-B03-I-18	2.28539	2		Mean	1		HCMVDUL97-pS22-C04-U-15	2.28305	2		HCMVDUL97-pS22-C02-I-06	2.03859	2		Mean	1
HCMVDUL97-pS22-A01-U-04	1.87027	3		HCMVDUL97-pS22-A04-I-14	1.84	3		SD	0.400526		HCMVDUL97-pS22-B03-U-12	2.38125	3		HCMVDUL97-pS22-B03-I-19	2.05242	3		SD	0.559617		HCMVDUL97-pS22-C01-U-14	1.912	3		HCMVDUL97-pS22-C03-I-07	1.96275	3		SD	0.376022
HCMVDUL97-pS22-A02-U-11	1.73267	4		HCMVDUL97-pS22-A04-I-17	1.77453	4		n=	41		HCMVDUL97-pS22-B02-U-03	2.24452	4		HCMVDUL97-pS22-B03-I-17	1.77236	4		n=	65		HCMVDUL97-pS22-C03-U-01	1.80908	4		HCMVDUL97-pS22-C02-I-14	1.88529	4		n=	69
HCMVDUL97-pS22-A02-U-10	1.49397	5		HCMVDUL97-pS22-A01-I-08	1.69999	5		Increased	0.121951		HCMVDUL97-pS22-B03-U-09	2.09822	5		HCMVDUL97-pS22-B01-I-09	1.67658	5		Increased	0.0923077		HCMVDUL97-pS22-C03-U-03	1.53978	5		HCMVDUL97-pS22-C01-I-17	1.86291	5		Increased	0.0869565
HCMVDUL97-pS22-A03-U-04	1.40036	6		HCMVDUL97-pS22-A01-I-04	1.69453	6					HCMVDUL97-pS22-B02-U-10	1.57583	6		HCMVDUL97-pS22-B03-I-10	1.63624	6					HCMVDUL97-pS22-C03-U-12	1.39673	6		HCMVDUL97-pS22-C03-I-12	1.79672	6
HCMVDUL97-pS22-A01-U-03	1.37292	7		HCMVDUL97-pS22-A01-I-12	1.52286	7					HCMVDUL97-pS22-B03-U-29	1.46404	7		HCMVDUL97-pS22-B01-I-15	1.48729	7					HCMVDUL97-pS22-C03-U-13	1.3751	7		HCMVDUL97-pS22-C02-I-09	1.76818	7
HCMVDUL97-pS22-A04-U-02	1.33547	8		HCMVDUL97-pS22-A01-I-03	1.43243	8		Infected (HCMVDUL97-pS22-A)			HCMVDUL97-pS22-B02-U-04	1.4511	8		HCMVDUL97-pS22-B01-I-20	1.45817	8		Infected (HCMVDUL97-pS22-B)			HCMVDUL97-pS22-C03-U-04	1.37494	8		HCMVDUL97-pS22-C04-I-01	1.70639	8		Infected (HCMVDUL97-pS22-C)
HCMVDUL97-pS22-A04-U-04	1.17198	9		HCMVDUL97-pS22-A04-I-12	1.39948	9		mean	1.02287		HCMVDUL97-pS22-B03-U-10	1.40179	9		HCMVDUL97-pS22-B03-I-06	1.37928	9		mean	1.05688		HCMVDUL97-pS22-C04-U-08	1.35305	9		HCMVDUL97-pS22-C04-I-05	1.68757	9		mean	1.0152
HCMVDUL97-pS22-A04-U-03	1.12024	10		HCMVDUL97-pS22-A03-I-14	1.39269	10		SD	0.423795		HCMVDUL97-pS22-B02-U-21	1.34632	10		HCMVDUL97-pS22-B03-I-13	1.27509	10		SD	0.426984		HCMVDUL97-pS22-C02-U-15	1.26823	10		HCMVDUL97-pS22-C02-I-15	1.44791	10		SD	0.388925
HCMVDUL97-pS22-A01-U-11	1.11627	11		HCMVDUL97-pS22-A02-I-01	1.35201	11		n=	66		HCMVDUL97-pS22-B03-U-06	1.30394	11		HCMVDUL97-pS22-B03-I-05	1.23484	11		n=	53		HCMVDUL97-pS22-C04-U-10	1.26533	11		HCMVDUL97-pS22-C04-I-04	1.44514	11		n=	81
HCMVDUL97-pS22-A01-U-02	1.07389	12		HCMVDUL97-pS22-A02-I-03	1.28754	12		Increased	0.121212		HCMVDUL97-pS22-B01-U-13	1.27475	12		HCMVDUL97-pS22-B01-I-13	1.23475	12		Increased	0.113208		HCMVDUL97-pS22-C01-U-16	1.23707	12		HCMVDUL97-pS22-C03-I-11	1.42479	12		Increased	0.148148
HCMVDUL97-pS22-A02-U-03	1.06736	13		HCMVDUL97-pS22-A01-I-13	1.27553	13					HCMVDUL97-pS22-B03-U-24	1.12985	13		HCMVDUL97-pS22-B03-I-09	1.23415	13					HCMVDUL97-pS22-C01-U-20	1.22875	13		HCMVDUL97-pS22-C02-I-10	1.3731	13
HCMVDUL97-pS22-A04-U-08	1.02329	14		HCMVDUL97-pS22-A04-I-20	1.2682	14					HCMVDUL97-pS22-B03-U-16	1.12232	14		HCMVDUL97-pS22-B03-I-15	1.19727	14					HCMVDUL97-pS22-C02-U-02	1.22659	14		HCMVDUL97-pS22-C02-I-07	1.32938	14
HCMVDUL97-pS22-A04-U-01	1.00555	15		HCMVDUL97-pS22-A04-I-06	1.2346	15					HCMVDUL97-pS22-B02-U-13	1.08379	15		HCMVDUL97-pS22-B03-I-11	1.19568	15					HCMVDUL97-pS22-C01-U-11	1.2184	15		HCMVDUL97-pS22-C01-I-04	1.31953	15
HCMVDUL97-pS22-A04-U-05	0.989118	16		HCMVDUL97-pS22-A04-I-11	1.2055	16					HCMVDUL97-pS22-B03-U-05	1.03399	16		HCMVDUL97-pS22-B01-I-19	1.18254	16					HCMVDUL97-pS22-C03-U-09	1.20003	16		HCMVDUL97-pS22-C02-I-20	1.31327	16
HCMVDUL97-pS22-A03-U-05	0.987841	17		HCMVDUL97-pS22-A01-I-09	1.18916	17					HCMVDUL97-pS22-B03-U-13	0.989874	17		HCMVDUL97-pS22-B03-I-01	1.17952	17					HCMVDUL97-pS22-C02-U-03	1.19936	17		HCMVDUL97-pS22-C02-I-12	1.2915	17
HCMVDUL97-pS22-A01-U-01	0.917635	18		HCMVDUL97-pS22-A01-I-02	1.18852	18					HCMVDUL97-pS22-B02-U-17	0.962449	18		HCMVDUL97-pS22-B01-I-18	1.17899	18					HCMVDUL97-pS22-C02-U-05	1.1741	18		HCMVDUL97-pS22-C04-I-08	1.26593	18
HCMVDUL97-pS22-A01-U-10	0.905327	19		HCMVDUL97-pS22-A03-I-09	1.14964	19					HCMVDUL97-pS22-B03-U-21	0.943082	19		HCMVDUL97-pS22-B02-I-07	1.16553	19					HCMVDUL97-pS22-C02-U-13	1.16553	19		HCMVDUL97-pS22-C01-I-31	1.21627	19
HCMVDUL97-pS22-A02-U-01	0.897898	20		HCMVDUL97-pS22-A01-I-01	1.12687	20					HCMVDUL97-pS22-B02-U-07	0.919462	20		HCMVDUL97-pS22-B03-I-08	1.13471	20					HCMVDUL97-pS22-C03-U-06	1.1524	20		HCMVDUL97-pS22-C02-I-17	1.20689	20
HCMVDUL97-pS22-A03-U-07	0.896932	21		HCMVDUL97-pS22-A01-I-07	1.10557	21					HCMVDUL97-pS22-B03-U-02	0.914333	21		HCMVDUL97-pS22-B02-I-14	1.0978	21					HCMVDUL97-pS22-C02-U-08	1.13981	21		HCMVDUL97-pS22-C01-I-07	1.16081	21
HCMVDUL97-pS22-A01-U-07	0.882317	22		HCMVDUL97-pS22-A01-I-10	1.1029	22					HCMVDUL97-pS22-B02-U-19	0.906858	22		HCMVDUL97-pS22-B01-I-12	1.06739	22					HCMVDUL97-pS22-C01-U-18	1.13575	22		HCMVDUL97-pS22-C02-I-19	1.15762	22
HCMVDUL97-pS22-A01-U-09	0.877929	23		HCMVDUL97-pS22-A01-I-05	1.09787	23					HCMVDUL97-pS22-B03-U-18	0.893018	23		HCMVDUL97-pS22-B03-I-07	1.05154	23					HCMVDUL97-pS22-C04-U-12	1.11957	23		HCMVDUL97-pS22-C03-I-18	1.14099	23
HCMVDUL97-pS22-A02-U-06	0.858384	24		HCMVDUL97-pS22-A04-I-19	1.08116	24					HCMVDUL97-pS22-B01-U-06	0.892235	24		HCMVDUL97-pS22-B02-I-11	1.04635	24					HCMVDUL97-pS22-C01-U-02	1.10201	24		HCMVDUL97-pS22-C02-I-03	1.12558	24
HCMVDUL97-pS22-A01-U-08	0.850744	25		HCMVDUL97-pS22-A01-I-06	1.07304	25					HCMVDUL97-pS22-B03-U-28	0.888954	25		HCMVDUL97-pS22-B01-I-17	0.997036	25					HCMVDUL97-pS22-C02-U-11	1.09797	25		HCMVDUL97-pS22-C01-I-25	1.12143	25
HCMVDUL97-pS22-A02-U-13	0.849126	26		HCMVDUL97-pS22-A03-I-06	1.05462	26					HCMVDUL97-pS22-B01-U-04	0.888682	26		HCMVDUL97-pS22-B01-I-14	0.975257	26					HCMVDUL97-pS22-C03-U-02	1.09114	26		HCMVDUL97-pS22-C01-I-18	1.11505	26
HCMVDUL97-pS22-A04-U-07	0.84026	27		HCMVDUL97-pS22-A01-I-15	1.05024	27					HCMVDUL97-pS22-B01-U-02	0.880187	27		HCMVDUL97-pS22-B02-I-10	0.9743	27					HCMVDUL97-pS22-C02-U-01	1.073	27		HCMVDUL97-pS22-C02-I-05	1.06961	27
HCMVDUL97-pS22-A02-U-07	0.816655	28		HCMVDUL97-pS22-A02-I-07	1.03315	28					HCMVDUL97-pS22-B03-U-22	0.860601	28		HCMVDUL97-pS22-B02-I-06	0.937616	28					HCMVDUL97-pS22-C01-U-15	1.05792	28		HCMVDUL97-pS22-C02-I-16	1.05793	28
HCMVDUL97-pS22-A03-U-02	0.788128	29		HCMVDUL97-pS22-A04-I-05	1.01421	29					HCMVDUL97-pS22-B02-U-16	0.854088	29		HCMVDUL97-pS22-B01-I-08	0.93	29					HCMVDUL97-pS22-C04-U-13	1.01115	29		HCMVDUL97-pS22-C01-I-32	1.0532	29
HCMVDUL97-pS22-A01-U-05	0.778181	30		HCMVDUL97-pS22-A03-I-12	1.00892	30					HCMVDUL97-pS22-B03-U-27	0.838196	30		HCMVDUL97-pS22-B02-I-08	0.910808	30					HCMVDUL97-pS22-C03-U-07	0.995324	30		HCMVDUL97-pS22-C01-I-29	1.04636	30
HCMVDUL97-pS22-A02-U-09	0.745811	31		HCMVDUL97-pS22-A04-I-08	0.985766	31					HCMVDUL97-pS22-B03-U-26	0.805085	31		HCMVDUL97-pS22-B02-I-12	0.907892	31					HCMVDUL97-pS22-C01-U-04	0.990434	31		HCMVDUL97-pS22-C02-I-18	1.03908	31
HCMVDUL97-pS22-A02-U-05	0.710053	32		HCMVDUL97-pS22-A03-I-08	0.980172	32					HCMVDUL97-pS22-B03-U-04	0.803994	32		HCMVDUL97-pS22-B02-I-05	0.8951	32					HCMVDUL97-pS22-C04-U-02	0.98646	32		HCMVDUL97-pS22-C01-I-16	1.03176	32
HCMVDUL97-pS22-A03-U-03	0.693416	33		HCMVDUL97-pS22-A02-I-11	0.975384	33					HCMVDUL97-pS22-B03-U-25	0.800723	33		HCMVDUL97-pS22-B01-I-16	0.881577	33					HCMVDUL97-pS22-C01-U-08	0.97777	33		HCMVDUL97-pS22-C03-I-03	1.02156	33
HCMVDUL97-pS22-A01-U-12	0.692026	34		HCMVDUL97-pS22-A03-I-16	0.967328	34					HCMVDUL97-pS22-B03-U-01	0.797253	34		HCMVDUL97-pS22-B03-I-14	0.876264	34					HCMVDUL97-pS22-C02-U-09	0.936287	34		HCMVDUL97-pS22-C02-I-11	1.00987	34
HCMVDUL97-pS22-A02-U-08	0.663226	35		HCMVDUL97-pS22-A04-I-16	0.957074	35					HCMVDUL97-pS22-B02-U-09	0.79624	35		HCMVDUL97-pS22-B01-I-04	0.86003	35					HCMVDUL97-pS22-C04-U-04	0.927121	35		HCMVDUL97-pS22-C04-I-07	0.972123	35
HCMVDUL97-pS22-A01-U-06	0.662487	36		HCMVDUL97-pS22-A03-I-05	0.935092	36					HCMVDUL97-pS22-B03-U-08	0.795171	36		HCMVDUL97-pS22-B03-I-02	0.813809	36					HCMVDUL97-pS22-C04-U-01	0.915472	36		HCMVDUL97-pS22-C02-I-08	0.968511	36
HCMVDUL97-pS22-A03-U-01	0.62433	37		HCMVDUL97-pS22-A04-I-07	0.882522	37					HCMVDUL97-pS22-B01-U-09	0.794771	37		HCMVDUL97-pS22-B02-I-09	0.799626	37					HCMVDUL97-pS22-C01-U-19	0.897899	37		HCMVDUL97-pS22-C03-I-17	0.964971	37
HCMVDUL97-pS22-A02-U-04	0.559308	38		HCMVDUL97-pS22-A01-I-16	0.851386	38					HCMVDUL97-pS22-B03-U-17	0.793783	38		HCMVDUL97-pS22-B02-I-03	0.784952	38					HCMVDUL97-pS22-C02-U-14	0.896525	38		HCMVDUL97-pS22-C03-I-09	0.964495	38
HCMVDUL97-pS22-A02-U-02	0.549446	39		HCMVDUL97-pS22-A02-I-02	0.844497	39					HCMVDUL97-pS22-B03-U-11	0.791007	39		HCMVDUL97-pS22-B01-I-02	0.774846	39					HCMVDUL97-pS22-C03-U-15	0.877714	39		HCMVDUL97-pS22-C01-I-19	0.957247	39
HCMVDUL97-pS22-A04-U-06	0.514096	40		HCMVDUL97-pS22-A03-I-15	0.840254	40					HCMVDUL97-pS22-B01-U-11	0.786894	40		HCMVDUL97-pS22-B01-I-05	0.770984	40					HCMVDUL97-pS22-C01-U-21	0.863787	40		HCMVDUL97-pS22-C03-I-19	0.939452	40
HCMVDUL97-pS22-A03-U-06	0.445879	41		HCMVDUL97-pS22-A04-I-01	0.833638	41					HCMVDUL97-pS22-B03-U-23	0.786844	41		HCMVDUL97-pS22-B03-I-04	0.741043	41					HCMVDUL97-pS22-C04-U-07	0.854142	41		HCMVDUL97-pS22-C04-I-03	0.922541	41
				HCMVDUL97-pS22-A01-I-11	0.833299	42					HCMVDUL97-pS22-B02-U-05	0.785705	42		HCMVDUL97-pS22-B02-I-13	0.72795	42					HCMVDUL97-pS22-C02-U-07	0.841122	42		HCMVDUL97-pS22-C04-I-06	0.920848	42
				HCMVDUL97-pS22-A04-I-02	0.811649	43					HCMVDUL97-pS22-B02-U-14	0.7842	43		HCMVDUL97-pS22-B01-I-03	0.698543	43					HCMVDUL97-pS22-C04-U-14	0.838311	43		HCMVDUL97-pS22-C03-I-02	0.89412	43
				HCMVDUL97-pS22-A04-I-10	0.809196	44					HCMVDUL97-pS22-B03-U-15	0.783671	44		HCMVDUL97-pS22-B03-I-03	0.695143	44					HCMVDUL97-pS22-C04-U-05	0.815213	44		HCMVDUL97-pS22-C01-I-20	0.870813	44
				HCMVDUL97-pS22-A02-I-06	0.790357	45					HCMVDUL97-pS22-B03-U-07	0.760672	45		HCMVDUL97-pS22-B03-I-12	0.691673	45					HCMVDUL97-pS22-C02-U-04	0.812008	45		HCMVDUL97-pS22-C01-I-21	0.848442	45
				HCMVDUL97-pS22-A03-I-02	0.788502	46					HCMVDUL97-pS22-B03-U-20	0.757103	46		HCMVDUL97-pS22-B01-I-01	0.672053	46					HCMVDUL97-pS22-C01-U-07	0.808876	46		HCMVDUL97-pS22-C03-I-20	0.847836	46
				HCMVDUL97-pS22-A01-I-14	0.784496	47					HCMVDUL97-pS22-B01-U-03	0.752449	47		HCMVDUL97-pS22-B01-I-06	0.633129	47					HCMVDUL97-pS22-C03-U-08	0.80504	47		HCMVDUL97-pS22-C01-I-08	0.842341	47
				HCMVDUL97-pS22-A04-I-18	0.780749	48					HCMVDUL97-pS22-B02-U-15	0.73905	48		HCMVDUL97-pS22-B01-I-11	0.621313	48					HCMVDUL97-pS22-C02-U-06	0.786191	48		HCMVDUL97-pS22-C02-I-02	0.831794	48
				HCMVDUL97-pS22-A03-I-17	0.779025	49					HCMVDUL97-pS22-B03-U-14	0.733707	49		HCMVDUL97-pS22-B02-I-01	0.602283	49					HCMVDUL97-pS22-C04-U-06	0.780068	49		HCMVDUL97-pS22-C01-I-28	0.81128	49
				HCMVDUL97-pS22-A03-I-07	0.745542	50					HCMVDUL97-pS22-B02-U-22	0.731901	50		HCMVDUL97-pS22-B01-I-10	0.595055	50					HCMVDUL97-pS22-C01-U-09	0.75415	50		HCMVDUL97-pS22-C01-I-23	0.801943	50
				HCMVDUL97-pS22-A04-I-09	0.730966	51					HCMVDUL97-pS22-B02-U-01	0.719015	51		HCMVDUL97-pS22-B02-I-04	0.542177	51					HCMVDUL97-pS22-C01-U-06	0.751099	51		HCMVDUL97-pS22-C01-I-33	0.784102	51
				HCMVDUL97-pS22-A03-I-13	0.714491	52					HCMVDUL97-pS22-B01-U-05	0.672362	52		HCMVDUL97-pS22-B02-I-02	0.515745	52					HCMVDUL97-pS22-C02-U-12	0.70092	52		HCMVDUL97-pS22-C01-I-03	0.774025	52
				HCMVDUL97-pS22-A02-I-09	0.690866	53					HCMVDUL97-pS22-B03-U-19	0.665997	53		HCMVDUL97-pS22-B01-I-07	0.478593	53					HCMVDUL97-pS22-C03-U-18	0.692899	53		HCMVDUL97-pS22-C01-I-30	0.745923	53
				HCMVDUL97-pS22-A04-I-03	0.658376	54					HCMVDUL97-pS22-B03-U-03	0.661536	54									HCMVDUL97-pS22-C03-U-17	0.685291	54		HCMVDUL97-pS22-C03-I-06	0.745681	54
				HCMVDUL97-pS22-A02-I-08	0.642698	55					HCMVDUL97-pS22-B02-U-08	0.661354	55									HCMVDUL97-pS22-C02-U-10	0.682358	55		HCMVDUL97-pS22-C01-I-10	0.737695	55
				HCMVDUL97-pS22-A04-I-13	0.641292	56					HCMVDUL97-pS22-B02-U-02	0.652606	56									HCMVDUL97-pS22-C04-U-03	0.671247	56		HCMVDUL97-pS22-C01-I-27	0.736586	56
				HCMVDUL97-pS22-A03-I-03	0.640479	57					HCMVDUL97-pS22-B02-U-11	0.641789	57									HCMVDUL97-pS22-C01-U-05	0.66901	57		HCMVDUL97-pS22-C01-I-09	0.735199	57
				HCMVDUL97-pS22-A04-I-15	0.637858	58					HCMVDUL97-pS22-B02-U-12	0.636145	58									HCMVDUL97-pS22-C03-U-10	0.663576	58		HCMVDUL97-pS22-C01-I-14	0.731686	58
				HCMVDUL97-pS22-A03-I-04	0.609864	59					HCMVDUL97-pS22-B02-U-06	0.628244	59									HCMVDUL97-pS22-C04-U-09	0.661091	59		HCMVDUL97-pS22-C04-I-02	0.728295	59
				HCMVDUL97-pS22-A02-I-05	0.571786	60					HCMVDUL97-pS22-B01-U-07	0.598067	60									HCMVDUL97-pS22-C01-U-10	0.637764	60		HCMVDUL97-pS22-C01-I-26	0.720316	60
				HCMVDUL97-pS22-A04-I-04	0.56862	61					HCMVDUL97-pS22-B01-U-01	0.571577	61									HCMVDUL97-pS22-C01-U-03	0.615486	61		HCMVDUL97-pS22-C01-I-01	0.712736	61
				HCMVDUL97-pS22-A03-I-11	0.534855	62					HCMVDUL97-pS22-B01-U-12	0.568102	62									HCMVDUL97-pS22-C03-U-16	0.611745	62		HCMVDUL97-pS22-C01-I-05	0.711349	62
				HCMVDUL97-pS22-A03-I-01	0.532298	63					HCMVDUL97-pS22-B02-U-23	0.558544	63									HCMVDUL97-pS22-C01-U-17	0.60014	63		HCMVDUL97-pS22-C01-I-13	0.710147	63
				HCMVDUL97-pS22-A02-I-10	0.529789	64					HCMVDUL97-pS22-B01-U-10	0.551343	64									HCMVDUL97-pS22-C01-U-13	0.591913	64		HCMVDUL97-pS22-C01-I-24	0.707929	64
				HCMVDUL97-pS22-A02-I-04	0.48531	65					HCMVDUL97-pS22-B02-U-20	0.545751	65									HCMVDUL97-pS22-C03-U-11	0.583769	65		HCMVDUL97-pS22-C01-I-22	0.692583	65
				HCMVDUL97-pS22-A03-I-10	0.461841	66																HCMVDUL97-pS22-C03-U-05	0.582026	66		HCMVDUL97-pS22-C03-I-01	0.688778	66
																						HCMVDUL97-pS22-C03-U-14	0.563401	67		HCMVDUL97-pS22-C02-I-04	0.688482	67
																						HCMVDUL97-pS22-C01-U-01	0.548742	68		HCMVDUL97-pS22-C01-I-02	0.686852	68
																						HCMVDUL97-pS22-C04-U-11	0.518718	69		HCMVDUL97-pS22-C03-I-15	0.682993	69
																										HCMVDUL97-pS22-C03-I-14	0.678237	70
																										HCMVDUL97-pS22-C03-I-10	0.671263	71
																										HCMVDUL97-pS22-C01-I-12	0.662724	72
																										HCMVDUL97-pS22-C03-I-05	0.649152	73
																										HCMVDUL97-pS22-C02-I-13	0.643727	74
																										HCMVDUL97-pS22-C01-I-15	0.637395	75
																										HCMVDUL97-pS22-C03-I-08	0.629894	76
																										HCMVDUL97-pS22-C01-I-11	0.621402	77
																										HCMVDUL97-pS22-C01-I-06	0.588122	78
																										HCMVDUL97-pS22-C03-I-13	0.586068	79
																										HCMVDUL97-pS22-C02-I-01	0.552143	80
																										HCMVDUL97-pS22-C03-I-16	0.508638	81

## Sheet: HHV6A
HHV6A-pS22-A											HHV6A-pS22-B											HHV6A-pS22-C
Uninfected				Infected							Uninfected				Infected
#	pS22	n=		#	pS22	n=					#	pS22	n=		#	pS22	n=					#	pS22	n=		#	pS22	n=
HHV6A-pS22-A07-U-13	1.94893	1		HHV6A-pS22-A03-I-08	4.65808	1		Uninfected (HHV6A-pS22-A)			HHV6A-pS22-B02-U-12	1.79887	1		HHV6A-pS22-B04-I-03	4.58524	1		Uninfected (HHV6A-pS22-B)			HHV6A-pS22-C04-U-07	1.59903	1		HHV6A-pS22-C01-I-07	2.71489	1		Uninfected (HHV6A-pS22-C)
HHV6A-pS22-A03-U-22	1.60053	2		HHV6A-pS22-A03-I-12	4.43335	2		Mean	1		HHV6A-pS22-B01-U-11	1.60139	2		HHV6A-pS22-B05-I-09	4.40077	2		Mean	1		HHV6A-pS22-C01-U-04	1.50366	2		HHV6A-pS22-C01-I-06	2.42075	2		Mean	1
HHV6A-pS22-A05-U-10	1.42988	3		HHV6A-pS22-A02-I-04	4.31625	3		SD	0.176198		HHV6A-pS22-B04-U-20	1.54969	3		HHV6A-pS22-B02-I-05	4.32629	3		SD	0.213525		HHV6A-pS22-C04-U-14	1.44247	3		HHV6A-pS22-C04-I-06	2.26921	3		SD	0.170601
HHV6A-pS22-A06-U-32	1.37438	4		HHV6A-pS22-A05-I-02	4.14269	4		n=	208		HHV6A-pS22-B03-U-11	1.53536	4		HHV6A-pS22-B03-I-11	4.2404	4		n=	117		HHV6A-pS22-C03-U-25	1.32397	4		HHV6A-pS22-C04-I-02	2.25409	4		n=	110
HHV6A-pS22-A07-U-11	1.35868	5		HHV6A-pS22-A03-I-10	4.1237	5		Increased	0.153846		HHV6A-pS22-B03-U-09	1.46316	5		HHV6A-pS22-B02-I-06	3.50566	5		Increased	0.102564		HHV6A-pS22-C04-U-02	1.28499	5		HHV6A-pS22-C04-I-01	2.19306	5		Increased	0.172727
HHV6A-pS22-A02-U-01	1.34389	6		HHV6A-pS22-A06-I-02	4.04013	6					HHV6A-pS22-B04-U-33	1.43751	6		HHV6A-pS22-B04-I-07	3.39602	6					HHV6A-pS22-C03-U-16	1.27803	6		HHV6A-pS22-C04-I-07	1.98178	6
HHV6A-pS22-A05-U-08	1.32659	7		HHV6A-pS22-A03-I-13	4.02567	7					HHV6A-pS22-B03-U-19	1.40236	7		HHV6A-pS22-B01-I-05	3.2713	7					HHV6A-pS22-C02-U-24	1.27092	7		HHV6A-pS22-C04-I-08	1.98022	7
HHV6A-pS22-A02-U-14	1.30275	8		HHV6A-pS22-A02-I-03	3.89585	8		Infected (HHV6A-pS22-A)			HHV6A-pS22-B04-U-14	1.39419	8		HHV6A-pS22-B01-I-03	3.12132	8		Infected (HHV6A-pS22-B)			HHV6A-pS22-C02-U-22	1.26132	8		HHV6A-pS22-C02-I-05	1.94889	8		Infected (HHV6A-pS22-C)
HHV6A-pS22-A05-U-17	1.29255	9		HHV6A-pS22-A04-I-01	3.70113	9		mean	1.81816		HHV6A-pS22-B01-U-04	1.38993	9		HHV6A-pS22-B04-I-10	2.79704	9		mean	1.79001		HHV6A-pS22-C01-U-19	1.25055	9		HHV6A-pS22-C02-I-02	1.82127	9		mean	1.46457
HHV6A-pS22-A06-U-22	1.2711	10		HHV6A-pS22-A03-I-02	3.51076	10		SD	1.10528		HHV6A-pS22-B05-U-06	1.33136	10		HHV6A-pS22-B02-I-02	2.73138	10		SD	1.0625		HHV6A-pS22-C02-U-13	1.23629	10		HHV6A-pS22-C04-I-03	1.76099	10		SD	0.491266
HHV6A-pS22-A03-U-24	1.26787	11		HHV6A-pS22-A03-I-05	3.33549	11		n=	71		HHV6A-pS22-B04-U-06	1.29259	11		HHV6A-pS22-B04-I-04	2.71714	11		n=	51		HHV6A-pS22-C03-U-21	1.23193	11		HHV6A-pS22-C01-I-09	1.69635	11		n=	36
HHV6A-pS22-A04-U-23	1.26728	12		HHV6A-pS22-A06-I-07	3.29411	12		Increased	0.619718		HHV6A-pS22-B02-U-11	1.24471	12		HHV6A-pS22-B04-I-08	2.52276	12		Increased	0.568627		HHV6A-pS22-C03-U-26	1.23185	12		HHV6A-pS22-C03-I-09	1.61996	12		Increased	0.611111
HHV6A-pS22-A04-U-13	1.26515	13		HHV6A-pS22-A03-I-03	3.09528	13					HHV6A-pS22-B04-U-36	1.20796	13		HHV6A-pS22-B04-I-01	2.38459	13					HHV6A-pS22-C01-U-08	1.22861	13		HHV6A-pS22-C01-I-02	1.59591	13
HHV6A-pS22-A04-U-24	1.25635	14		HHV6A-pS22-A06-I-06	3.0888	14					HHV6A-pS22-B03-U-27	1.20642	14		HHV6A-pS22-B05-I-01	2.31243	14					HHV6A-pS22-C02-U-23	1.2193	14		HHV6A-pS22-C04-I-05	1.51295	14
HHV6A-pS22-A01-U-09	1.25508	15		HHV6A-pS22-A02-I-02	2.69225	15					HHV6A-pS22-B04-U-07	1.18937	15		HHV6A-pS22-B04-I-06	2.1072	15					HHV6A-pS22-C01-U-11	1.19948	15		HHV6A-pS22-C03-I-08	1.47785	15
HHV6A-pS22-A06-U-15	1.25468	16		HHV6A-pS22-A03-I-06	2.5351	16					HHV6A-pS22-B01-U-13	1.18602	16		HHV6A-pS22-B05-I-03	1.98206	16					HHV6A-pS22-C03-U-22	1.19837	16		HHV6A-pS22-C03-I-05	1.44989	16
HHV6A-pS22-A01-U-07	1.24916	17		HHV6A-pS22-A01-I-04	2.34984	17					HHV6A-pS22-B02-U-07	1.1827	17		HHV6A-pS22-B05-I-04	1.72866	17					HHV6A-pS22-C03-U-30	1.18334	17		HHV6A-pS22-C03-I-03	1.38245	17
HHV6A-pS22-A05-U-09	1.2432	18		HHV6A-pS22-A07-I-08	2.31379	18					HHV6A-pS22-B04-U-31	1.18152	18		HHV6A-pS22-B05-I-06	1.72186	18					HHV6A-pS22-C02-U-16	1.17713	18		HHV6A-pS22-C02-I-06	1.34463	18
HHV6A-pS22-A03-U-31	1.24256	19		HHV6A-pS22-A05-I-05	2.09787	19					HHV6A-pS22-B04-U-18	1.1733	19		HHV6A-pS22-B03-I-02	1.59986	19					HHV6A-pS22-C01-U-03	1.17159	19		HHV6A-pS22-C01-I-08	1.32565	19
HHV6A-pS22-A02-U-18	1.23806	20		HHV6A-pS22-A07-I-09	2.09765	20					HHV6A-pS22-B05-U-05	1.15547	20		HHV6A-pS22-B03-I-01	1.53867	20					HHV6A-pS22-C02-U-08	1.16857	20		HHV6A-pS22-C03-I-06	1.32249	20
HHV6A-pS22-A05-U-23	1.23565	21		HHV6A-pS22-A02-I-09	2.0653	21					HHV6A-pS22-B02-U-16	1.13952	21		HHV6A-pS22-B01-I-01	1.4687	21					HHV6A-pS22-C02-U-02	1.16687	21		HHV6A-pS22-C03-I-04	1.18887	21
HHV6A-pS22-A04-U-07	1.23383	22		HHV6A-pS22-A07-I-11	1.79262	22					HHV6A-pS22-B03-U-06	1.11464	22		HHV6A-pS22-B05-I-02	1.46237	22					HHV6A-pS22-C01-U-16	1.16634	22		HHV6A-pS22-C01-I-05	1.18411	22
HHV6A-pS22-A06-U-26	1.21929	23		HHV6A-pS22-A03-I-11	1.76965	23					HHV6A-pS22-B03-U-23	1.11276	23		HHV6A-pS22-B05-I-07	1.4408	23					HHV6A-pS22-C02-U-01	1.16605	23		HHV6A-pS22-C03-I-02	1.14977	23
HHV6A-pS22-A06-U-21	1.2182	24		HHV6A-pS22-A01-I-02	1.75385	24					HHV6A-pS22-B04-U-34	1.10369	24		HHV6A-pS22-B05-I-05	1.43708	24					HHV6A-pS22-C03-U-07	1.15663	24		HHV6A-pS22-C02-I-03	1.13622	24
HHV6A-pS22-A03-U-20	1.21714	25		HHV6A-pS22-A03-I-09	1.73414	25					HHV6A-pS22-B01-U-01	1.1031	25		HHV6A-pS22-B01-I-02	1.37178	25					HHV6A-pS22-C03-U-41	1.14401	25		HHV6A-pS22-C01-I-01	1.09217	25
HHV6A-pS22-A04-U-05	1.209	26		HHV6A-pS22-A05-I-04	1.63202	26					HHV6A-pS22-B03-U-10	1.09999	26		HHV6A-pS22-B04-I-02	1.30851	26					HHV6A-pS22-C03-U-09	1.14199	26		HHV6A-pS22-C03-I-10	1.07611	26
HHV6A-pS22-A01-U-04	1.20432	27		HHV6A-pS22-A01-I-06	1.53517	27					HHV6A-pS22-B01-U-14	1.09712	27		HHV6A-pS22-B01-I-09	1.30418	27					HHV6A-pS22-C01-U-09	1.14022	27		HHV6A-pS22-C02-I-07	1.07064	27
HHV6A-pS22-A06-U-19	1.2041	28		HHV6A-pS22-A02-I-06	1.50154	28					HHV6A-pS22-B04-U-02	1.09385	28		HHV6A-pS22-B05-I-08	1.25645	28					HHV6A-pS22-C03-U-29	1.13451	28		HHV6A-pS22-C02-I-08	1.05609	28
HHV6A-pS22-A03-U-13	1.19957	29		HHV6A-pS22-A07-I-04	1.47715	29					HHV6A-pS22-B03-U-18	1.08943	29		HHV6A-pS22-B03-I-10	1.21848	29					HHV6A-pS22-C03-U-28	1.10453	29		HHV6A-pS22-C04-I-04	1.0285	29
HHV6A-pS22-A03-U-35	1.19564	30		HHV6A-pS22-A07-I-03	1.37717	30					HHV6A-pS22-B03-U-20	1.08411	30		HHV6A-pS22-B03-I-05	1.21297	30					HHV6A-pS22-C02-U-18	1.10262	30		HHV6A-pS22-C03-I-07	1.02627	30
HHV6A-pS22-A02-U-11	1.19535	31		HHV6A-pS22-A06-I-03	1.35955	31					HHV6A-pS22-B01-U-09	1.07693	31		HHV6A-pS22-B01-I-12	1.18102	31					HHV6A-pS22-C04-U-12	1.09841	31		HHV6A-pS22-C02-I-01	1.00698	31
HHV6A-pS22-A04-U-15	1.17714	32		HHV6A-pS22-A06-I-04	1.35911	32					HHV6A-pS22-B01-U-15	1.07601	32		HHV6A-pS22-B02-I-04	1.15666	32					HHV6A-pS22-C03-U-39	1.09487	32		HHV6A-pS22-C03-I-01	0.981571	32
HHV6A-pS22-A05-U-06	1.15219	33		HHV6A-pS22-A05-I-13	1.31608	33					HHV6A-pS22-B03-U-17	1.07161	33		HHV6A-pS22-B03-I-03	1.11633	33					HHV6A-pS22-C03-U-34	1.09207	33		HHV6A-pS22-C02-I-04	0.973669	33
HHV6A-pS22-A05-U-12	1.14871	34		HHV6A-pS22-A01-I-05	1.31176	34					HHV6A-pS22-B04-U-15	1.05882	34		HHV6A-pS22-B01-I-08	1.11553	34					HHV6A-pS22-C02-U-21	1.08482	34		HHV6A-pS22-C03-I-11	0.953382	34
HHV6A-pS22-A02-U-04	1.14571	35		HHV6A-pS22-A01-I-03	1.3009	35					HHV6A-pS22-B03-U-21	1.04477	35		HHV6A-pS22-B03-I-12	1.09636	35					HHV6A-pS22-C03-U-23	1.07992	35		HHV6A-pS22-C01-I-04	0.905503	35
HHV6A-pS22-A01-U-16	1.14517	36		HHV6A-pS22-A05-I-12	1.29351	36					HHV6A-pS22-B02-U-04	1.04348	36		HHV6A-pS22-B01-I-11	1.06431	36					HHV6A-pS22-C04-U-06	1.07896	36		HHV6A-pS22-C01-I-03	0.821597	36
HHV6A-pS22-A04-U-30	1.14381	37		HHV6A-pS22-A05-I-07	1.29277	37					HHV6A-pS22-B04-U-11	1.03912	37		HHV6A-pS22-B03-I-07	1.04198	37					HHV6A-pS22-C03-U-15	1.06622	37
HHV6A-pS22-A06-U-34	1.14261	38		HHV6A-pS22-A05-I-03	1.26643	38					HHV6A-pS22-B01-U-19	1.03163	38		HHV6A-pS22-B02-I-07	1.03877	38					HHV6A-pS22-C04-U-04	1.06207	38
HHV6A-pS22-A03-U-25	1.14034	39		HHV6A-pS22-A05-I-10	1.24564	39					HHV6A-pS22-B05-U-07	1.02896	39		HHV6A-pS22-B02-I-01	1.03275	39					HHV6A-pS22-C02-U-14	1.05513	39
HHV6A-pS22-A05-U-32	1.13828	40		HHV6A-pS22-A07-I-05	1.22317	40					HHV6A-pS22-B04-U-35	1.02691	40		HHV6A-pS22-B04-I-05	1.02868	40					HHV6A-pS22-C02-U-09	1.0295	40
HHV6A-pS22-A07-U-09	1.13084	41		HHV6A-pS22-A04-I-02	1.22248	41					HHV6A-pS22-B04-U-25	1.02594	41		HHV6A-pS22-B03-I-04	1.0191	41					HHV6A-pS22-C03-U-18	1.02938	41
HHV6A-pS22-A06-U-13	1.12372	42		HHV6A-pS22-A05-I-06	1.21737	42					HHV6A-pS22-B04-U-30	1.02269	42		HHV6A-pS22-B03-I-09	0.996483	42					HHV6A-pS22-C01-U-01	1.0285	42
HHV6A-pS22-A06-U-08	1.11383	43		HHV6A-pS22-A02-I-08	1.20637	43					HHV6A-pS22-B03-U-07	1.01807	43		HHV6A-pS22-B03-I-08	0.971529	43					HHV6A-pS22-C03-U-20	1.02572	43
HHV6A-pS22-A05-U-20	1.11334	44		HHV6A-pS22-A02-I-01	1.18541	44					HHV6A-pS22-B04-U-32	1.01772	44		HHV6A-pS22-B03-I-13	0.944177	44					HHV6A-pS22-C02-U-12	1.02559	44
HHV6A-pS22-A06-U-35	1.11172	45		HHV6A-pS22-A06-I-01	1.16965	45					HHV6A-pS22-B02-U-15	1.01403	45		HHV6A-pS22-B01-I-04	0.937204	45					HHV6A-pS22-C03-U-31	1.02495	45
HHV6A-pS22-A03-U-39	1.10902	46		HHV6A-pS22-A07-I-10	1.15105	46					HHV6A-pS22-B02-U-01	1.01318	46		HHV6A-pS22-B03-I-06	0.922204	46					HHV6A-pS22-C01-U-10	1.02201	46
HHV6A-pS22-A05-U-01	1.10831	47		HHV6A-pS22-A02-I-07	1.14734	47					HHV6A-pS22-B02-U-09	1.01193	47		HHV6A-pS22-B01-I-06	0.897883	47					HHV6A-pS22-C03-U-37	1.02035	47
HHV6A-pS22-A04-U-03	1.10412	48		HHV6A-pS22-A04-I-07	1.11122	48					HHV6A-pS22-B02-U-06	1.01063	48		HHV6A-pS22-B01-I-10	0.882628	48					HHV6A-pS22-C01-U-06	1.00718	48
HHV6A-pS22-A06-U-39	1.10359	49		HHV6A-pS22-A01-I-01	1.10442	49					HHV6A-pS22-B03-U-03	1.0088	49		HHV6A-pS22-B02-I-03	0.877762	49					HHV6A-pS22-C03-U-14	1.00361	49
HHV6A-pS22-A03-U-08	1.10325	50		HHV6A-pS22-A04-I-03	1.0995	50					HHV6A-pS22-B02-U-17	1.00864	50		HHV6A-pS22-B04-I-09	0.768477	50					HHV6A-pS22-C03-U-08	0.990993	50
HHV6A-pS22-A02-U-07	1.09734	51		HHV6A-pS22-A04-I-06	1.0992	51					HHV6A-pS22-B01-U-03	1.00276	51		HHV6A-pS22-B01-I-07	0.72863	51					HHV6A-pS22-C02-U-07	0.989769	51
HHV6A-pS22-A03-U-06	1.09285	52		HHV6A-pS22-A04-I-05	1.07832	52					HHV6A-pS22-B03-U-31	0.999076	52									HHV6A-pS22-C02-U-25	0.987923	52
HHV6A-pS22-A04-U-26	1.09198	53		HHV6A-pS22-A06-I-05	1.06754	53					HHV6A-pS22-B05-U-04	0.998222	53									HHV6A-pS22-C03-U-27	0.98601	53
HHV6A-pS22-A03-U-23	1.09145	54		HHV6A-pS22-A01-I-07	1.06248	54					HHV6A-pS22-B01-U-16	0.994214	54									HHV6A-pS22-C04-U-13	0.982088	54
HHV6A-pS22-A03-U-37	1.09101	55		HHV6A-pS22-A06-I-09	1.05976	55					HHV6A-pS22-B04-U-23	0.991363	55									HHV6A-pS22-C02-U-11	0.977805	55
HHV6A-pS22-A05-U-03	1.08996	56		HHV6A-pS22-A07-I-07	1.01587	56					HHV6A-pS22-B01-U-02	0.989742	56									HHV6A-pS22-C03-U-24	0.969267	56
HHV6A-pS22-A06-U-09	1.08825	57		HHV6A-pS22-A05-I-01	1.0139	57					HHV6A-pS22-B03-U-25	0.989548	57									HHV6A-pS22-C03-U-01	0.961792	57
HHV6A-pS22-A04-U-19	1.08178	58		HHV6A-pS22-A07-I-06	1.00933	58					HHV6A-pS22-B03-U-15	0.988381	58									HHV6A-pS22-C01-U-13	0.961517	58
HHV6A-pS22-A06-U-18	1.07924	59		HHV6A-pS22-A07-I-02	1.00431	59					HHV6A-pS22-B03-U-24	0.986307	59									HHV6A-pS22-C02-U-20	0.958086	59
HHV6A-pS22-A05-U-11	1.07213	60		HHV6A-pS22-A05-I-09	0.995106	60					HHV6A-pS22-B03-U-04	0.98527	60									HHV6A-pS22-C03-U-19	0.955173	60
HHV6A-pS22-A02-U-02	1.07114	61		HHV6A-pS22-A06-I-08	0.99399	61					HHV6A-pS22-B04-U-12	0.984773	61									HHV6A-pS22-C01-U-14	0.954332	61
HHV6A-pS22-A04-U-08	1.07067	62		HHV6A-pS22-A05-I-11	0.984007	62					HHV6A-pS22-B03-U-16	0.978983	62									HHV6A-pS22-C03-U-35	0.953771	62
HHV6A-pS22-A01-U-14	1.07009	63		HHV6A-pS22-A03-I-01	0.977121	63					HHV6A-pS22-B05-U-03	0.978547	63									HHV6A-pS22-C04-U-03	0.95299	63
HHV6A-pS22-A04-U-29	1.0697	64		HHV6A-pS22-A05-I-08	0.94568	64					HHV6A-pS22-B04-U-29	0.97722	64									HHV6A-pS22-C01-U-02	0.95016	64
HHV6A-pS22-A03-U-27	1.06951	65		HHV6A-pS22-A03-I-07	0.902231	65					HHV6A-pS22-B01-U-07	0.972514	65									HHV6A-pS22-C04-U-01	0.935531	65
HHV6A-pS22-A03-U-30	1.06304	66		HHV6A-pS22-A04-I-08	0.880016	66					HHV6A-pS22-B04-U-24	0.96241	66									HHV6A-pS22-C04-U-05	0.925028	66
HHV6A-pS22-A03-U-19	1.06279	67		HHV6A-pS22-A07-I-01	0.867615	67					HHV6A-pS22-B03-U-13	0.959668	67									HHV6A-pS22-C01-U-15	0.919796	67
HHV6A-pS22-A07-U-01	1.06078	68		HHV6A-pS22-A04-I-04	0.847177	68					HHV6A-pS22-B05-U-09	0.959267	68									HHV6A-pS22-C03-U-32	0.919352	68
HHV6A-pS22-A04-U-17	1.05483	69		HHV6A-pS22-A03-I-04	0.838057	69					HHV6A-pS22-B02-U-05	0.958038	69									HHV6A-pS22-C03-U-05	0.911564	69
HHV6A-pS22-A03-U-18	1.04516	70		HHV6A-pS22-A02-I-10	0.742305	70					HHV6A-pS22-B04-U-39	0.957745	70									HHV6A-pS22-C04-U-15	0.910266	70
HHV6A-pS22-A04-U-20	1.04396	71		HHV6A-pS22-A02-I-05	0.735438	71					HHV6A-pS22-B01-U-08	0.957325	71									HHV6A-pS22-C03-U-10	0.908528	71
HHV6A-pS22-A06-U-02	1.04203	72									HHV6A-pS22-B03-U-05	0.955908	72									HHV6A-pS22-C04-U-09	0.908066	72
HHV6A-pS22-A06-U-24	1.04188	73									HHV6A-pS22-B01-U-06	0.947988	73									HHV6A-pS22-C03-U-13	0.90113	73
HHV6A-pS22-A02-U-05	1.04168	74									HHV6A-pS22-B05-U-10	0.94773	74									HHV6A-pS22-C03-U-38	0.897314	74
HHV6A-pS22-A05-U-14	1.04091	75									HHV6A-pS22-B04-U-37	0.947526	75									HHV6A-pS22-C03-U-04	0.89638	75
HHV6A-pS22-A04-U-28	1.03923	76									HHV6A-pS22-B04-U-04	0.947452	76									HHV6A-pS22-C01-U-05	0.877998	76
HHV6A-pS22-A06-U-04	1.03861	77									HHV6A-pS22-B03-U-29	0.925834	77									HHV6A-pS22-C01-U-12	0.875757	77
HHV6A-pS22-A07-U-12	1.03687	78									HHV6A-pS22-B02-U-03	0.923431	78									HHV6A-pS22-C03-U-33	0.873174	78
HHV6A-pS22-A05-U-33	1.0358	79									HHV6A-pS22-B04-U-16	0.922053	79									HHV6A-pS22-C02-U-17	0.871236	79
HHV6A-pS22-A01-U-05	1.03576	80									HHV6A-pS22-B04-U-27	0.920572	80									HHV6A-pS22-C03-U-02	0.868735	80
HHV6A-pS22-A04-U-31	1.0328	81									HHV6A-pS22-B04-U-09	0.918129	81									HHV6A-pS22-C01-U-20	0.866331	81
HHV6A-pS22-A07-U-06	1.03205	82									HHV6A-pS22-B04-U-10	0.914649	82									HHV6A-pS22-C01-U-07	0.857678	82
HHV6A-pS22-A02-U-20	1.03066	83									HHV6A-pS22-B04-U-26	0.906503	83									HHV6A-pS22-C02-U-28	0.857647	83
HHV6A-pS22-A04-U-21	1.02915	84									HHV6A-pS22-B03-U-14	0.899842	84									HHV6A-pS22-C01-U-23	0.856674	84
HHV6A-pS22-A05-U-05	1.02862	85									HHV6A-pS22-B04-U-22	0.897765	85									HHV6A-pS22-C02-U-03	0.856539	85
HHV6A-pS22-A06-U-14	1.02807	86									HHV6A-pS22-B04-U-28	0.896581	86									HHV6A-pS22-C02-U-19	0.855431	86
HHV6A-pS22-A07-U-16	1.02485	87									HHV6A-pS22-B01-U-20	0.886113	87									HHV6A-pS22-C02-U-15	0.855136	87
HHV6A-pS22-A03-U-05	1.02462	88									HHV6A-pS22-B01-U-17	0.878814	88									HHV6A-pS22-C03-U-11	0.854251	88
HHV6A-pS22-A05-U-21	1.02167	89									HHV6A-pS22-B03-U-28	0.877546	89									HHV6A-pS22-C02-U-06	0.851739	89
HHV6A-pS22-A03-U-34	1.01967	90									HHV6A-pS22-B05-U-01	0.871321	90									HHV6A-pS22-C03-U-36	0.843972	90
HHV6A-pS22-A07-U-08	1.01924	91									HHV6A-pS22-B04-U-03	0.868442	91									HHV6A-pS22-C03-U-03	0.835873	91
HHV6A-pS22-A07-U-14	1.01013	92									HHV6A-pS22-B04-U-01	0.867924	92									HHV6A-pS22-C02-U-26	0.835565	92
HHV6A-pS22-A01-U-10	1.00826	93									HHV6A-pS22-B05-U-08	0.864683	93									HHV6A-pS22-C04-U-11	0.832979	93
HHV6A-pS22-A03-U-32	1.00775	94									HHV6A-pS22-B05-U-02	0.864446	94									HHV6A-pS22-C04-U-10	0.832198	94
HHV6A-pS22-A03-U-33	1.00528	95									HHV6A-pS22-B02-U-08	0.852913	95									HHV6A-pS22-C01-U-17	0.830173	95
HHV6A-pS22-A05-U-13	1.00428	96									HHV6A-pS22-B03-U-30	0.850517	96									HHV6A-pS22-C02-U-27	0.822641	96
HHV6A-pS22-A06-U-05	1.00358	97									HHV6A-pS22-B02-U-02	0.85002	97									HHV6A-pS22-C03-U-12	0.82209	97
HHV6A-pS22-A01-U-03	1.00114	98									HHV6A-pS22-B01-U-12	0.849027	98									HHV6A-pS22-C04-U-18	0.81552	98
HHV6A-pS22-A06-U-16	1.00075	99									HHV6A-pS22-B02-U-10	0.833738	99									HHV6A-pS22-C01-U-21	0.809467	99
HHV6A-pS22-A01-U-06	1.00058	100									HHV6A-pS22-B03-U-26	0.807285	100									HHV6A-pS22-C02-U-10	0.803439	100
HHV6A-pS22-A01-U-15	1.00009	101									HHV6A-pS22-B04-U-08	0.80128	101									HHV6A-pS22-C02-U-04	0.797531	101
HHV6A-pS22-A06-U-38	0.999804	102									HHV6A-pS22-B01-U-10	0.788269	102									HHV6A-pS22-C04-U-08	0.785642	102
HHV6A-pS22-A07-U-20	0.993484	103									HHV6A-pS22-B03-U-12	0.784405	103									HHV6A-pS22-C04-U-17	0.784081	103
HHV6A-pS22-A04-U-25	0.992309	104									HHV6A-pS22-B04-U-21	0.782398	104									HHV6A-pS22-C04-U-16	0.769674	104
HHV6A-pS22-A05-U-16	0.982675	105									HHV6A-pS22-B03-U-08	0.772608	105									HHV6A-pS22-C01-U-18	0.761101	105
HHV6A-pS22-A07-U-10	0.980276	106									HHV6A-pS22-B04-U-05	0.762627	106									HHV6A-pS22-C01-U-22	0.760869	106
HHV6A-pS22-A01-U-11	0.977879	107									HHV6A-pS22-B03-U-01	0.76146	107									HHV6A-pS22-C03-U-40	0.72732	107
HHV6A-pS22-A04-U-01	0.975374	108									HHV6A-pS22-B04-U-38	0.74604	108									HHV6A-pS22-C02-U-05	0.715407	108
HHV6A-pS22-A03-U-17	0.97433	109									HHV6A-pS22-B04-U-13	0.742634	109									HHV6A-pS22-C03-U-17	0.687528	109
HHV6A-pS22-A04-U-18	0.969668	110									HHV6A-pS22-B03-U-02	0.7402	110									HHV6A-pS22-C03-U-06	0.66954	110
HHV6A-pS22-A06-U-37	0.967027	111									HHV6A-pS22-B04-U-17	0.735377	111
HHV6A-pS22-A01-U-18	0.966247	112									HHV6A-pS22-B04-U-19	0.733674	112
HHV6A-pS22-A07-U-07	0.96555	113									HHV6A-pS22-B02-U-13	0.73162	113
HHV6A-pS22-A04-U-09	0.964934	114									HHV6A-pS22-B01-U-18	0.684508	114
HHV6A-pS22-A03-U-26	0.964184	115									HHV6A-pS22-B01-U-05	0.486586	115
HHV6A-pS22-A03-U-38	0.963867	116									HHV6A-pS22-B03-U-22	0.485667	116
HHV6A-pS22-A06-U-03	0.962012	117									HHV6A-pS22-B02-U-14	0.382546	117
HHV6A-pS22-A03-U-41	0.961267	118
HHV6A-pS22-A03-U-14	0.961014	119
HHV6A-pS22-A06-U-28	0.959905	120
HHV6A-pS22-A06-U-30	0.959323	121
HHV6A-pS22-A05-U-04	0.958554	122
HHV6A-pS22-A01-U-13	0.952359	123
HHV6A-pS22-A05-U-27	0.950193	124
HHV6A-pS22-A02-U-09	0.949883	125
HHV6A-pS22-A03-U-28	0.947697	126
HHV6A-pS22-A03-U-09	0.94719	127
HHV6A-pS22-A03-U-11	0.94459	128
HHV6A-pS22-A07-U-18	0.943031	129
HHV6A-pS22-A02-U-12	0.941811	130
HHV6A-pS22-A06-U-23	0.939773	131
HHV6A-pS22-A02-U-15	0.938437	132
HHV6A-pS22-A05-U-22	0.937837	133
HHV6A-pS22-A06-U-01	0.933596	134
HHV6A-pS22-A04-U-14	0.926208	135
HHV6A-pS22-A03-U-03	0.926137	136
HHV6A-pS22-A04-U-27	0.925115	137
HHV6A-pS22-A05-U-18	0.924814	138
HHV6A-pS22-A03-U-02	0.922396	139
HHV6A-pS22-A05-U-30	0.921263	140
HHV6A-pS22-A04-U-06	0.917042	141
HHV6A-pS22-A06-U-27	0.916372	142
HHV6A-pS22-A05-U-19	0.912828	143
HHV6A-pS22-A06-U-12	0.908523	144
HHV6A-pS22-A06-U-29	0.90627	145
HHV6A-pS22-A07-U-21	0.903077	146
HHV6A-pS22-A02-U-19	0.900126	147
HHV6A-pS22-A04-U-34	0.899622	148
HHV6A-pS22-A03-U-29	0.898045	149
HHV6A-pS22-A04-U-22	0.897922	150
HHV6A-pS22-A02-U-03	0.891814	151
HHV6A-pS22-A04-U-10	0.89167	152
HHV6A-pS22-A02-U-06	0.891573	153
HHV6A-pS22-A06-U-11	0.891008	154
HHV6A-pS22-A01-U-17	0.884328	155
HHV6A-pS22-A06-U-07	0.882214	156
HHV6A-pS22-A02-U-17	0.880911	157
HHV6A-pS22-A03-U-16	0.880226	158
HHV6A-pS22-A07-U-02	0.876926	159
HHV6A-pS22-A06-U-33	0.876037	160
HHV6A-pS22-A05-U-28	0.875758	161
HHV6A-pS22-A03-U-40	0.874836	162
HHV6A-pS22-A03-U-07	0.868939	163
HHV6A-pS22-A06-U-25	0.866371	164
HHV6A-pS22-A01-U-01	0.864589	165
HHV6A-pS22-A02-U-10	0.861394	166
HHV6A-pS22-A05-U-07	0.856446	167
HHV6A-pS22-A04-U-12	0.855554	168
HHV6A-pS22-A05-U-34	0.854005	169
HHV6A-pS22-A07-U-19	0.852162	170
HHV6A-pS22-A02-U-08	0.850852	171
HHV6A-pS22-A06-U-31	0.84871	172
HHV6A-pS22-A04-U-33	0.8439	173
HHV6A-pS22-A07-U-04	0.842124	174
HHV6A-pS22-A06-U-06	0.835047	175
HHV6A-pS22-A07-U-17	0.833671	176
HHV6A-pS22-A05-U-15	0.832103	177
HHV6A-pS22-A01-U-08	0.827507	178
HHV6A-pS22-A04-U-02	0.825569	179
HHV6A-pS22-A03-U-04	0.821634	180
HHV6A-pS22-A02-U-13	0.817601	181
HHV6A-pS22-A05-U-29	0.814198	182
HHV6A-pS22-A06-U-20	0.812736	183
HHV6A-pS22-A03-U-01	0.809966	184
HHV6A-pS22-A03-U-10	0.808444	185
HHV6A-pS22-A05-U-25	0.80665	186
HHV6A-pS22-A03-U-15	0.806351	187
HHV6A-pS22-A03-U-21	0.798678	188
HHV6A-pS22-A06-U-10	0.786572	189
HHV6A-pS22-A06-U-36	0.784901	190
HHV6A-pS22-A01-U-02	0.78126	191
HHV6A-pS22-A01-U-12	0.776184	192
HHV6A-pS22-A05-U-31	0.773281	193
HHV6A-pS22-A06-U-40	0.770947	194
HHV6A-pS22-A04-U-32	0.768269	195
HHV6A-pS22-A04-U-04	0.765841	196
HHV6A-pS22-A07-U-15	0.754491	197
HHV6A-pS22-A05-U-02	0.747902	198
HHV6A-pS22-A06-U-17	0.733228	199
HHV6A-pS22-A07-U-03	0.730849	200
HHV6A-pS22-A04-U-11	0.726629	201
HHV6A-pS22-A03-U-12	0.710662	202
HHV6A-pS22-A07-U-05	0.70199	203
HHV6A-pS22-A05-U-26	0.693666	204
HHV6A-pS22-A04-U-16	0.683593	205
HHV6A-pS22-A05-U-24	0.67576	206
HHV6A-pS22-A02-U-16	0.608999	207
HHV6A-pS22-A03-U-36	0.560502	208

## Sheet: RhCMV
RhCMV-pS22-A											RhCMV-pS22-B											RhCMV-pS22-C
Uninfected				Infected							Uninfected				Infected
#	pS22	n=		#	pS22	n=					#	pS22	n=		#	pS22	n=					#	pS22	n=		#	pS22	n=
RhCMV-pS22-A04-U-09	2.7479	1		RhCMV-pS22-A03-I-09	2.57541	1		Uninfected (RhCMV-pS22-A)			RhCMV-pS22-B03-U-13	1.38367	1		RhCMV-pS22-B01-I-01	2.74787	1		Uninfected (RhCMV-pS22-B)			RhCMV-pS22-C02-U-26	2.39531	1		RhCMV-pS22-C02-I-11	2.48883	1		Uninfected (RhCMV-pS22-C)
RhCMV-pS22-A04-U-07	1.88199	2		RhCMV-pS22-A04-I-06	2.42795	2		Mean	1		RhCMV-pS22-B01-U-21	1.37788	2		RhCMV-pS22-B03-I-21	2.47764	2		Mean	1		RhCMV-pS22-C05-U-10	1.9013	2		RhCMV-pS22-C02-I-09	2.10413	2		Mean	1
RhCMV-pS22-A02-U-17	1.75492	3		RhCMV-pS22-A05-I-09	2.28123	3		SD	0.233748		RhCMV-pS22-B01-U-12	1.33667	3		RhCMV-pS22-B03-I-13	2.38873	3		SD	0.157275		RhCMV-pS22-C06-U-19	1.82806	3		RhCMV-pS22-C04-I-03	2.09352	3		SD	0.200894
RhCMV-pS22-A01-U-12	1.69183	4		RhCMV-pS22-A01-I-07	2.18292	4		n=	235		RhCMV-pS22-B02-U-02	1.32109	4		RhCMV-pS22-B02-I-02	2.23276	4		n=	92		RhCMV-pS22-C03-U-01	1.67961	4		RhCMV-pS22-C02-I-10	2.06125	4		n=	273
RhCMV-pS22-A04-U-08	1.6387	5		RhCMV-pS22-A04-I-05	2.17516	5		Increased	0.131915		RhCMV-pS22-B03-U-04	1.30613	5		RhCMV-pS22-B01-I-11	2.06025	5		Increased	0.163043		RhCMV-pS22-C06-U-16	1.67115	5		RhCMV-pS22-C02-I-04	2.0479	5		Increased	0.10989
RhCMV-pS22-A02-U-11	1.62781	6		RhCMV-pS22-A02-I-17	2.0945	6					RhCMV-pS22-B03-U-18	1.29542	6		RhCMV-pS22-B01-I-14	2.0517	6					RhCMV-pS22-C01-U-50	1.66612	6		RhCMV-pS22-C02-I-02	2.02081	6
RhCMV-pS22-A03-U-30	1.56336	7		RhCMV-pS22-A04-I-07	2.07038	7					RhCMV-pS22-B01-U-09	1.28976	7		RhCMV-pS22-B01-I-15	2.03095	7					RhCMV-pS22-C06-U-08	1.5765	7		RhCMV-pS22-C02-I-03	2.01736	7
RhCMV-pS22-A02-U-30	1.54162	8		RhCMV-pS22-A04-I-10	2.06305	8		Infected (RhCMV-pS22-A)			RhCMV-pS22-B03-U-14	1.27276	8		RhCMV-pS22-B03-I-06	1.98779	8		Infected (RhCMV-pS22-B)			RhCMV-pS22-C03-U-33	1.52386	8		RhCMV-pS22-C05-I-05	1.97867	8		Infected (RhCMV-pS22-C)
RhCMV-pS22-A04-U-24	1.54148	9		RhCMV-pS22-A05-I-08	2.04574	9		mean	1.50695		RhCMV-pS22-B02-U-21	1.23585	9		RhCMV-pS22-B03-I-15	1.97576	9		mean	1.56024		RhCMV-pS22-C05-U-14	1.44453	9		RhCMV-pS22-C06-I-12	1.91823	9		mean	1.54004
RhCMV-pS22-A05-U-20	1.52581	10		RhCMV-pS22-A01-I-09	1.98768	10		SD	0.348993		RhCMV-pS22-B01-U-16	1.22896	10		RhCMV-pS22-B02-I-09	1.96573	10		SD	0.388466		RhCMV-pS22-C03-U-35	1.43709	10		RhCMV-pS22-C06-I-16	1.90597	10		SD	0.273464
RhCMV-pS22-A01-U-31	1.47411	11		RhCMV-pS22-A02-I-09	1.98379	11		n=	94		RhCMV-pS22-B03-U-20	1.22456	11		RhCMV-pS22-B01-I-07	1.96379	11		n=	64		RhCMV-pS22-C03-U-21	1.41598	11		RhCMV-pS22-C01-I-09	1.90207	11		n=	84
RhCMV-pS22-A05-U-22	1.42088	12		RhCMV-pS22-A03-I-07	1.96184	12		Increased	0.776596		RhCMV-pS22-B02-U-11	1.2173	12		RhCMV-pS22-B03-I-18	1.93646	12		Increased	0.875		RhCMV-pS22-C03-U-52	1.415	12		RhCMV-pS22-C02-I-05	1.87475	12		Increased	0.916667
RhCMV-pS22-A03-U-38	1.41183	13		RhCMV-pS22-A05-I-05	1.92973	13					RhCMV-pS22-B02-U-18	1.21445	13		RhCMV-pS22-B02-I-06	1.82792	13					RhCMV-pS22-C03-U-11	1.39532	13		RhCMV-pS22-C04-I-05	1.82983	13
RhCMV-pS22-A04-U-15	1.35061	14		RhCMV-pS22-A02-I-12	1.91269	14					RhCMV-pS22-B02-U-25	1.1963	14		RhCMV-pS22-B02-I-11	1.81987	14					RhCMV-pS22-C01-U-46	1.39237	14		RhCMV-pS22-C05-I-04	1.82357	14
RhCMV-pS22-A01-U-17	1.34845	15		RhCMV-pS22-A04-I-09	1.88812	15					RhCMV-pS22-B02-U-05	1.19377	15		RhCMV-pS22-B03-I-12	1.81007	15					RhCMV-pS22-C05-U-19	1.39051	15		RhCMV-pS22-C04-I-02	1.79202	15
RhCMV-pS22-A05-U-46	1.3429	16		RhCMV-pS22-A04-I-04	1.86247	16					RhCMV-pS22-B02-U-01	1.15155	16		RhCMV-pS22-B01-I-09	1.78198	16					RhCMV-pS22-C05-U-13	1.3858	16		RhCMV-pS22-C02-I-08	1.77918	16
RhCMV-pS22-A05-U-02	1.33748	17		RhCMV-pS22-A05-I-15	1.85595	17					RhCMV-pS22-B03-U-02	1.14538	17		RhCMV-pS22-B03-I-20	1.76121	17					RhCMV-pS22-C05-U-26	1.37892	17		RhCMV-pS22-C03-I-03	1.74806	17
RhCMV-pS22-A01-U-11	1.32512	18		RhCMV-pS22-A04-I-02	1.81296	18					RhCMV-pS22-B03-U-09	1.14489	18		RhCMV-pS22-B03-I-01	1.7364	18					RhCMV-pS22-C02-U-05	1.35828	18		RhCMV-pS22-C02-I-14	1.7389	18
RhCMV-pS22-A02-U-29	1.31765	19		RhCMV-pS22-A03-I-11	1.8056	19					RhCMV-pS22-B01-U-03	1.14251	19		RhCMV-pS22-B02-I-04	1.6946	19					RhCMV-pS22-C03-U-56	1.31315	19		RhCMV-pS22-C03-I-07	1.73773	19
RhCMV-pS22-A03-U-23	1.30715	20		RhCMV-pS22-A05-I-12	1.799	20					RhCMV-pS22-B02-U-30	1.13694	20		RhCMV-pS22-B01-I-08	1.68779	20					RhCMV-pS22-C02-U-29	1.30999	20		RhCMV-pS22-C02-I-12	1.72555	20
RhCMV-pS22-A01-U-05	1.30195	21		RhCMV-pS22-A02-I-13	1.79142	21					RhCMV-pS22-B03-U-26	1.13022	21		RhCMV-pS22-B01-I-10	1.67814	21					RhCMV-pS22-C05-U-12	1.29501	21		RhCMV-pS22-C03-I-11	1.71383	21
RhCMV-pS22-A05-U-34	1.29226	22		RhCMV-pS22-A03-I-08	1.78813	22					RhCMV-pS22-B02-U-08	1.10995	22		RhCMV-pS22-B01-I-16	1.66053	22					RhCMV-pS22-C03-U-40	1.28858	22		RhCMV-pS22-C04-I-09	1.68187	22
RhCMV-pS22-A03-U-14	1.29225	23		RhCMV-pS22-A05-I-17	1.74156	23					RhCMV-pS22-B01-U-04	1.09311	23		RhCMV-pS22-B03-I-09	1.64231	23					RhCMV-pS22-C03-U-20	1.27358	23		RhCMV-pS22-C01-I-02	1.66995	23
RhCMV-pS22-A04-U-16	1.28592	24		RhCMV-pS22-A05-I-10	1.72433	24					RhCMV-pS22-B03-U-22	1.09067	24		RhCMV-pS22-B01-I-02	1.63145	24					RhCMV-pS22-C04-U-14	1.26944	24		RhCMV-pS22-C01-I-08	1.65241	24
RhCMV-pS22-A03-U-11	1.28291	25		RhCMV-pS22-A05-I-04	1.70767	25					RhCMV-pS22-B03-U-08	1.08597	25		RhCMV-pS22-B03-I-03	1.62097	25					RhCMV-pS22-C06-U-21	1.26661	25		RhCMV-pS22-C05-I-12	1.64878	25
RhCMV-pS22-A01-U-26	1.27221	26		RhCMV-pS22-A05-I-03	1.70516	26					RhCMV-pS22-B02-U-28	1.08493	26		RhCMV-pS22-B02-I-07	1.61717	26					RhCMV-pS22-C05-U-42	1.23419	26		RhCMV-pS22-C06-I-11	1.62461	26
RhCMV-pS22-A06-U-13	1.26598	27		RhCMV-pS22-A05-I-01	1.69852	27					RhCMV-pS22-B01-U-19	1.0774	27		RhCMV-pS22-B03-I-10	1.59081	27					RhCMV-pS22-C04-U-20	1.22691	27		RhCMV-pS22-C04-I-04	1.62431	27
RhCMV-pS22-A05-U-14	1.26532	28		RhCMV-pS22-A05-I-13	1.67725	28					RhCMV-pS22-B01-U-25	1.06089	28		RhCMV-pS22-B01-I-18	1.58081	28					RhCMV-pS22-C06-U-22	1.22392	28		RhCMV-pS22-C05-I-10	1.62386	28
RhCMV-pS22-A05-U-07	1.25399	29		RhCMV-pS22-A05-I-19	1.64012	29					RhCMV-pS22-B02-U-26	1.06062	29		RhCMV-pS22-B01-I-05	1.56766	29					RhCMV-pS22-C01-U-43	1.20971	29		RhCMV-pS22-C01-I-10	1.61198	29
RhCMV-pS22-A06-U-20	1.25109	30		RhCMV-pS22-A01-I-11	1.61156	30					RhCMV-pS22-B03-U-10	1.05829	30		RhCMV-pS22-B02-I-01	1.5616	30					RhCMV-pS22-C03-U-27	1.2046	30		RhCMV-pS22-C04-I-14	1.59805	30
RhCMV-pS22-A01-U-07	1.24468	31		RhCMV-pS22-A01-I-10	1.60079	31					RhCMV-pS22-B02-U-07	1.05083	31		RhCMV-pS22-B02-I-15	1.56136	31					RhCMV-pS22-C03-U-48	1.19615	31		RhCMV-pS22-C06-I-05	1.58625	31
RhCMV-pS22-A05-U-28	1.22916	32		RhCMV-pS22-A03-I-01	1.60019	32					RhCMV-pS22-B03-U-15	1.04609	32		RhCMV-pS22-B02-I-16	1.54873	32					RhCMV-pS22-C04-U-26	1.16501	32		RhCMV-pS22-C05-I-08	1.57393	32
RhCMV-pS22-A04-U-28	1.22026	33		RhCMV-pS22-A06-I-09	1.57268	33					RhCMV-pS22-B02-U-22	1.02502	33		RhCMV-pS22-B02-I-23	1.54352	33					RhCMV-pS22-C06-U-11	1.16087	33		RhCMV-pS22-C06-I-06	1.56565	33
RhCMV-pS22-A05-U-27	1.21694	34		RhCMV-pS22-A04-I-08	1.55299	34					RhCMV-pS22-B03-U-07	1.0236	34		RhCMV-pS22-B02-I-14	1.50058	34					RhCMV-pS22-C01-U-41	1.16085	34		RhCMV-pS22-C01-I-04	1.5587	34
RhCMV-pS22-A02-U-14	1.20761	35		RhCMV-pS22-A01-I-12	1.54839	35					RhCMV-pS22-B01-U-10	1.02355	35		RhCMV-pS22-B02-I-10	1.50027	35					RhCMV-pS22-C04-U-10	1.15982	35		RhCMV-pS22-C03-I-10	1.55152	35
RhCMV-pS22-A01-U-13	1.20399	36		RhCMV-pS22-A01-I-14	1.53583	36					RhCMV-pS22-B02-U-04	1.02068	36		RhCMV-pS22-B02-I-12	1.47146	36					RhCMV-pS22-C01-U-06	1.15319	36		RhCMV-pS22-C05-I-03	1.53698	36
RhCMV-pS22-A05-U-30	1.19882	37		RhCMV-pS22-A02-I-10	1.53322	37					RhCMV-pS22-B02-U-16	1.0112	37		RhCMV-pS22-B03-I-08	1.46549	37					RhCMV-pS22-C04-U-03	1.15316	37		RhCMV-pS22-C01-I-07	1.52763	37
RhCMV-pS22-A04-U-18	1.19229	38		RhCMV-pS22-A02-I-14	1.52445	38					RhCMV-pS22-B01-U-15	1.00908	38		RhCMV-pS22-B03-I-11	1.44769	38					RhCMV-pS22-C03-U-25	1.15198	38		RhCMV-pS22-C04-I-12	1.52601	38
RhCMV-pS22-A05-U-24	1.18863	39		RhCMV-pS22-A06-I-08	1.50377	39					RhCMV-pS22-B03-U-24	1.00885	39		RhCMV-pS22-B03-I-14	1.43714	39					RhCMV-pS22-C02-U-01	1.14932	39		RhCMV-pS22-C03-I-09	1.51632	39
RhCMV-pS22-A04-U-14	1.18458	40		RhCMV-pS22-A06-I-15	1.49308	40					RhCMV-pS22-B02-U-14	1.00876	40		RhCMV-pS22-B03-I-05	1.43475	40					RhCMV-pS22-C04-U-19	1.14844	40		RhCMV-pS22-C04-I-13	1.51384	40
RhCMV-pS22-A02-U-25	1.17828	41		RhCMV-pS22-A03-I-06	1.48789	41					RhCMV-pS22-B02-U-23	0.993207	41		RhCMV-pS22-B01-I-17	1.41384	41					RhCMV-pS22-C01-U-05	1.13642	41		RhCMV-pS22-C03-I-05	1.50976	41
RhCMV-pS22-A05-U-16	1.15748	42		RhCMV-pS22-A01-I-03	1.48633	42					RhCMV-pS22-B02-U-19	0.985156	42		RhCMV-pS22-B03-I-07	1.40435	42					RhCMV-pS22-C01-U-30	1.13148	42		RhCMV-pS22-C01-I-03	1.49613	42
RhCMV-pS22-A04-U-03	1.15212	43		RhCMV-pS22-A03-I-05	1.48018	43					RhCMV-pS22-B03-U-17	0.982979	43		RhCMV-pS22-B02-I-19	1.38968	43					RhCMV-pS22-C04-U-24	1.12287	43		RhCMV-pS22-C05-I-13	1.47259	43
RhCMV-pS22-A05-U-36	1.1451	44		RhCMV-pS22-A05-I-20	1.46886	44					RhCMV-pS22-B01-U-13	0.98248	44		RhCMV-pS22-B02-I-18	1.38834	44					RhCMV-pS22-C05-U-43	1.11856	44		RhCMV-pS22-C01-I-05	1.46702	44
RhCMV-pS22-A02-U-26	1.14273	45		RhCMV-pS22-A02-I-19	1.46439	45					RhCMV-pS22-B01-U-20	0.976195	45		RhCMV-pS22-B02-I-21	1.38747	45					RhCMV-pS22-C02-U-18	1.11783	45		RhCMV-pS22-C03-I-02	1.46212	45
RhCMV-pS22-A02-U-21	1.13745	46		RhCMV-pS22-A05-I-16	1.46012	46					RhCMV-pS22-B03-U-05	0.966995	46		RhCMV-pS22-B02-I-20	1.38676	46					RhCMV-pS22-C05-U-23	1.11499	46		RhCMV-pS22-C05-I-11	1.45778	46
RhCMV-pS22-A05-U-04	1.12723	47		RhCMV-pS22-A02-I-03	1.45703	47					RhCMV-pS22-B02-U-27	0.962818	47		RhCMV-pS22-B02-I-05	1.38329	47					RhCMV-pS22-C01-U-18	1.11072	47		RhCMV-pS22-C03-I-04	1.45209	47
RhCMV-pS22-A03-U-18	1.1253	48		RhCMV-pS22-A05-I-06	1.45446	48					RhCMV-pS22-B01-U-23	0.959681	48		RhCMV-pS22-B02-I-17	1.37153	48					RhCMV-pS22-C01-U-24	1.10586	48		RhCMV-pS22-C03-I-06	1.44998	48
RhCMV-pS22-A03-U-15	1.12239	49		RhCMV-pS22-A01-I-05	1.44385	49					RhCMV-pS22-B03-U-31	0.959414	49		RhCMV-pS22-B03-I-17	1.36562	49					RhCMV-pS22-C02-U-06	1.10315	49		RhCMV-pS22-C05-I-06	1.44985	49
RhCMV-pS22-A06-U-26	1.11401	50		RhCMV-pS22-A01-I-13	1.44197	50					RhCMV-pS22-B03-U-32	0.950433	50		RhCMV-pS22-B02-I-08	1.36008	50					RhCMV-pS22-C05-U-08	1.10261	50		RhCMV-pS22-C01-I-06	1.44694	50
RhCMV-pS22-A03-U-22	1.11305	51		RhCMV-pS22-A05-I-18	1.44119	51					RhCMV-pS22-B03-U-12	0.950104	51		RhCMV-pS22-B02-I-03	1.3574	51					RhCMV-pS22-C06-U-09	1.09846	51		RhCMV-pS22-C05-I-07	1.44427	51
RhCMV-pS22-A05-U-11	1.11194	52		RhCMV-pS22-A06-I-14	1.43697	52					RhCMV-pS22-B03-U-19	0.949197	52		RhCMV-pS22-B03-I-02	1.33555	52					RhCMV-pS22-C05-U-22	1.09068	52		RhCMV-pS22-C03-I-01	1.43588	52
RhCMV-pS22-A06-U-08	1.11035	53		RhCMV-pS22-A02-I-18	1.40743	53					RhCMV-pS22-B03-U-06	0.947714	53		RhCMV-pS22-B01-I-12	1.26893	53					RhCMV-pS22-C04-U-07	1.08987	53		RhCMV-pS22-C05-I-15	1.43312	53
RhCMV-pS22-A06-U-03	1.09335	54		RhCMV-pS22-A05-I-07	1.40349	54					RhCMV-pS22-B03-U-16	0.927774	54		RhCMV-pS22-B01-I-04	1.21032	54					RhCMV-pS22-C05-U-51	1.08667	54		RhCMV-pS22-C02-I-07	1.42487	54
RhCMV-pS22-A03-U-28	1.08829	55		RhCMV-pS22-A02-I-05	1.39536	55					RhCMV-pS22-B01-U-24	0.923217	55		RhCMV-pS22-B03-I-04	1.1846	55					RhCMV-pS22-C01-U-07	1.08101	55		RhCMV-pS22-C02-I-06	1.41309	55
RhCMV-pS22-A05-U-43	1.08419	56		RhCMV-pS22-A05-I-02	1.37906	56					RhCMV-pS22-B01-U-17	0.920951	56		RhCMV-pS22-B03-I-16	1.18073	56					RhCMV-pS22-C01-U-32	1.0799	56		RhCMV-pS22-C05-I-02	1.41229	56
RhCMV-pS22-A03-U-16	1.08204	57		RhCMV-pS22-A06-I-17	1.36358	57					RhCMV-pS22-B02-U-17	0.920352	57		RhCMV-pS22-B03-I-19	1.10583	57					RhCMV-pS22-C03-U-51	1.079	57		RhCMV-pS22-C06-I-07	1.41023	57
RhCMV-pS22-A02-U-09	1.0819	58		RhCMV-pS22-A06-I-04	1.3475	58					RhCMV-pS22-B02-U-10	0.919563	58		RhCMV-pS22-B01-I-03	1.03122	58					RhCMV-pS22-C03-U-38	1.07561	58		RhCMV-pS22-C05-I-14	1.39548	58
RhCMV-pS22-A02-U-33	1.0753	59		RhCMV-pS22-A01-I-04	1.33931	59					RhCMV-pS22-B02-U-13	0.917905	59		RhCMV-pS22-B02-I-22	0.962344	59					RhCMV-pS22-C02-U-15	1.07283	59		RhCMV-pS22-C06-I-03	1.3953	59
RhCMV-pS22-A02-U-19	1.07408	60		RhCMV-pS22-A01-I-08	1.33649	60					RhCMV-pS22-B03-U-03	0.914591	60		RhCMV-pS22-B01-I-06	0.952446	60					RhCMV-pS22-C05-U-30	1.07273	60		RhCMV-pS22-C06-I-10	1.39443	60
RhCMV-pS22-A03-U-13	1.06928	61		RhCMV-pS22-A02-I-11	1.33161	61					RhCMV-pS22-B03-U-28	0.913108	61		RhCMV-pS22-B01-I-19	0.888945	61					RhCMV-pS22-C04-U-13	1.06779	61		RhCMV-pS22-C05-I-01	1.38903	61
RhCMV-pS22-A06-U-04	1.06155	62		RhCMV-pS22-A02-I-08	1.32407	62					RhCMV-pS22-B02-U-15	0.912143	62		RhCMV-pS22-B02-I-13	0.864231	62					RhCMV-pS22-C04-U-34	1.06524	62		RhCMV-pS22-C06-I-09	1.38673	62
RhCMV-pS22-A01-U-20	1.05628	63		RhCMV-pS22-A01-I-01	1.3111	63					RhCMV-pS22-B01-U-02	0.911379	63		RhCMV-pS22-B01-I-13	0.86315	63					RhCMV-pS22-C02-U-21	1.0609	63		RhCMV-pS22-C06-I-02	1.35929	63
RhCMV-pS22-A04-U-25	1.04989	64		RhCMV-pS22-A06-I-03	1.30738	64					RhCMV-pS22-B01-U-14	0.910283	64		RhCMV-pS22-B02-I-24	0.796744	64					RhCMV-pS22-C03-U-06	1.06068	64		RhCMV-pS22-C04-I-08	1.34295	64
RhCMV-pS22-A01-U-08	1.04919	65		RhCMV-pS22-A04-I-01	1.30208	65					RhCMV-pS22-B03-U-27	0.902644	65									RhCMV-pS22-C06-U-27	1.05726	65		RhCMV-pS22-C05-I-17	1.3357	65
RhCMV-pS22-A05-U-40	1.04584	66		RhCMV-pS22-A02-I-02	1.30021	66					RhCMV-pS22-B03-U-21	0.899348	66									RhCMV-pS22-C04-U-11	1.05679	66		RhCMV-pS22-C06-I-13	1.31771	66
RhCMV-pS22-A06-U-15	1.04528	67		RhCMV-pS22-A02-I-16	1.29663	67					RhCMV-pS22-B03-U-23	0.886494	67									RhCMV-pS22-C04-U-05	1.05021	67		RhCMV-pS22-C06-I-04	1.3023	67
RhCMV-pS22-A05-U-49	1.03735	68		RhCMV-pS22-A06-I-06	1.29066	68					RhCMV-pS22-B01-U-01	0.884049	68									RhCMV-pS22-C01-U-44	1.0502	68		RhCMV-pS22-C04-I-11	1.30035	68
RhCMV-pS22-A01-U-23	1.035	69		RhCMV-pS22-A06-I-13	1.28499	69					RhCMV-pS22-B02-U-03	0.883491	69									RhCMV-pS22-C01-U-11	1.04586	69		RhCMV-pS22-C04-I-01	1.29609	69
RhCMV-pS22-A03-U-10	1.02619	70		RhCMV-pS22-A06-I-01	1.28444	70					RhCMV-pS22-B01-U-05	0.883245	70									RhCMV-pS22-C01-U-04	1.04509	70		RhCMV-pS22-C03-I-08	1.29446	70
RhCMV-pS22-A03-U-09	1.02345	71		RhCMV-pS22-A06-I-05	1.28207	71					RhCMV-pS22-B03-U-01	0.882127	71									RhCMV-pS22-C05-U-47	1.04388	71		RhCMV-pS22-C02-I-01	1.28572	71
RhCMV-pS22-A03-U-35	1.02225	72		RhCMV-pS22-A02-I-01	1.25249	72					RhCMV-pS22-B01-U-06	0.877692	72									RhCMV-pS22-C01-U-29	1.04032	72		RhCMV-pS22-C01-I-01	1.28266	72
RhCMV-pS22-A06-U-12	1.01805	73		RhCMV-pS22-A01-I-06	1.25049	73					RhCMV-pS22-B03-U-11	0.87191	73									RhCMV-pS22-C06-U-02	1.04012	73		RhCMV-pS22-C01-I-11	1.28078	73
RhCMV-pS22-A06-U-14	1.01622	74		RhCMV-pS22-A06-I-02	1.22632	74					RhCMV-pS22-B01-U-11	0.863442	74									RhCMV-pS22-C03-U-53	1.03837	74		RhCMV-pS22-C05-I-16	1.27322	74
RhCMV-pS22-A05-U-09	1.01535	75		RhCMV-pS22-A06-I-16	1.20485	75					RhCMV-pS22-B01-U-22	0.8603	75									RhCMV-pS22-C02-U-04	1.03836	75		RhCMV-pS22-C06-I-14	1.22227	75
RhCMV-pS22-A03-U-31	1.0148	76		RhCMV-pS22-A03-I-04	1.19331	76					RhCMV-pS22-B02-U-06	0.853891	76									RhCMV-pS22-C04-U-09	1.03828	76		RhCMV-pS22-C04-I-07	1.21963	76
RhCMV-pS22-A06-U-17	1.01467	77		RhCMV-pS22-A06-I-12	1.19223	77					RhCMV-pS22-B03-U-33	0.853124	77									RhCMV-pS22-C02-U-31	1.03671	77		RhCMV-pS22-C04-I-10	1.21947	77
RhCMV-pS22-A06-U-22	1.01202	78		RhCMV-pS22-A04-I-03	1.18241	78					RhCMV-pS22-B02-U-29	0.843235	78									RhCMV-pS22-C03-U-15	1.03528	78		RhCMV-pS22-C06-I-08	1.19468	78
RhCMV-pS22-A02-U-13	1.00514	79		RhCMV-pS22-A05-I-11	1.18013	79					RhCMV-pS22-B03-U-34	0.835986	79									RhCMV-pS22-C01-U-42	1.03479	79		RhCMV-pS22-C06-I-15	1.18689	79
RhCMV-pS22-A03-U-34	1.00452	80		RhCMV-pS22-A06-I-11	1.16975	80					RhCMV-pS22-B02-U-24	0.834553	80									RhCMV-pS22-C02-U-30	1.03294	80		RhCMV-pS22-C04-I-06	1.17191	80
RhCMV-pS22-A06-U-02	1.00224	81		RhCMV-pS22-A03-I-10	1.14723	81					RhCMV-pS22-B01-U-08	0.826613	81									RhCMV-pS22-C05-U-33	1.02916	81		RhCMV-pS22-C06-I-01	1.16268	81
RhCMV-pS22-A02-U-08	1.00118	82		RhCMV-pS22-A02-I-06	1.13273	82					RhCMV-pS22-B02-U-09	0.824607	82									RhCMV-pS22-C06-U-31	1.02841	82		RhCMV-pS22-C02-I-13	1.12129	82
RhCMV-pS22-A06-U-18	0.994107	83		RhCMV-pS22-A03-I-12	1.12179	83					RhCMV-pS22-B01-U-07	0.822813	83									RhCMV-pS22-C03-U-44	1.02586	83		RhCMV-pS22-C05-I-09	1.06087	83
RhCMV-pS22-A06-U-11	0.993559	84		RhCMV-pS22-A06-I-10	1.11821	84					RhCMV-pS22-B02-U-12	0.815135	84									RhCMV-pS22-C05-U-27	1.02454	84		RhCMV-pS22-C01-I-12	1.03836	84
RhCMV-pS22-A05-U-05	0.991319	85		RhCMV-pS22-A01-I-02	1.08586	85					RhCMV-pS22-B03-U-35	0.813409	85									RhCMV-pS22-C01-U-25	1.02236	85
RhCMV-pS22-A06-U-21	0.990269	86		RhCMV-pS22-A06-I-07	1.06786	86					RhCMV-pS22-B02-U-31	0.799428	86									RhCMV-pS22-C04-U-15	1.02124	86
RhCMV-pS22-A01-U-27	0.987727	87		RhCMV-pS22-A05-I-14	1.05555	87					RhCMV-pS22-B03-U-30	0.796353	87									RhCMV-pS22-C03-U-32	1.02096	87
RhCMV-pS22-A01-U-06	0.98388	88		RhCMV-pS22-A06-I-19	1.05342	88					RhCMV-pS22-B03-U-29	0.795859	88									RhCMV-pS22-C04-U-36	1.01976	88
RhCMV-pS22-A04-U-21	0.98355	89		RhCMV-pS22-A02-I-15	1.05324	89					RhCMV-pS22-B03-U-25	0.783912	89									RhCMV-pS22-C01-U-08	1.01683	89
RhCMV-pS22-A06-U-07	0.980582	90		RhCMV-pS22-A03-I-03	1.04332	90					RhCMV-pS22-B02-U-20	0.758462	90									RhCMV-pS22-C03-U-13	1.01553	90
RhCMV-pS22-A05-U-03	0.978375	91		RhCMV-pS22-A02-I-07	1.00401	91					RhCMV-pS22-B01-U-18	0.75785	91									RhCMV-pS22-C01-U-37	1.01521	91
RhCMV-pS22-A06-U-19	0.972631	92		RhCMV-pS22-A06-I-18	0.969981	92					RhCMV-pS22-B02-U-32	0.736834	92									RhCMV-pS22-C05-U-25	1.01426	92
RhCMV-pS22-A03-U-37	0.971627	93		RhCMV-pS22-A02-I-04	0.937248	93																RhCMV-pS22-C05-U-01	1.01417	93
RhCMV-pS22-A02-U-24	0.971479	94		RhCMV-pS22-A03-I-02	0.933252	94																RhCMV-pS22-C05-U-21	1.01382	94
RhCMV-pS22-A06-U-06	0.970529	95																				RhCMV-pS22-C01-U-14	1.01351	95
RhCMV-pS22-A05-U-23	0.970528	96																				RhCMV-pS22-C01-U-39	1.01215	96
RhCMV-pS22-A05-U-35	0.96802	97																				RhCMV-pS22-C04-U-35	1.01124	97
RhCMV-pS22-A06-U-09	0.967788	98																				RhCMV-pS22-C02-U-02	1.00923	98
RhCMV-pS22-A06-U-24	0.9666	99																				RhCMV-pS22-C05-U-24	1.00903	99
RhCMV-pS22-A03-U-20	0.965716	100																				RhCMV-pS22-C01-U-31	1.00857	100
RhCMV-pS22-A05-U-42	0.96438	101																				RhCMV-pS22-C04-U-01	1.00737	101
RhCMV-pS22-A05-U-31	0.964056	102																				RhCMV-pS22-C04-U-29	1.00714	102
RhCMV-pS22-A06-U-28	0.962579	103																				RhCMV-pS22-C04-U-32	1.00652	103
RhCMV-pS22-A02-U-31	0.961106	104																				RhCMV-pS22-C03-U-17	1.00332	104
RhCMV-pS22-A03-U-03	0.959035	105																				RhCMV-pS22-C04-U-08	1.00202	105
RhCMV-pS22-A06-U-01	0.958558	106																				RhCMV-pS22-C05-U-35	1.0011	106
RhCMV-pS22-A04-U-04	0.957448	107																				RhCMV-pS22-C05-U-29	0.999183	107
RhCMV-pS22-A02-U-12	0.953562	108																				RhCMV-pS22-C02-U-19	0.995957	108
RhCMV-pS22-A03-U-29	0.950298	109																				RhCMV-pS22-C05-U-03	0.993258	109
RhCMV-pS22-A01-U-16	0.949603	110																				RhCMV-pS22-C06-U-24	0.992564	110
RhCMV-pS22-A01-U-10	0.947038	111																				RhCMV-pS22-C03-U-24	0.991782	111
RhCMV-pS22-A04-U-05	0.946754	112																				RhCMV-pS22-C01-U-16	0.990954	112
RhCMV-pS22-A06-U-27	0.946494	113																				RhCMV-pS22-C01-U-38	0.990868	113
RhCMV-pS22-A04-U-31	0.945482	114																				RhCMV-pS22-C01-U-13	0.989932	114
RhCMV-pS22-A04-U-02	0.942491	115																				RhCMV-pS22-C04-U-16	0.98963	115
RhCMV-pS22-A02-U-22	0.939889	116																				RhCMV-pS22-C05-U-36	0.988988	116
RhCMV-pS22-A06-U-05	0.939549	117																				RhCMV-pS22-C04-U-25	0.987848	117
RhCMV-pS22-A04-U-10	0.939499	118																				RhCMV-pS22-C03-U-03	0.986957	118
RhCMV-pS22-A03-U-25	0.937106	119																				RhCMV-pS22-C01-U-21	0.983378	119
RhCMV-pS22-A05-U-21	0.933962	120																				RhCMV-pS22-C01-U-35	0.982697	120
RhCMV-pS22-A06-U-23	0.933152	121																				RhCMV-pS22-C02-U-12	0.981587	121
RhCMV-pS22-A06-U-25	0.93169	122																				RhCMV-pS22-C04-U-28	0.976616	122
RhCMV-pS22-A03-U-17	0.928883	123																				RhCMV-pS22-C05-U-50	0.972519	123
RhCMV-pS22-A06-U-16	0.9284	124																				RhCMV-pS22-C04-U-02	0.969256	124
RhCMV-pS22-A05-U-08	0.92385	125																				RhCMV-pS22-C03-U-26	0.968261	125
RhCMV-pS22-A02-U-15	0.923669	126																				RhCMV-pS22-C05-U-31	0.966681	126
RhCMV-pS22-A02-U-03	0.921689	127																				RhCMV-pS22-C02-U-09	0.965174	127
RhCMV-pS22-A03-U-05	0.920745	128																				RhCMV-pS22-C04-U-06	0.962827	128
RhCMV-pS22-A04-U-06	0.913622	129																				RhCMV-pS22-C01-U-33	0.962694	129
RhCMV-pS22-A01-U-29	0.912675	130																				RhCMV-pS22-C03-U-34	0.96223	130
RhCMV-pS22-A03-U-27	0.912094	131																				RhCMV-pS22-C05-U-39	0.960582	131
RhCMV-pS22-A02-U-16	0.910656	132																				RhCMV-pS22-C03-U-22	0.957707	132
RhCMV-pS22-A05-U-13	0.908884	133																				RhCMV-pS22-C05-U-52	0.954657	133
RhCMV-pS22-A03-U-06	0.907211	134																				RhCMV-pS22-C05-U-34	0.954047	134
RhCMV-pS22-A06-U-10	0.907107	135																				RhCMV-pS22-C03-U-45	0.950847	135
RhCMV-pS22-A05-U-44	0.906214	136																				RhCMV-pS22-C05-U-04	0.94908	136
RhCMV-pS22-A02-U-37	0.905281	137																				RhCMV-pS22-C01-U-26	0.946096	137
RhCMV-pS22-A04-U-39	0.904573	138																				RhCMV-pS22-C05-U-54	0.945246	138
RhCMV-pS22-A01-U-02	0.904127	139																				RhCMV-pS22-C01-U-22	0.944223	139
RhCMV-pS22-A06-U-29	0.903634	140																				RhCMV-pS22-C06-U-34	0.942566	140
RhCMV-pS22-A05-U-39	0.902008	141																				RhCMV-pS22-C02-U-17	0.939732	141
RhCMV-pS22-A01-U-24	0.90105	142																				RhCMV-pS22-C04-U-22	0.938812	142
RhCMV-pS22-A04-U-23	0.897318	143																				RhCMV-pS22-C05-U-09	0.93662	143
RhCMV-pS22-A02-U-01	0.897076	144																				RhCMV-pS22-C06-U-25	0.936592	144
RhCMV-pS22-A01-U-28	0.895921	145																				RhCMV-pS22-C03-U-02	0.936448	145
RhCMV-pS22-A05-U-19	0.89505	146																				RhCMV-pS22-C05-U-28	0.935923	146
RhCMV-pS22-A03-U-12	0.893677	147																				RhCMV-pS22-C05-U-49	0.935487	147
RhCMV-pS22-A05-U-47	0.893513	148																				RhCMV-pS22-C05-U-40	0.934964	148
RhCMV-pS22-A06-U-30	0.891114	149																				RhCMV-pS22-C01-U-48	0.933669	149
RhCMV-pS22-A01-U-04	0.890194	150																				RhCMV-pS22-C02-U-32	0.931958	150
RhCMV-pS22-A04-U-27	0.889914	151																				RhCMV-pS22-C01-U-40	0.930264	151
RhCMV-pS22-A03-U-02	0.888538	152																				RhCMV-pS22-C03-U-04	0.929437	152
RhCMV-pS22-A05-U-25	0.887689	153																				RhCMV-pS22-C05-U-45	0.929387	153
RhCMV-pS22-A01-U-19	0.887373	154																				RhCMV-pS22-C06-U-13	0.928023	154
RhCMV-pS22-A02-U-04	0.886703	155																				RhCMV-pS22-C05-U-15	0.927906	155
RhCMV-pS22-A03-U-19	0.877231	156																				RhCMV-pS22-C02-U-34	0.927324	156
RhCMV-pS22-A03-U-08	0.876717	157																				RhCMV-pS22-C01-U-23	0.927114	157
RhCMV-pS22-A05-U-10	0.875473	158																				RhCMV-pS22-C03-U-37	0.926572	158
RhCMV-pS22-A02-U-27	0.875387	159																				RhCMV-pS22-C02-U-11	0.923791	159
RhCMV-pS22-A02-U-18	0.875293	160																				RhCMV-pS22-C06-U-17	0.923228	160
RhCMV-pS22-A05-U-41	0.874098	161																				RhCMV-pS22-C02-U-10	0.922848	161
RhCMV-pS22-A02-U-07	0.874067	162																				RhCMV-pS22-C06-U-07	0.92252	162
RhCMV-pS22-A05-U-48	0.872156	163																				RhCMV-pS22-C04-U-37	0.919988	163
RhCMV-pS22-A01-U-32	0.868396	164																				RhCMV-pS22-C04-U-23	0.918051	164
RhCMV-pS22-A03-U-26	0.86798	165																				RhCMV-pS22-C03-U-39	0.917828	165
RhCMV-pS22-A02-U-28	0.866995	166																				RhCMV-pS22-C01-U-36	0.916985	166
RhCMV-pS22-A01-U-14	0.866174	167																				RhCMV-pS22-C05-U-44	0.915794	167
RhCMV-pS22-A04-U-34	0.865832	168																				RhCMV-pS22-C03-U-10	0.914284	168
RhCMV-pS22-A05-U-26	0.865118	169																				RhCMV-pS22-C01-U-45	0.914006	169
RhCMV-pS22-A05-U-37	0.864471	170																				RhCMV-pS22-C05-U-37	0.913354	170
RhCMV-pS22-A03-U-07	0.864468	171																				RhCMV-pS22-C05-U-58	0.913093	171
RhCMV-pS22-A03-U-36	0.86087	172																				RhCMV-pS22-C01-U-10	0.911112	172
RhCMV-pS22-A03-U-21	0.860613	173																				RhCMV-pS22-C03-U-43	0.910063	173
RhCMV-pS22-A06-U-31	0.856844	174																				RhCMV-pS22-C01-U-20	0.909495	174
RhCMV-pS22-A04-U-26	0.856783	175																				RhCMV-pS22-C01-U-01	0.907707	175
RhCMV-pS22-A04-U-13	0.85409	176																				RhCMV-pS22-C06-U-18	0.906955	176
RhCMV-pS22-A01-U-15	0.853865	177																				RhCMV-pS22-C05-U-57	0.904902	177
RhCMV-pS22-A02-U-05	0.849832	178																				RhCMV-pS22-C02-U-33	0.90463	178
RhCMV-pS22-A04-U-40	0.849378	179																				RhCMV-pS22-C04-U-21	0.904572	179
RhCMV-pS22-A05-U-51	0.848534	180																				RhCMV-pS22-C05-U-61	0.902898	180
RhCMV-pS22-A05-U-06	0.847887	181																				RhCMV-pS22-C05-U-41	0.902811	181
RhCMV-pS22-A02-U-23	0.846626	182																				RhCMV-pS22-C04-U-12	0.902481	182
RhCMV-pS22-A05-U-15	0.84635	183																				RhCMV-pS22-C02-U-07	0.900625	183
RhCMV-pS22-A05-U-38	0.845946	184																				RhCMV-pS22-C06-U-32	0.90043	184
RhCMV-pS22-A04-U-20	0.844293	185																				RhCMV-pS22-C02-U-27	0.89929	185
RhCMV-pS22-A03-U-33	0.842453	186																				RhCMV-pS22-C01-U-19	0.897408	186
RhCMV-pS22-A02-U-10	0.841345	187																				RhCMV-pS22-C05-U-46	0.89706	187
RhCMV-pS22-A05-U-32	0.840526	188																				RhCMV-pS22-C03-U-41	0.896041	188
RhCMV-pS22-A04-U-43	0.840179	189																				RhCMV-pS22-C03-U-12	0.895513	189
RhCMV-pS22-A04-U-22	0.838908	190																				RhCMV-pS22-C06-U-23	0.894927	190
RhCMV-pS22-A02-U-02	0.836159	191																				RhCMV-pS22-C05-U-48	0.894359	191
RhCMV-pS22-A02-U-38	0.835121	192																				RhCMV-pS22-C06-U-12	0.892805	192
RhCMV-pS22-A04-U-01	0.834047	193																				RhCMV-pS22-C02-U-14	0.892616	193
RhCMV-pS22-A05-U-29	0.833811	194																				RhCMV-pS22-C05-U-20	0.892093	194
RhCMV-pS22-A01-U-09	0.832495	195																				RhCMV-pS22-C05-U-05	0.889218	195
RhCMV-pS22-A02-U-20	0.830784	196																				RhCMV-pS22-C04-U-31	0.888537	196
RhCMV-pS22-A05-U-33	0.830009	197																				RhCMV-pS22-C01-U-34	0.88813	197
RhCMV-pS22-A04-U-29	0.829559	198																				RhCMV-pS22-C06-U-29	0.887931	198
RhCMV-pS22-A02-U-34	0.828709	199																				RhCMV-pS22-C06-U-01	0.886516	199
RhCMV-pS22-A04-U-36	0.828288	200																				RhCMV-pS22-C05-U-55	0.886342	200
RhCMV-pS22-A02-U-06	0.823617	201																				RhCMV-pS22-C01-U-03	0.885321	201
RhCMV-pS22-A01-U-01	0.823177	202																				RhCMV-pS22-C03-U-09	0.884582	202
RhCMV-pS22-A02-U-32	0.820316	203																				RhCMV-pS22-C05-U-60	0.884077	203
RhCMV-pS22-A04-U-33	0.819687	204																				RhCMV-pS22-C05-U-17	0.882247	204
RhCMV-pS22-A03-U-24	0.819154	205																				RhCMV-pS22-C03-U-47	0.881718	205
RhCMV-pS22-A05-U-12	0.817389	206																				RhCMV-pS22-C05-U-07	0.876496	206
RhCMV-pS22-A03-U-32	0.815642	207																				RhCMV-pS22-C01-U-17	0.876128	207
RhCMV-pS22-A02-U-35	0.803814	208																				RhCMV-pS22-C05-U-02	0.873272	208
RhCMV-pS22-A04-U-17	0.800092	209																				RhCMV-pS22-C01-U-09	0.872979	209
RhCMV-pS22-A01-U-25	0.798986	210																				RhCMV-pS22-C06-U-33	0.872916	210
RhCMV-pS22-A01-U-22	0.794798	211																				RhCMV-pS22-C02-U-13	0.872905	211
RhCMV-pS22-A05-U-45	0.790612	212																				RhCMV-pS22-C05-U-11	0.872488	212
RhCMV-pS22-A04-U-12	0.790146	213																				RhCMV-pS22-C01-U-47	0.87034	213
RhCMV-pS22-A04-U-38	0.787752	214																				RhCMV-pS22-C06-U-30	0.869614	214
RhCMV-pS22-A01-U-33	0.787361	215																				RhCMV-pS22-C03-U-16	0.86845	215
RhCMV-pS22-A01-U-03	0.786164	216																				RhCMV-pS22-C02-U-16	0.867644	216
RhCMV-pS22-A05-U-17	0.784625	217																				RhCMV-pS22-C06-U-05	0.865447	217
RhCMV-pS22-A01-U-21	0.783856	218																				RhCMV-pS22-C04-U-04	0.86491	218
RhCMV-pS22-A04-U-41	0.783265	219																				RhCMV-pS22-C06-U-28	0.863482	219
RhCMV-pS22-A04-U-42	0.778329	220																				RhCMV-pS22-C01-U-28	0.86336	220
RhCMV-pS22-A01-U-18	0.776847	221																				RhCMV-pS22-C05-U-53	0.863164	221
RhCMV-pS22-A05-U-18	0.776293	222																				RhCMV-pS22-C06-U-20	0.862146	222
RhCMV-pS22-A02-U-36	0.775146	223																				RhCMV-pS22-C06-U-15	0.861595	223
RhCMV-pS22-A04-U-30	0.773767	224																				RhCMV-pS22-C02-U-08	0.859399	224
RhCMV-pS22-A04-U-44	0.76913	225																				RhCMV-pS22-C01-U-27	0.856977	225
RhCMV-pS22-A03-U-01	0.766474	226																				RhCMV-pS22-C01-U-02	0.855615	226
RhCMV-pS22-A01-U-30	0.765478	227																				RhCMV-pS22-C03-U-31	0.8539	227
RhCMV-pS22-A03-U-04	0.764418	228																				RhCMV-pS22-C06-U-03	0.853184	228
RhCMV-pS22-A04-U-11	0.761127	229																				RhCMV-pS22-C03-U-18	0.852091	229
RhCMV-pS22-A04-U-37	0.759931	230																				RhCMV-pS22-C03-U-42	0.852091	230
RhCMV-pS22-A05-U-01	0.751457	231																				RhCMV-pS22-C03-U-07	0.851639	231
RhCMV-pS22-A05-U-50	0.750729	232																				RhCMV-pS22-C02-U-25	0.848248	232
RhCMV-pS22-A04-U-35	0.725303	233																				RhCMV-pS22-C05-U-56	0.847741	233
RhCMV-pS22-A04-U-32	0.721938	234																				RhCMV-pS22-C01-U-12	0.843357	234
RhCMV-pS22-A04-U-19	0.721788	235																				RhCMV-pS22-C06-U-06	0.842257	235
																						RhCMV-pS22-C02-U-20	0.842123	236
																						RhCMV-pS22-C05-U-18	0.841816	237
																						RhCMV-pS22-C03-U-29	0.839878	238
																						RhCMV-pS22-C05-U-06	0.838854	239
																						RhCMV-pS22-C02-U-23	0.837882	240
																						RhCMV-pS22-C05-U-32	0.836675	241
																						RhCMV-pS22-C04-U-18	0.836557	242
																						RhCMV-pS22-C05-U-59	0.834845	243
																						RhCMV-pS22-C01-U-15	0.833739	244
																						RhCMV-pS22-C06-U-04	0.831487	245
																						RhCMV-pS22-C02-U-28	0.82893	246
																						RhCMV-pS22-C04-U-30	0.825247	247
																						RhCMV-pS22-C03-U-23	0.824499	248
																						RhCMV-pS22-C03-U-05	0.823369	249
																						RhCMV-pS22-C04-U-33	0.820831	250
																						RhCMV-pS22-C03-U-46	0.819373	251
																						RhCMV-pS22-C04-U-17	0.818662	252
																						RhCMV-pS22-C03-U-28	0.818092	253
																						RhCMV-pS22-C02-U-03	0.809691	254
																						RhCMV-pS22-C02-U-35	0.807964	255
																						RhCMV-pS22-C05-U-38	0.801037	256
																						RhCMV-pS22-C03-U-36	0.800602	257
																						RhCMV-pS22-C03-U-55	0.797888	258
																						RhCMV-pS22-C02-U-24	0.796656	259
																						RhCMV-pS22-C03-U-19	0.796154	260
																						RhCMV-pS22-C06-U-26	0.796111	261
																						RhCMV-pS22-C03-U-08	0.794948	262
																						RhCMV-pS22-C04-U-27	0.786049	263
																						RhCMV-pS22-C03-U-54	0.784771	264
																						RhCMV-pS22-C05-U-16	0.784394	265
																						RhCMV-pS22-C01-U-49	0.782923	266
																						RhCMV-pS22-C03-U-49	0.772257	267
																						RhCMV-pS22-C03-U-50	0.770372	268
																						RhCMV-pS22-C03-U-30	0.769091	269
																						RhCMV-pS22-C06-U-10	0.768675	270
																						RhCMV-pS22-C02-U-22	0.758177	271
																						RhCMV-pS22-C03-U-14	0.750772	272
																						RhCMV-pS22-C06-U-14	0.746664	273
